# Supplementary material for: Study protocol of the Edinburgh and Lothian Virus Intervention Study in Kids: a randomised controlled trial of hypertonic saline nose drops in children with upper respiratory tract infections (ELVIS Kids)
Source: PubMed Central journal article supplement — BMJ Open. 2021 May 5;11(5):e049964. doi: 10.1136/bmjopen-2021-049964 (PMC8103393; doi:10.1136/bmjopen-2021-049964), 2021-05-05
Supplement: bmjopen-2021-049964.draft_revisions.pdf [file bmjopen-2021-049964.draft_revisions.pdf]

# BMJ Open

BMJ Open is committed to open peer review. As part of this commitment we make the peer review history of every article we publish publicly available.

When an article is published we post the peer reviewers' comments and the authors' responses online. We also post the versions of the paper that were used during peer review. These are the versions that the peer review comments apply to.

The versions of the paper that follow are the versions that were submitted during the peer review process. They are not the versions of record or the final published versions. They should not be cited or distributed as the published version of this manuscript.

BMJ Open is an open access journal and the full, final, typeset and author-corrected version of record of the manuscript is available on our site with no access controls, subscription charges or pay-per-view fees (<http://bmjopen.bmj.com>).

If you have any questions on BMJ Open's open peer review process please email [info.bmjopen@bmj.com](mailto:info.bmjopen@bmj.com)

# BMJ Open

## Study protocol of the Edinburgh and Lothian Virus Intervention Study in Kids: A randomised controlled trial of hypertonic saline nose drops in children with upper respiratory tract infections (ELVIS Kids)

|                               |                                                                                                                                                                                                                                                                                                                                                                                                                                                                                                                                                                                                                                                                                                                                                                                    |
|-------------------------------|------------------------------------------------------------------------------------------------------------------------------------------------------------------------------------------------------------------------------------------------------------------------------------------------------------------------------------------------------------------------------------------------------------------------------------------------------------------------------------------------------------------------------------------------------------------------------------------------------------------------------------------------------------------------------------------------------------------------------------------------------------------------------------|
| Journal:                      | <i>BMJ Open</i>                                                                                                                                                                                                                                                                                                                                                                                                                                                                                                                                                                                                                                                                                                                                                                    |
| Manuscript ID                 | bmjopen-2021-049964                                                                                                                                                                                                                                                                                                                                                                                                                                                                                                                                                                                                                                                                                                                                                                |
| Article Type:                 | Protocol                                                                                                                                                                                                                                                                                                                                                                                                                                                                                                                                                                                                                                                                                                                                                                           |
| Date Submitted by the Author: | 05-Feb-2021                                                                                                                                                                                                                                                                                                                                                                                                                                                                                                                                                                                                                                                                                                                                                                        |
| Complete List of Authors:     | Ramalingam, Sandeep ; Royal Infirmary of Edinburgh, Department of Laboratory Medicine<br>Graham, Catriona; The University of Edinburgh, Edinburgh Clinical Research Facility<br>Oatey, Katherine; The University of Edinburgh Usher Institute of Population Health Sciences and Informatics<br>Rayson, Phillip; The University of Edinburgh, Edinburgh Clinical Trials Unit<br>Stoddart, Andrew; The University of Edinburgh Usher Institute of Population Health Sciences and Informatics, Edinburgh Health Services Research Unit<br>Sheikh, Aziz; The University of Edinburgh Usher Institute of Population Health Sciences and Informatics, Division of Community Health Sciences<br>Cunningham, Steven; Royal Hospital for Sick Children, Department of Child Life and Health |
| Keywords:                     | Paediatric infectious disease & immunisation < PAEDIATRICS, VIROLOGY, PRIMARY CARE, Community child health < PAEDIATRICS, NEONATOLOGY                                                                                                                                                                                                                                                                                                                                                                                                                                                                                                                                                                                                                                              |
|                               |                                                                                                                                                                                                                                                                                                                                                                                                                                                                                                                                                                                                                                                                                                                                                                                    |

SCHOLARONE™  
Manuscripts

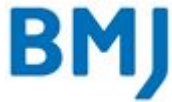

I, the Submitting Author has the right to grant and does grant on behalf of all authors of the Work (as defined in the below author licence), an exclusive licence and/or a non-exclusive licence for contributions from authors who are: i) UK Crown employees; ii) where BMJ has agreed a CC-BY licence shall apply, and/or iii) in accordance with the terms applicable for US Federal Government officers or employees acting as part of their official duties; on a worldwide, perpetual, irrevocable, royalty-free basis to BMJ Publishing Group Ltd ("BMJ") its licensees and where the relevant Journal is co-owned by BMJ to the co-owners of the Journal, to publish the Work in this journal and any other BMJ products and to exploit all rights, as set out in our [licence](#).

The Submitting Author accepts and understands that any supply made under these terms is made by BMJ to the Submitting Author unless you are acting as an employee on behalf of your employer or a postgraduate student of an affiliated institution which is paying any applicable article publishing charge ("APC") for Open Access articles. Where the Submitting Author wishes to make the Work available on an Open Access basis (and intends to pay the relevant APC), the terms of reuse of such Open Access shall be governed by a Creative Commons licence – details of these licences and which [Creative Commons](#) licence will apply to this Work are set out in our licence referred to above.

Other than as permitted in any relevant BMJ Author's Self Archiving Policies, I confirm this Work has not been accepted for publication elsewhere, is not being considered for publication elsewhere and does not duplicate material already published. I confirm all authors consent to publication of this Work and authorise the granting of this licence.

1  
2 **Study protocol of the Edinburgh and Lothian Virus Intervention Study in Kids: A**  
3 **randomised controlled trial of hypertonic saline nose drops in children with upper**  
4 **respiratory tract infections (ELVIS Kids)**  
5

6  
7 Sandeep Ramalingam<sup>1</sup>, Catriona Graham<sup>2</sup>, Katherine Oatey<sup>3</sup>, Phillip Rayson<sup>3</sup>, Andrew  
8 Stoddart<sup>3</sup>, Aziz Sheikh<sup>4</sup>, Steve Cunningham<sup>5</sup> on behalf of the ELVIS Kids Trial  
9 Investigators  
10  
11

12  
13  
14 1. Department of Laboratory Medicine, Royal Infirmary of Edinburgh, 51 Little France Crescent,  
15 Edinburgh, EH16 4SA.  
16

17  
18 2. Edinburgh Clinical Research Facility, University of Edinburgh, Western General Hospital,  
19 Crewe Road South, Edinburgh, EH4 2XU, UK.  
20

21  
22 3. Edinburgh Clinical Trials Unit, Usher Institute, Level 2, BioQuarter 9, 9 Little France Road  
23 Edinburgh, EH16 4UX  
24

25  
26 4. Centre of Medical Informatics, Usher Institute, The University of Edinburgh, Medical School  
27 Doorway 3, Teviot Place, Edinburgh, EH8 9AG, UK.  
28

29  
30 5. Centre for Inflammation Research, Department of Child Life and Health, Royal Hospital for  
31 Sick Children; 9 Sciennes Road; Edinburgh EH9 1LF  
32  
33

34  
35 **Correspondence:**

36 Dr. Sandeep Ramalingam

37 Consultant Virologist

38 Royal Infirmary of Edinburgh

39 51 Little France Crescent

40 Edinburgh EH16 4SA

41 sandeep.ramalingam@nhslothian.scot.nhs.uk  
42  
43  
44  
45  
46  
47  
48

49  
50 Keywords: Upper respiratory tract infection, common cold, children, hypertonic saline, nose  
51 drops, rhinovirus, coronavirus, influenza, respiratory syncytial virus, metapneumovirus,  
52 adenovirus, parainfluenza virus, enterovirus.  
53  
54

55 Word Count: 4463  
56  
57  
58  
59  
60

## Abstract

**Introduction:** ELVIS Kids is a parallel, open-label, randomised controlled trial (RCT) of hypertonic saline (HS) nose drops (~2.6% sodium chloride; NaCl) vs. standard care in children <7 years of age with symptoms of an upper respiratory tract infection (URTI).

**Methods and analysis:** Children are recruited prior to URTI or within 48 hours of developing URTI symptoms by advertising in areas such as local schools/nurseries, health centres/hospitals, recreational facilities, public events, workplaces, local/social media. Willing parents/guardians, of children <7 years of age will be asked to contact the research team at their local site. Children will be randomised to either a control arm (standard symptomatic care), or intervention arm (3 drops/nostril of HS, at least 4 times a day, until 24 hours after asymptomatic or a maximum of 28 days). All participants are requested to provide a nasal swab at the start of the study (intervention arm: before HS drops) and then daily for 4 more days. Parent/guardian complete a validated daily symptom diary, an end of illness questionnaire, and a wheeze questionnaire (day 28). The parent/guardian of a child in the intervention arm is taught to prepare HS nose drops. Parent/guardian of children asymptomatic at recruitment are requested to inform the research team within 48 hours of their child developing an URTI and follow the instructions already provided. The day 28 questionnaire determines if the child experienced a wheeze following illness. Participation in the study ends on day 28.

**Ethics and dissemination:** The study has been approved by the West of Scotland Research Ethics Service (REC) (18/WS/0080). It is co-sponsored by Academic and Clinical Central Office for Research and Development (ACCORD) - a partnership between the University of Edinburgh and NHS Lothian Health Board. The findings will be disseminated through peer-reviewed publications, conference presentations and via the study website.

**Trial registration number:** Clinicaltrials.gov: NCT03463694

### Strengths and limitations of this study

- Open label community-based randomised controlled study investigating the effectiveness of HS vs standard treatment in children under 7 years of age with a common cold
- Parents in the intervention arm are taught to safely make HS at home
- Nose swabs are collected to identify the virus(es) and to measure change in viral shedding
- A validated symptom score diary (CARIFS) is used as part of the daily diary
- There is no placebo arm

## Introduction:

Viral upper respiratory tract infections (URTI) are very common in childhood resulting in a significant burden on the population and health services<sup>1</sup>. The annual incidence rate of URTI in childhood can vary between 6-12 episodes<sup>2,3</sup>. Children have a longer duration of illness (mean 1.8 weeks; standard deviation: 1.3 weeks) compared to adults<sup>3,4</sup>. In Scotland, URTI is the leading cause of general practitioner (GP) visits in children <5 years (n=84710, 574/1000 population) and the fourth most common cause of consultation in children aged 5-14 (n=33790, 116.5/1000 population)<sup>5</sup>. In secondary care, in 2015-16, 13.3% (n=16,644) and 19.7% (14,600) of all admissions/emergency admissions respectively in children were due to upper/lower respiratory tract infections<sup>6</sup>. 12-14% of children who develop an URTI will go on to develop lower respiratory tract disease (viral induced wheeze: 80/1000<sup>7</sup>, bronchiolitis: 46/1000<sup>8</sup>, and pneumonia: 0.27 episodes/child year<sup>9</sup>). Hence interventions that reduce URTI severity may considerably benefit patients/carers and reduce pressure on the NHS. Since >200 viruses<sup>10</sup> can cause an URTI, individually targeted antiviral therapy is impractical and measures that work against all viruses are required.

New data suggest that hypertonic saline (HS) may be able to suppress viral replication, regardless of viral type and hence be a potential respiratory antiviral agent with clinical application. Saline irrigation is commonly used in clinical practice, mostly to deliver a mucolytic effect. However, we have recently identified that human epithelial (cervical-HeLa, respiratory-A549) cells utilise NaCl to mount a broad-spectrum antiviral effect against representative DNA, RNA enveloped and non-enveloped viruses<sup>11</sup>. The antiviral effect is dependent on the entry of chloride ions into the cell and the production of intracellular hypochlorous acid (HOCl)<sup>11</sup>. HOCl is the active ingredient of bleach, which can inactivate most viruses<sup>12-15</sup>. A polymorphism causing reduction in HOCl production has been reported in individuals with cervical cancer<sup>16</sup>. Since cervical cancer follows infection with high-risk types of human papilloma viruses, it suggests a key role for local antiviral mechanisms. HOCl production is an important anti-bacterial mechanism in human neutrophils<sup>17</sup>. Increased HOCl production is reported within gut epithelial cell of fruit flies after bacterial lysate ingestion<sup>18</sup>. These data suggest an anti-infective role of HOCl and its precursor NaCl in epithelial cells.

In addition, it has recently been shown that accumulation of Na<sup>+</sup> ions in human skin helps fight bacterial/parasitic infections<sup>19,20</sup>. A high salt diet increased Na<sup>+</sup> in skin leading to a hypertonic environment, increased Nitric Oxide (NO) production in macrophages and thereby pathogen removal<sup>19,20</sup>. Whilst our laboratory data point to the importance of Cl<sup>-</sup> in combating viral infections, Jantsch et al have shown the importance of Na<sup>+</sup> in fighting bacterial infections. Taken together, these data suggest that innate immunity may be dependent on NaCl in epithelial cells helping to clear bacterial and viral infection.

Nebulised HS has been used to treat bronchiolitis; an acute viral infection of young children caused by a variety of respiratory viruses. Meta-analyses of current trials suggest a possible reduction in length of hospital stay<sup>21,22</sup>, but the association is weak and there have been concerns about the replicability of this finding<sup>23-27</sup> potentially as HS has been given at the peak of disease when viral load is maximum and lower respiratory tract disease (with potential

dysregulated immune response) is established. More positive signals have been demonstrated when HS has been administered in accident and emergency department contexts to reduce hospital admission rates: data remain conflicting and a systematic review has been started to analyse data as they emerge<sup>26-28</sup>.

The role of saline (isotonic or hypertonic) in children with viral URTI has been explored in two published studies. In children aged 6-10 years administered isotonic saline as a spray (6 times/day) there was a significant reduction in reported sore throat, nasal secretions, and use of nasal decongestants/mucolytic (vs. standard care, no placebo)<sup>29</sup>. In children <2 years treated with saline/sea water drops (thrice a day for 5 days) there was a significant reduction in URTI symptoms reported when compared to untreated children<sup>30</sup>. However, a Cochrane review concluded that no definitive conclusions could be drawn as the available studies were small and had major methodological limitations: baseline symptom score was calculated over 7 days (not at the point of entry) and groups had different characteristics at baseline<sup>31</sup>.

We recently completed the Edinburgh and Lothians' Viral Intervention Study (ELVIS), an open label pilot randomised controlled trial (RCT) of hypertonic saline nasal irrigation and gargling (HSNIG) in 66 adults with an URTI ([www.elvisstudy.com](http://www.elvisstudy.com))<sup>4</sup>. Most participants were infected with rhinoviruses/coronaviruses. The intervention arm had a 22% reduction in duration of illness (mean (SD) of intervention arm: 6.8 days (2.2) and control arm 8.7 days (3.3), difference of 1.9 days;  $p=0.01$ ). 93% believed HSNIG helped improve symptoms of the cold. There was 36% reduction in over-the-counter medication use ( $p=0.003$ ), transmission within household was reduced by 35% ( $p=0.006$ ), and viral shedding reduced at a faster rate of  $\geq 0.5 \log_{10}/\text{day}$  in those receiving HSNIG ( $p=0.04$ )<sup>4</sup>. The reduction in viral shedding and transmission within household were supportive of our laboratory data and consistent with a direct cellular antiviral action by NaCl.

Given the laboratory evidence supported by our demonstration of clinical benefits in adults an RCT in children with URTI to study the effects of HS on duration of illness and viral shedding is now needed. No suitable placebo is available: Sodium bicarbonate and plain water cause discomfort when administered to nasal mucosa and normal saline, a commonly used, safe, placebo contains NaCl and so may not act as a placebo. For these reasons, the study will not be placebo controlled.

## **Methods and analysis:**

### **Study objectives**

#### **Primary objective:**

To investigate whether the use of parent/guardian-initiated HS nose drops administered to children with symptoms consistent with acute viral URTI reduces the duration of symptoms when compared to children managed using standard care.

#### **Secondary objectives:**

To determine the effect of HS nose drops on:

1. Severity of all symptoms

2. Duration and severity of individual symptoms
3. Contact with NHS 24, out of hours primary care (OOH), and primary care (GP)
4. Hospital attendance (i.e. A&E attendance and/or hospital admission) and diagnosis
5. Reduction in wheeze
6. Over the counter medication use
7. Duration, reduction or rate of reduction in viral shedding
8. Transmission within the household
9. Side effects associated with the use of saline nose drops
10. Adverse events associated with the use of saline nose drops
11. Time off from school/nursery for child and workdays lost for parent/guardian
12. Cost associated with illness (over the counter medication costs and NHS costs)

### **Study design and sample size:**

ELVIS Kids is a parallel, open label, RCT of HS nose drops (~2.6% NaCl) vs. standard care in children <7 years of age with symptoms of an URTI. The aim is to recruit a total of 480 children (240/arm).

The study will run over ~42 months at participating sites in Scotland (sites are as listed on [clinicaltrials.gov](http://clinicaltrials.gov)). Children are recruited prior to, or within 48 hours of developing URTI symptoms by advertising in areas such as local schools, nurseries, health centres, hospitals, recreational facilities, workplaces public events and the community as well as local and social media. For the purposes of this study an URTI is defined as: at least two respiratory symptoms (nasal congestion, runny nose, cough, sore throat) OR one respiratory symptoms and at least one systemic symptom (low energy/tired, muscle aches/pains, headache, fever  $\geq 38^{\circ}\text{C}$ ). Willing parents/guardians, will be directed by the study advertising to contact the research team at their local site) if they are interested in participating.

Children will be randomised to either a control arm of standard symptomatic care, or an intervention arm of 3 drops each nostril of HS at least 4 times a day and up to a maximum of 12 times a day until asymptomatic or maximum of 28 days. All parents/guardians will be requested to obtain a mid-turbinate nasal swab from the participant first thing in the morning (before nose drops in the intervention arm) for five for 5 consecutive days (unless the child is well before then), a daily symptom diary (a global severity question, CARIFS<sup>32</sup>, a validated illness measure in the UK, side effects and compliance with trial procedures) until they report the child as "not unwell", an end of illness questionnaire (infection in household contacts, ease of use and acceptability of intervention, medication and healthcare use, acceptability, time taken off usual activities, wheezing and whistling in the chest), a satisfaction questionnaire and adverse events. Parents/guardians of the children allocated to the intervention arm will be taught how to prepare the HS (including sterilization instructions for children under a year). Parents/guardians of children who are asymptomatic at recruitment are requested to inform their local research team



1 when the child develops an URTI (within 48 hours) and follow the instructions already provided  
2 to them. On day 28, parents/guardians will be contacted to determine if their child suffered from  
3 wheezing or whistling in the chest either during the illness or at any point until day 28.  
4 Participation in the study will end on day 28.  
5  
6  
7  
8

### 9 **Eligibility and consent:**

10 Pre-screening for eligibility to participate will be completed by a member of the research team  
11 at the clinical trials unit when parents/guardians phone to express interest in the study. If  
12 parents/guardians attend an appointment and take part in the study, the study number will be  
13 recorded on the screening log and details of eligibility will be recorded in the study database.  
14  
15  
16

### 17 **Inclusion criteria:**

- 18 1. Children between corrected gestational age of  $\geq 40$  weeks and  $< 7$  years of age
- 19 2. Children without URTI OR  $\leq 48$  hours of URTI\* starting.

20  
21  
22 \*A URTI being defined as at least two respiratory symptoms (nasal congestion (i.e. stuffy nose),  
23 runny nose, cough, sore throat) OR one respiratory symptom + at least one systemic symptom  
24 (Low energy/tired, muscle aches/pains, headache, fever  $38^{\circ}\text{C}$ ).  
25  
26  
27

### 28 **Exclusion criteria:**

- 29 1. Children needing immediate medical attention
- 30 2. Children using saline drops/sprays at the time of randomisation
- 31 3. Children on immunosuppressive medication, regular oral/inhaled steroids, regular  
32 antibiotics (use of antibiotics is allowed as long as the child does not need regular  
33 antibiotics)
- 34 4. Children with a known chronic illness (e.g. cystic fibrosis, cardiac, renal, liver, lung,  
35 neurological conditions) apart from wheeze or asthma which are not exclusions if the  
36 child is otherwise well and not on regular steroids)
- 37 5. Children being followed up for developmental delay
- 38 6. Children receiving the nasal flu vaccine  $\leq 14$  days ago
- 39 7. Children taking part in another interventional trial
- 40 8. If parents/guardians indicating that they are unable to comply with the study protocol  
41 prior to randomisation
- 42 9. If parents/guardians are unable to understand written or spoken English
- 43 10. Children randomised to ELVIS KIDS on a previous episode of URTI
- 44 11. Children with a concurrently participating sibling

45  
46  
47 All ineligible and non-recruited participants will be recorded on the ELVIS Kids screening log  
48 with a reason given.  
49  
50  
51  
52  
53  
54  
55  
56  
57  
58  
59  
60

**Obtaining consent:**

Only trained and delegated members of the trial team will take consent – this will usually be the research nurse. The participant information sheet (PIS), which will explain the aims of the study and the potential risks and benefits of the study treatment, are provided to parents/guardians when they meet the research team (also available online). A children's PIS will be available to discuss with older children attending the appointment with the option of giving their assent. (Supplement)

If the parent/guardian wishes to participate in the study, then they will be asked to sign the Informed Consent Form (ICF) (Supplement). Both the parent/guardian and the person delegated to take consent will sign and personally date the ICF. The original signed ICF must be kept by the Investigator in the investigator site file, 1 copy is provided to the parent/guardian, 1 copy is placed in TRAK. The same would apply in the case of assent being given.

**Randomisation and treatment allocation:**

A member of the research team from the clinical research facility will perform the randomisation using a web-based randomisation service managed by the Edinburgh Clinical Trials Unit (ECTU). Children will be allocated to receive either HS nose drops or standard care in a 1:1 ratio using minimisation based on age (0-2, >2 year) and sex and allocated to receive the treatment which minimises the imbalance with a probability 0.8. The study is not blinded apart from those carrying out lab assessments of nasal swabs.

Sea salt will be provided by Cornish Sea Salt company in 225g pots. They will be supplied to local pharmacies where they will be labelled and stored. A working stock will be issued to the research team. If a child is allocated to an intervention arm, the parent/guardian will be given instructions on the preparation and use of HS nose drops using instructional video, verbal and written information. Parents/guardians will be asked to add 1 level measure of sea salt to a fixed volume of freshly boiled water using the measuring spoon and clean glass jar provided. This provides a NaCl concentration of ~2.6% and the drops can be used once cooled. Two glass jars are provided so that the parent / guardian could use one and have a clean spare to prepare solution the next day. Two dropper bottles are provided with which nose drops can be applied (one in use, and a clean spare).

**Withdrawal of study participants:**

Parents/guardians are free to withdraw their child from the study at any point. If withdrawal occurs, the primary reason for withdrawal will be documented in the participant's case report form, if given. All data and swabs collected before withdrawal will be retained for analysis in cases where participants withdraw.

**Study assessments:**

1  
2 The protocol is designed in accordance with the standard protocol items: recommendations for  
3 interventional trials (SPIRIT). The trial overview of the study assessments is available as a  
4 SPIRIT figure (Table 1). At the appointment, a member of the research team will train the  
5 parent/guardian how to identify a URTI, how to measure temperature, how to complete the  
6 diaries and how to collect and return the mid-turbinate swabs. In addition, those in the  
7 intervention arm will be given instructions on how to prepare and apply nose drops. Baseline  
8 information on the child, contact details of parent / guardian and number of household members  
9 at the time of recruitment will be collected in the electronic case report form (eCRF). If recruited  
10 when symptomatic, parents will be instructed to start the study assessments the same day. If  
11 recruited when asymptomatic, and there are no changes to the child's medical information,  
12 parent/guardians will be asked to start the study assessments and to inform the study team the  
13 same day if possible or at least within 2 days of onset of illness. If recruited when asymptomatic,  
14 and there are changes to the child's medical information, parent/guardians will be asked to  
15 contact the study team to ensure the child still meets the eligibility criteria before starting the  
16 study procedures. If it is not suitable for the child to take part during this URTI (e.g. received  
17 the flu vaccine in the past 2 weeks) they will remain on study and be asked to contact the team  
18 at the onset of the next URTI.

19  
20  
21  
22  
23  
24  
25  
26  
27  
28 Parents/guardians are requested to collect a nasal (mid-turbinate) swab as soon as possible  
29 on day 1 and first thing in the morning (and prior to HS nose drops being applied) on days 2-5  
30 if children remain unwell. These samples are to be packed in the transport box provided, stored  
31 in the fridge and returned in the pre-paid envelope or as soon as possible after completing  
32 collection. If samples are not received by day 10, a reminder will be sent to the parent/guardian.

33  
34  
35  
36  
37  
38  
39  
40  
41  
42  
43  
44  
45  
46  
47  
48  
49  
50  
51  
52  
53  
54  
55  
56  
57  
58  
59  
60  
Parents/guardians will complete a daily diary (Supplement) which records any symptoms the  
child is experiencing, compliance to nasal swabs and HS drops, any side effects and use of  
healthcare services. Parents will be taught how to measure temperature with TempaDot.  
Parents are advised to measure the temperature only if they think the child has a fever. If the  
child has an axillary temperature of  $\geq 38^{\circ}\text{C}$ , it should be recorded as a fever in the daily diary.  
The diaries will be provided as an online form (unless parents cannot access this in which case  
a paper copy can be provided). If the online Daily Diary is not completed a reminder will be  
sent.

An end of illness diary (Supplement) and satisfaction questionnaire (Supplement) will be  
completed by the parent/guardian once the child is asymptomatic for >24hours or after a  
maximum of 28 days. On day 28, the parent/guardian will be contacted by email and sent a text  
message to ask if their child has experienced any wheeze since the end of illness diary was  
completed (Supplement).

Participants will be sent a £30 voucher by email as compensation for any inconvenience once  
they have returned the study data.

**Analysis and storage of samples:**

Up to five nasal swabs will be collected and posted to the Department of Laboratory Medicine, Royal Infirmary of Edinburgh, 51 Little France Crescent, Edinburgh, EH16 4SA, where they will be stored and processed. Day 1 samples will be analysed by the respiratory panel and the cycle threshold (CT) of positive samples recorded. If the day one sample is missing, the first available sample will be tested to identify the virus. If an agent is identified, all samples (days 1-5) will be tested in parallel to estimate change in viral shedding and the CT recorded. If a sample is positive on day 1 and negative on subsequent days, they may be tested for human DNA to confirm a sample was collected. Log conversion of each positive result will be done using the following formula:  $(40-CT \text{ of specimen})/3.3$  to estimate change in shedding. All nucleic acid extracts and remaining original samples will be stored in the Lothian NHS research Scotland BioResource biobank (REC reference 15/ES/0094) in future ethically approved studies.

**Outcomes / endpoints:**Primary endpoint:

Duration of illness (measured as the number of days until the parent reports the child to be well)

Secondary endpoints:

1. Severity of all symptoms as measured by CARIFS
2. The length of time for individual symptoms to resolve
3. Severity of individual symptoms
4. Contacting healthcare (NHS 24, OOH, GP) (Number of participants and frequency of contacts)
5. Participants needing GP appointments (Number of participants and frequency of contacts)
6. Participants attending hospital and diagnosis (Number of participants and frequency of contacts)
7. Length of stay in hospital if admitted
8. Number of participants reporting wheeze during illness and between end of illness to 28 days.
9. Number of participants reporting over the counter medication use
10. Duration of viral shedding
11. Reduction in viral shedding
12. Rate of reduction in viral shedding
13. Reduction in transmission to household contacts
14. Number of participants reporting side effects associated with nasal drops
15. Number of participants reporting adverse events associated with nasal drops
16. Types and severity of side effects/adverse events reported
17. Number of days lost from school/nursery for child
18. Number of days lost from work for parent/guardian
19. Cost of over the counter medication used

## 20. NHS costs associated with illness

### **Participant timeline:**

The participant pathways can be seen in figures 1 and 2. Participants will be active in the study for 28 days. There are no long term follow up assessments after day 28 of URTI developing.

### **Data collection:**

Baseline data will be collected on the baseline electronic CRF (eCRF) by a member of the research team. Parents/guardians will record study data onto either an online form which will be saved into the eCRF. A paper CRF (pCRF) option is available if a parent/guardian prefers it. pCRF will be returned to the local research team and transcribed by a member of the research team into the database and cross-checked by another.

Virological results are downloaded (identifiable by study number) on a weekly basis on to a specific drive by the Laboratory Information Management & Technology team. These will be emailed to the ECTU on a monthly basis and uploaded into the study database.

The trial database will be created and maintained by ECTU. Trained and delegated members of the research team will be given password-protected logins to the database to complete data entry. Data completed online by parents/guardians will be transmitted into the study database. The data will be stored in a secure server in the University of Edinburgh for at least the archiving period.

### **Adverse events:**

Symptoms and side effects from the Daily Diary will be recorded in the CRF but will not be recorded as an adverse event (AE) or adverse reaction. Hospitalisation is a study outcome and is exempt from reporting to the Sponsor as a serious adverse event.

Any other adverse events identified between Day 1 and Day 28 of the study will be recorded. Any events reaching seriousness criteria will be reported to the sponsor within 24 hours.

### **Sample size calculation and statistical analysis:**

Sample size calculation is based on mean (SD) duration of illness values in a control population from Gruber et al of 13 (9) days. To detect a 20% difference in mean duration, i.e. 3 days, using a two-sided, two-sample test with 5% level of significance, 90% power and common standard deviation of 9 days we will need a sample of 191 per treatment arm, without drop-outs. Hence, we will recruit 240 participants per arm to allow for up to 20% drop-outs.

Statistical analysis will be conducted according to, and full of the details will be specified in, the pre-specified Statistical Analysis Plan (SAP). Differences in illness duration between treatment arms will be compared using a two-sample t-test or non-parametric equivalent, as appropriate. This method will also be employed to examine differences between treatment arms for other continuous outcome measures such as average symptom score, viral shedding between treatment arms. For binary categorical data, for example the proportion of participants per arm

1 attending their GP, attending hospital, etc we will compare the treatment arms using a binomial  
2 test for the comparison of proportions. Where we have categorical data with more than 2  
3 categories a Chi-squared test will be used to examine the relationships between treatment  
4 arms. If the number of cases of individual viruses are sufficient, the above analysis will be  
5 repeated by virus type.  
6  
7  
8  
9

#### 10 **Oversight arrangements:**

11 The study is co-sponsored by ACCORD, a partnership between the University of Edinburgh  
12 and NHS Lothian Health Board based at QMRI, 47 Little France Crescent, Edinburgh Email:  
13 enquiries@accord.scot. The trial will be coordinated by a Project Management Group (PMG),  
14 consisting of the Chief Investigator, Co-investigators, Trial Manager, Statistician and  
15 Coordinating Nurse. The Trial Manager will oversee the study and will be accountable to the  
16 Chief Investigator. ECTU is responsible for trial management and oversight of data collection.  
17 The Edinburgh Clinical Research Facility are responsible for the statistical analysis. A  
18 Delegation Log will be prepared, detailing the responsibilities of each member of staff working  
19 on the trial. A Trial Steering Committee (TSC) has been established to oversee the conduct  
20 progress. As there will be no Data Monitoring Committee for this project, the TSC will review  
21 safety information as part of their remit.  
22  
23  
24  
25  
26  
27  
28

#### 29 **Ethics and dissemination:**

30 The study will be conducted in accordance with the principles of the International Conference  
31 on Harmonisation Tripartite Guideline for Good Clinical Practice (ICH GCP). The study has been  
32 approved by the West of Scotland Research Ethics Service (reference: 18/WS/0080) and  
33 registered on Clinicaltrials.gov (NCT03463694). Any changes in research activity, except those  
34 necessary to remove an apparent, immediate hazard to the participant in the case of an urgent  
35 safety measure, will be reviewed and approved by the Chief Investigator. Amendments will be  
36 submitted to the sponsor for review and authorisation before being submitted in writing to the  
37 appropriate REC, and local R&D for approval prior to participants being enrolled into an  
38 amended protocol. The findings will be disseminated through peer-reviewed publications,  
39 conference presentations and on the study website.  
40  
41  
42  
43  
44  
45

#### 46 **Confidentiality:**

47 All laboratory specimens, evaluation forms, reports, and other records must be identified in a  
48 manner designed to maintain participant confidentiality. All records must be kept in a secure  
49 storage area with limited access. Clinical information will not be released without the written  
50 permission of the participant's parent/guardian. The Investigator and study site staff involved  
51 with this study may not disclose or use for any purpose other than performance of the study,  
52 any data, record, or other unpublished, confidential information disclosed to those individuals for  
53 the purpose of the study. Prior written agreement from the sponsor or its designee must be  
54 obtained for the disclosure of any said confidential information to other parties.  
55  
56  
57  
58  
59  
60

1  
2 All Investigators and study site staff involved with this study must comply with the requirements  
3 of General Data Protection Regulations with regard to the collection, storage, processing and  
4 disclosure of personal information and will uphold the Act's core principles. Access to collated  
5 participant data will be restricted to individuals from the research team treating the participants,  
6 representatives of the sponsor(s) and representatives of regulatory authorities. Computers used  
7 to collate the data will have limited access measures via user names and passwords. Published  
8 results will not contain any personal data that could allow identification of individual participants.  
9  
10  
11  
12

13  
14 **Patient and Public involvement (PPI):** Feedback was obtained from PPI representatives on  
15 the study protocol, information sheets, diaries and consent forms and necessary modifications  
16 made prior to starting the study. A PPI representative is also invited to attend the trial steering  
17 committee meetings.  
18  
19

20  
21 **Access to data:**

22 Ownership of the data arising from this study resides with the study team. On completion of the  
23 study, the study data will be analysed and tabulated, and a clinical study report will be prepared  
24 in accordance with ICH guidelines.  
25  
26  
27

28 **Trial status:**

29 This paper describes study protocol version V4 (06/01/2020). The trial opened on 02 November  
30 2018. The first participant was recruited on 6<sup>th</sup> November 2018. The planned study end date is  
31 30 November 2021. At the time of submission, study recruitment was suspended due to the  
32 COVID-19 pandemic.  
33  
34  
35

36 **Discussion:**

37 The study is based on the recently discovered evidence that epithelial cells have an innate  
38 antiviral effect <sup>11</sup>. This effect can be augmented by supplying the cells with chloride ion through  
39 NaCl. Saline, commonly used as a placebo cannot be used in that role here as it contains NaCl  
40 – the substrate being tested. We are hence measuring viral shedding as an independent  
41 measure of any antiviral effect. The results from this trial will help determine if a simple and low-  
42 cost intervention could help reduce the duration of symptoms of URTI in children. Changes to  
43 the duration of individual symptoms, wheeze, transmission within the household, over-the-  
44 counter medication use, need for further treatment, days lost and cost of illness are all  
45 secondary outcomes.  
46  
47  
48  
49  
50

51 **Conclusion:**

52 Since numerous viruses can cause URTI and in the absence of an antiviral agent/vaccine  
53 against the vast majority of viruses, if successful, this low cost and easily accessible  
54 intervention can easily be rolled out globally.  
55  
56  
57  
58  
59

60 **References:**

1. Toivonen L, Schuez-Havupalo L, Karppinen S, et al. Rhinovirus Infections in the First 2 Years of Life. *Pediatrics* 2016;138(3) doi: 10.1542/peds.2016-1309
2. Tarafder MR, Carabin H, Gyorkos TW, et al. Diarrhea and colds in child day care centers: impact of various numerator and denominator definitions of illness episodes. *Epidemiology* 2009;20(6):796-9. doi: 10.1097/EDE.0b013e3181ba468e
3. Gruber C, Keil T, Kulig M, et al. History of respiratory infections in the first 12 yr among children from a birth cohort. *Pediatr Allergy Immunol* 2008;19(6):505-12. doi: 10.1111/j.1399-3038.2007.00688.x
4. Ramalingam S, Graham C, Dove J, et al. A pilot, open labelled, randomised controlled trial of hypertonic saline nasal irrigation and gargling for the common cold. *Sci Rep* 2019;9(1):1015. doi: 10.1038/s41598-018-37703-3
5. Scotland I. How often do people in Scotland consult their GP practice and why? Reasons for consulting the GP practice: Top 10 most common conditions seen. (2012/2013 29/10/2013 2013) [Available from: <http://www.isdscotland.org/Health-Topics/General-Practice/GP-Consultations/> accessed 08/02/2016 2016.
6. Scotland I. Annual Acute Hospital Activity and NHS Beds Information in Scotland - Year ending 31 March 2016 [Available from: <https://www.isdscotland.org/Health-Topics/Hospital-Care/Publications/data-tables.asp?id=8582016>.
7. Schuez-Havupalo L, Karppinen S, Toivonen L, et al. Association between infant swimming and rhinovirus-induced wheezing. *Acta Paediatr* 2014;103(11):1153-8. doi: 10.1111/apa.12736
8. Green CA, Yeates D, Goldacre A, et al. Admission to hospital for bronchiolitis in England: trends over five decades, geographical variation and association with perinatal characteristics and subsequent asthma. *Arch Dis Child* 2016;101(2):140-6. doi: 10.1136/archdischild-2015-308723
9. le Roux DM, Myer L, Nicol MP, et al. Incidence and severity of childhood pneumonia in the first year of life in a South African birth cohort: the Drakenstein Child Health Study. *Lancet Glob Health* 2015;3(2):e95-e103. doi: 10.1016/S2214-109X(14)70360-2
10. Common Cold: Centre for Disease Control; [updated 06/02/2020. accessed 01/06/2020 2020.
11. Ramalingam S, Cai B, Wong J, et al. Antiviral innate immune response in non-myeloid cells is augmented by chloride ions via an increase in intracellular hypochlorous acid levels. *Sci Rep* 2018;8(1):13630. doi: 10.1038/s41598-018-31936-y
12. Kim HJ, Lee JG, Kang JW, et al. Effects of a low concentration hypochlorous Acid nasal irrigation solution on bacteria, fungi, and virus. *Laryngoscope* 2008;118(10):1862-7. doi: 10.1097/MLG.0b013e31817f4d34
13. Yu MS, Park HW, Kwon HJ, et al. The effect of a low concentration of hypochlorous acid on rhinovirus infection of nasal epithelial cells. *Am J Rhinol Allergy* 2011;25(1):40-4. doi: 10.2500/ajra.2011.25.3545
14. Rutala WA, Weber DJ. Uses of inorganic hypochlorite (bleach) in health-care facilities. *Clin Microbiol Rev* 1997;10(4):597-610.
15. Jordan WE, Jones DV, Klein M. Antiviral effectiveness of chlorine bleach in household laundry use. *Am J Dis Child* 1969;117(3):313-6.
16. Castela C, da Silva AP, Matos A, et al. Association of myeloperoxidase polymorphism (G463A) with cervix cancer. *Mol Cell Biochem* 2015;404(1-2):1-4. doi: 10.1007/s11010-015-2359-5
17. Winterbourn CC, Kettle AJ. Redox reactions and microbial killing in the neutrophil phagosome. *Antioxid Redox Signal* 2013;18(6):642-60. doi: 10.1089/ars.2012.4827
18. Chen X, Lee KA, Ha EM, et al. A specific and sensitive method for detection of hypochlorous acid for the imaging of microbe-induced HOCl production. *Chem Commun (Camb)* 2011;47(15):4373-5. doi: 10.1039/c1cc10589b
19. Jantsch J, Schatz V, Friedrich D, et al. Cutaneous Na<sup>+</sup> storage strengthens the antimicrobial barrier function of the skin and boosts macrophage-driven host defense. *Cell Metab* 2015;21(3):493-501. doi: 10.1016/j.cmet.2015.02.003
20. Minton K. Antibacterial immunity: a pinch of salt. *Nat Rev Immunol* 2015;15(4):202. doi: 10.1038/nri3835
21. Zhang L, Mendoza-Sassi RA, Wainwright C, et al. Nebulised hypertonic saline solution for acute bronchiolitis in infants. *Cochrane Database Syst Rev* 2013(7):CD006458. doi: 10.1002/14651858.CD006458.pub3



- 1  
2  
3  
4  
5  
6  
7  
8  
9  
10  
11  
12  
13  
14  
15  
16  
17  
18  
19  
20  
21  
22  
23  
24  
25  
26  
27  
28  
29  
30  
31  
32  
33  
34  
35  
36  
37  
38  
39  
40  
41  
42  
43  
44  
45  
46  
47  
48  
49  
50  
51  
52  
53  
54  
55  
56  
57  
58  
59  
60
22. Zhang L, Mendoza-Sassi RA, Klassen TP, et al. Nebulized Hypertonic Saline for Acute Bronchiolitis: A Systematic Review. *Pediatrics* 2015;136(4):687-701. doi: 10.1542/peds.2015-1914
  23. Silver AH, Esteban-Cruciani N, Azzarone G, et al. 3% Hypertonic Saline Versus Normal Saline in Inpatient Bronchiolitis: A Randomized Controlled Trial. *Pediatrics* 2015;136(6):1036-43. doi: 10.1542/peds.2015-1037
  24. Everard ML, Hind D, Ugonna K, et al. SABRE: a multicentre randomised control trial of nebulised hypertonic saline in infants hospitalised with acute bronchiolitis. *Thorax* 2014;69(12):1105-12. doi: 10.1136/thoraxjnl-2014-205953
  25. Cunningham S, Unger SA. Nebulised hypertonic saline in bronchiolitis: take it with a pinch of salt. *Thorax* 2014;69(12):1065-6. doi: 10.1136/thoraxjnl-2014-206210
  26. Grewal S, Klassen TP. The tale of 2 trials: disentangling contradictory evidence on hypertonic saline for acute bronchiolitis. *JAMA Pediatr* 2014;168(7):607-9. doi: 10.1001/jamapediatrics.2014.423
  27. Baron J, El-Chaar G. Hypertonic Saline for the Treatment of Bronchiolitis in Infants and Young Children: A Critical Review of the Literature. *J Pediatr Pharmacol Ther* 2016;21(1):7-26. doi: 10.5863/1551-6776-21.1.7
  28. Badgett RG, Vindhya M, Stirnaman JT, et al. A Living Systematic Review of Nebulized Hypertonic Saline for Acute Bronchiolitis in Infants. *JAMA Pediatr* 2015;169(8):788-9. doi: 10.1001/jamapediatrics.2015.0681
  29. Slapak I, Skoupa J, Strnad P, et al. Efficacy of isotonic nasal wash (seawater) in the treatment and prevention of rhinitis in children. *Arch Otolaryngol Head Neck Surg* 2008;134(1):67-74. doi: 10.1001/archoto.2007.19
  30. Koksall T, Cizmeci MN, Bozkaya D, et al. Comparison between the use of saline and seawater for nasal obstruction in children under 2 years of age with acute upper respiratory infection. *Turk J Med Sci* 2016;46(4):1004-13. doi: 10.3906/sag-1507-18
  31. Kassel JC, King D, Spurling GK. Saline nasal irrigation for acute upper respiratory tract infections. *Cochrane Database Syst Rev* 2010(3):CD006821. doi: 10.1002/14651858.CD006821.pub2
  32. Jacobs B, Young NL, Dick PT, et al. Canadian Acute Respiratory Illness and Flu Scale (CARIFS): development of a valid measure for childhood respiratory infections. *J Clin Epidemiol* 2000;53(8):793-9.

#### Authors' contributions:

Sandeep Ramalingam – Planned the study and wrote the protocol

Catriona Graham – Planned the study, revised protocol and approved the final manuscript.

Katherine Oatey – Revised protocol, obtained approvals and approved the final manuscript.

Phillip Rayson – Revised protocol, obtained approvals and approved the final manuscript.

Andrew Stoddart – Revised protocol and approved the final manuscript.

Aziz Sheikh – Planned the study and revised protocol and approved the final manuscript.

Steve Cunningham - Planned the study and revised protocol and approved the final manuscript.

#### Acknowledgements:

The ELVIS Kids Trial Investigators are:

Chief Investigator: Sandeep Ramalingam

Children's Clinical Research Facility (Edinburgh): Brittney Abernathy, Julie Baggot, Ruaridh Buchan, Gillian Black, Steve Cunningham, Louise Frampton, Naomi Matos, Elinore McGivern, Rachel McKernan, Debbie Miller, Margaret Millar, Sheila Mortimer, Finny Paterson, Maxine Ramsay, Joan Thomson, Emma Ward, Jacqueline Waters.

1  
2 Department of Laboratory Medicine, Royal Infirmary of Edinburgh: Alistair Scott, Jenny Dove,  
3 Marianne Cunningham, Lisa Marie Wilson  
4

5 Edinburgh Clinical Trials Unit (ECTU): Ruth Armstrong, Christine Campbell, Gina Cranswick,  
6 Ronnie Harkess, Lynsey Milne, Katherine Oatey, Phillip Rayson, Pamela Sinclair, Michelle  
7 Steven, Andy Stoddart.  
8

9  
10 Pharmacy NHS Lothian. Ruaridh Buchan, Jacqueline Waters

11 Usher Institute: Aziz Sheikh

12  
13 Edinburgh Clinical Research Facility: Emily Evans, Catriona Graham  
14  
15

16 **Funding statement:**

17 This work was supported by the Chief Scientist Office, grant number TCS/17/12. The funder had  
18 no role in the design of this study and will not have any role during its execution, analyses,  
19 interpretation of the data, or decision to submit results. Sea Salt was provided by Cornish Sea  
20 Salt Company. Swabs and transport medium were supplied by Copan, Italy. Both Cornish Sea  
21 Salt Company and Copan, Italy had no role in the design of this study and will not have any role  
22 during its execution, analyses, interpretation of the data, or decision to submit results. AS is  
23 supported by HDR UK and BREATHE - The Health Data Research Hub for Respiratory Health  
24 [MC\_PC\_19004]. BREATHE is funded through the UK Research and Innovation Industrial  
25 Strategy Challenge Fund.  
26  
27  
28  
29  
30  
31

32 **Competing interests statement:** No conflicts of interest to declare  
33  
34  
35  
36  
37  
38  
39  
40  
41  
42  
43  
44  
45  
46  
47  
48  
49  
50  
51  
52  
53  
54  
55  
56  
57  
58  
59  
60

**Table 1:**

| Study timepoints                                   | Pre-Screening | Baseline | Day 1 | Day 2 | Day 3 | Day 4 | Day 5 | Day 5-8 | Days 5-28 (as applicable) | Day 28 |
|----------------------------------------------------|---------------|----------|-------|-------|-------|-------|-------|---------|---------------------------|--------|
| Pre-Screening                                      | X             |          |       |       |       |       |       |         |                           |        |
| Informed Consent                                   |               | X        |       |       |       |       |       |         |                           |        |
| Eligibility Criteria                               |               | X        |       |       |       |       |       |         |                           |        |
| Eligibility review if change in health information |               |          | X     |       |       |       |       |         |                           |        |
| Randomisation/Treatment Allocation                 |               | X        |       |       |       |       |       |         |                           |        |
| Baseline Case Report Form                          |               | X        |       |       |       |       |       |         |                           |        |
| Nose Swab collection (if child remains unwell)     |               |          | X     | X     | X     | X     | X     |         |                           |        |
| Nose Swab return                                   |               |          |       |       |       |       |       | X       |                           |        |
| Intervention arm - HS Drops                        |               |          | X     | X     | X     | X     | X     |         | X                         |        |
| Daily diary                                        |               |          | X     | X     | X     | X     | X     |         | X                         |        |
| Adverse Events                                     |               |          | X     | X     | X     | X     | X     |         | X                         |        |
| End of illness diary                               |               |          |       |       |       |       |       |         |                           | ← →    |
| Satisfaction questionnaire                         |               |          |       |       |       |       |       |         |                           | ← →    |
| Return of diaries                                  |               |          |       |       |       |       |       |         | X                         |        |
| Day 28 Wheeze question                             |               |          |       |       |       |       |       |         |                           | X      |

Figure 1: ELVIS Kids Patient Pathway when the child has a URTI at recruitment

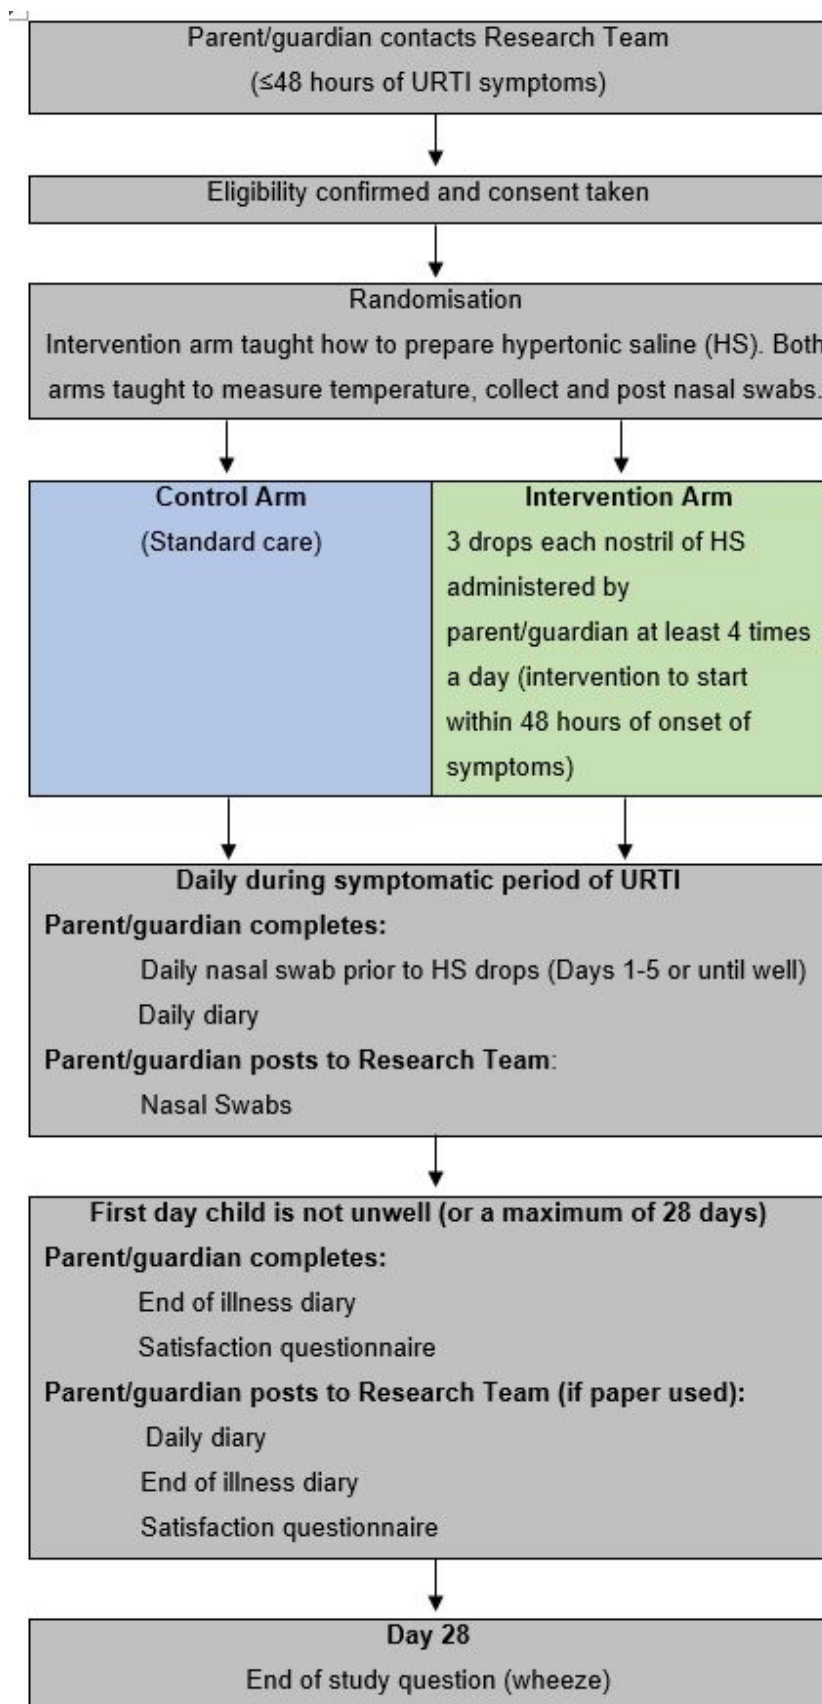

Figure 2: ELVIS Kids Patient Pathway when the child does not have a URTI at recruitment

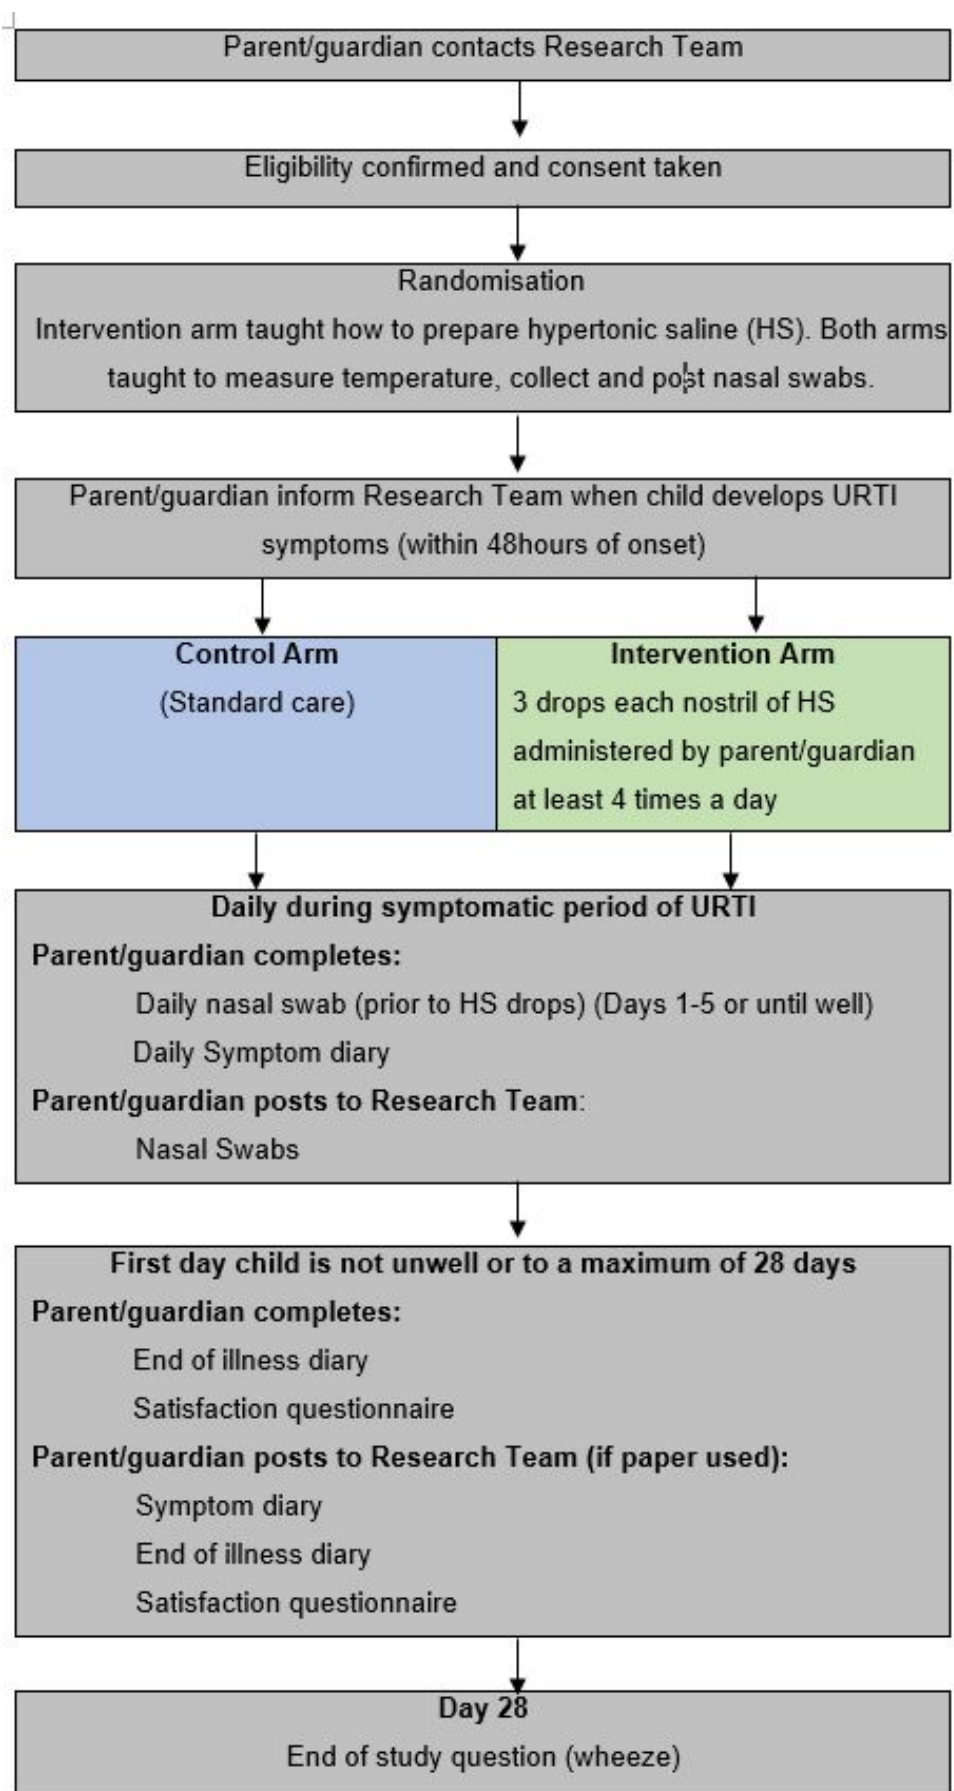

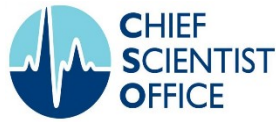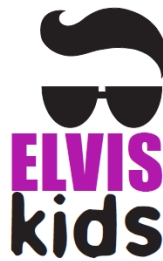

<INSERT  
TRUST  
LOGO>

## ELVIS Kids: Information Sheet for children

**Hello, this is ELVIS. He has a Cold!**

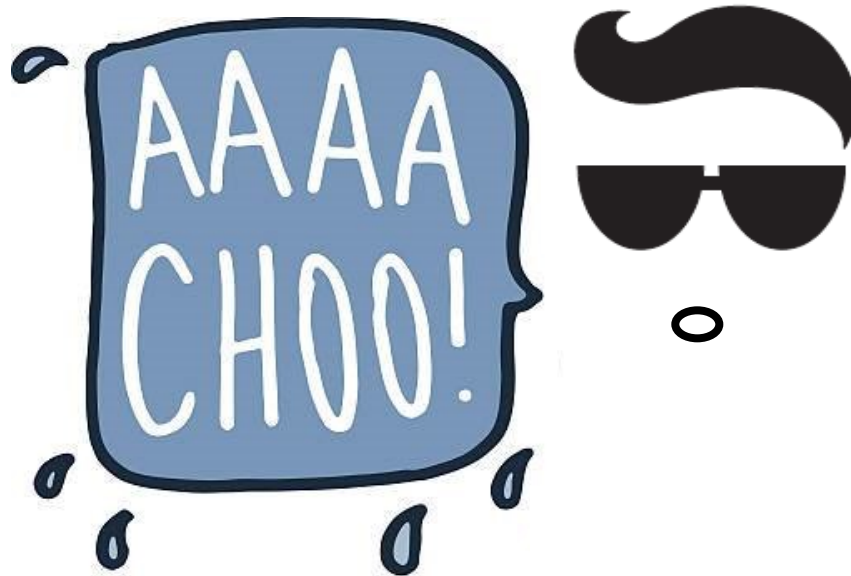

**Elvis does not like a cold.**

**It makes him cough, his nose runs, and he is too tired to play.**

**He wishes there was a cure for the cold!**

**So, Elvis goes to meet the nurse in the hospital to take part in a study.**

1  
2  
3  
4 **The nurse tells Elvis that he will need to**  
5 **take a swab from his nose for a few**  
6 **days. This is like a cotton bud wiping**  
7 **the inside of his nose. This won't hurt**  
8 **but might tickle a bit!**  
9  
10  
11  
12  
13  
14

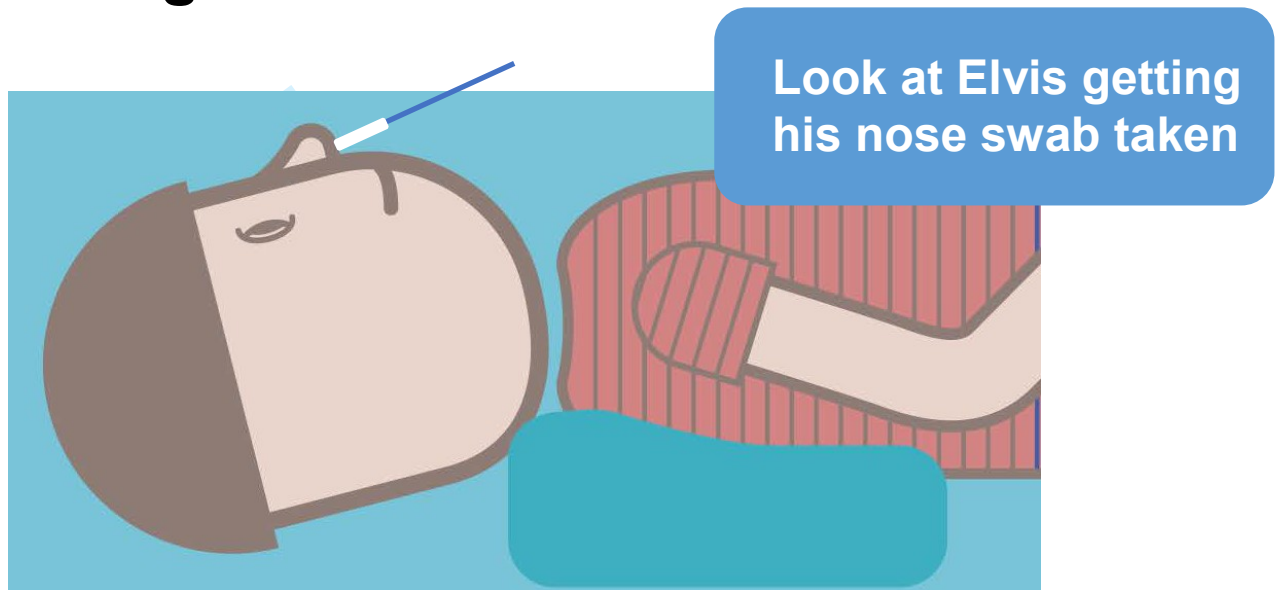

15  
16  
17  
18  
19  
20  
21  
22  
23  
24  
25  
26  
27  
28  
29  
30  
31  
32  
33  
34 **The nurse tells Elvis that he may be in**  
35 **the group of children that need nose**  
36 **drops for their cold until they are well.**  
37  
38  
39  
40  
41

42  
43 **If he is, he will lie down and a few**  
44 **drops of water will be put up his nose**  
45 **by a grown up in his family. This might**  
46 **be tickly or make him want to blow his**  
47 **nose. He will do this every day until his**  
48 **cold gets better.**  
49  
50  
51  
52  
53  
54  
55  
56  
57  
58  
59  
60

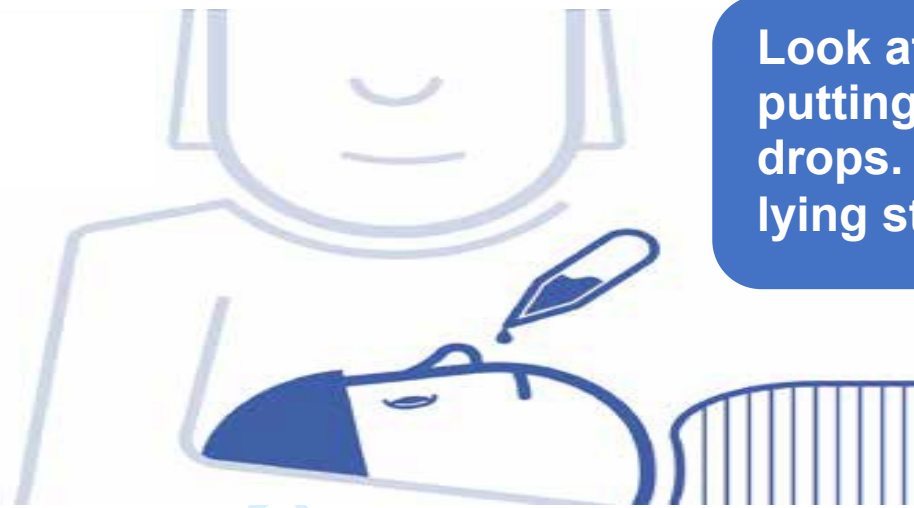

Look at Elvis's Mum putting in his nose drops. He is good at lying still!

**Not all the children helping with the study will use nose drops. The nurse will look at their computer to see which children will get them.**

**The nurse tells Elvis that he doesn't have to take part if he doesn't want to and he can change his mind later if he wants. He just needs to tell a grown up.**

**The nurse thanks Elvis for his interest in the study.**

**Do you want to be like Elvis and help the nurse too?**

**What is your name: \_\_\_\_\_**



1  
2  
3  
4 **Colour in this picture of Elvis's Teddy**  
5 **who is visiting the nurse too:**  
6  
7  
8  
9  
10  
11  
12  
13  
14  
15  
16  
17  
18  
19  
20  
21  
22  
23  
24  
25  
26  
27  
28  
29  
30  
31  
32  
33  
34  
35  
36  
37  
38  
39  
40  
41  
42  
43  
44  
45  
46  
47  
48  
49  
50  
51  
52  
53  
54  
55  
56  
57  
58  
59  
60

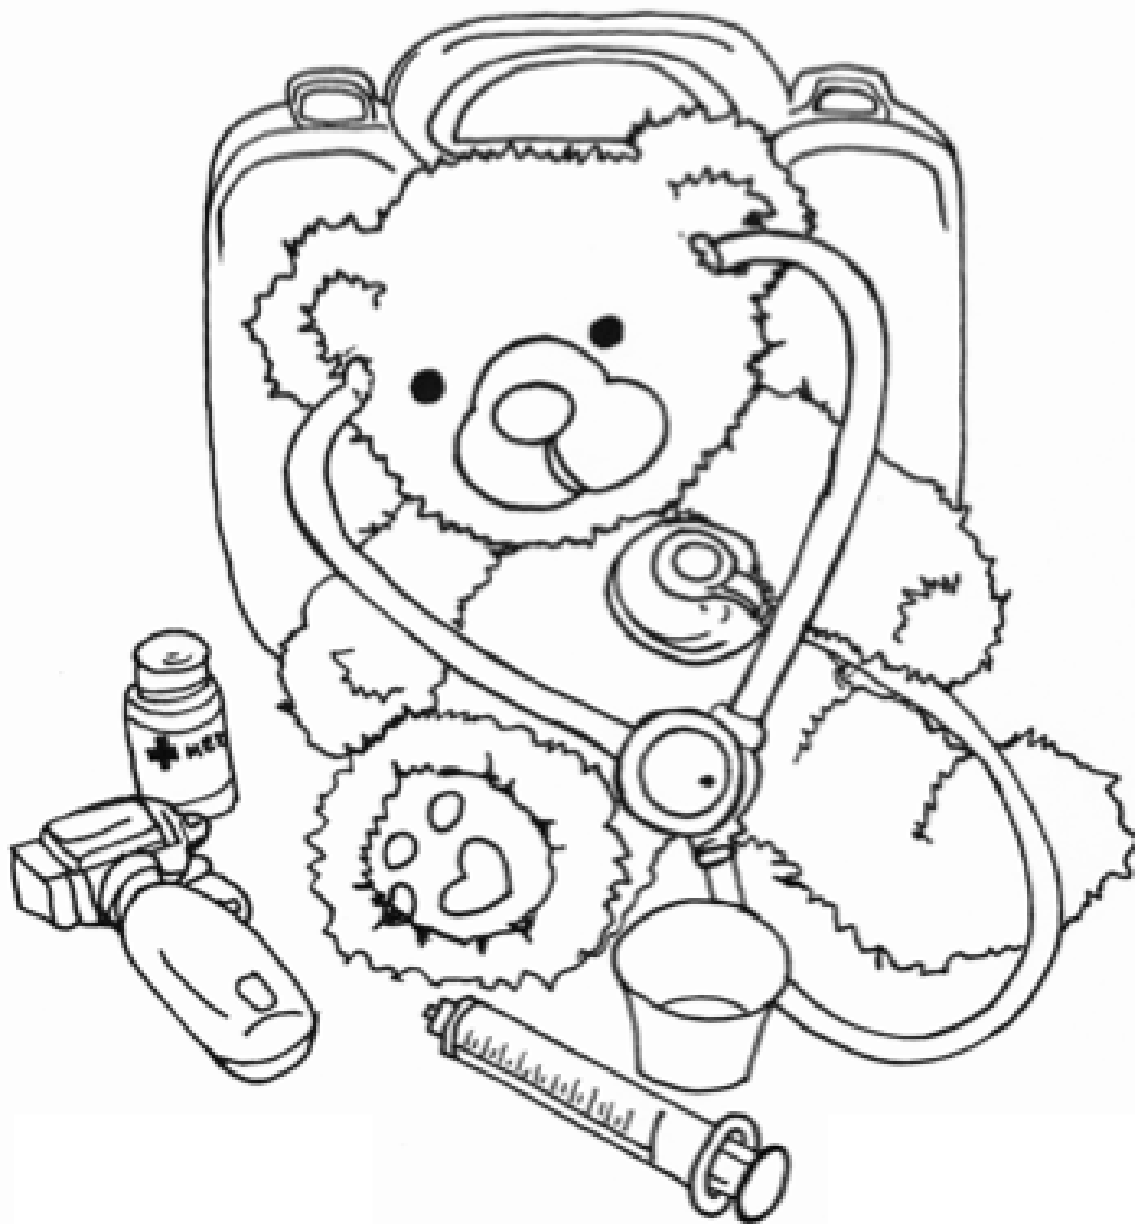

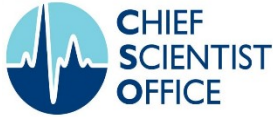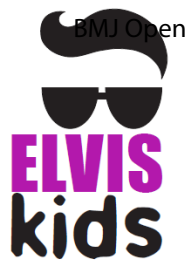

<INSERT TRUST LOGO>

### ELVIS Kids: Assent Form for children

| Child to tick all they agree with:                            | Participant Number: |                                                          |
|---------------------------------------------------------------|---------------------|----------------------------------------------------------|
| Do you understand what this study is about?                   |                     | Yes <input type="checkbox"/> No <input type="checkbox"/> |
| Have you asked all the questions you want?                    |                     | Yes <input type="checkbox"/> No <input type="checkbox"/> |
| Have you had your questions answered in a way you understand? |                     | Yes <input type="checkbox"/> No <input type="checkbox"/> |
| Are you happy to take part?                                   |                     | Yes <input type="checkbox"/> No <input type="checkbox"/> |

If any answers are 'no' or you don't want to take part, don't sign your name!

If you do want to take part, you can write your name below:

Your name \_\_\_\_\_

Date \_\_\_\_\_

The nurse who explained this project to you needs to sign too:

Print Name \_\_\_\_\_

Sign \_\_\_\_\_

Date \_\_\_\_\_

## Thank you for your help!

<INSERT  
TRUST LOGO>

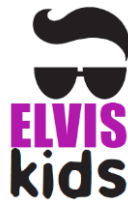

Participant Number:

| CONSENT FORM: ELVIS Kids |                                                                                                                                                                                                                                                                                                                                                                                                                                                  | Please initial box                                       |
|--------------------------|--------------------------------------------------------------------------------------------------------------------------------------------------------------------------------------------------------------------------------------------------------------------------------------------------------------------------------------------------------------------------------------------------------------------------------------------------|----------------------------------------------------------|
| 1.                       | I confirm that I have read and understand the information sheet (Dated: _____ and Version Number _____) for the above study. I have had the opportunity to consider the information, ask questions and have had these questions answered satisfactorily.                                                                                                                                                                                         | <input type="checkbox"/>                                 |
| 2.                       | I understand that my participation and my child's participation is voluntary and that I am free to withdraw at any time without giving any reason and without my child's medical care and/or legal rights being affected.                                                                                                                                                                                                                        | <input type="checkbox"/>                                 |
| 3.                       | I give permission for the study team to access my child's medical records if needed, to collect data on visits to hospital, and treatment received and to check whether they are suitable to take part in the study.                                                                                                                                                                                                                             | <input type="checkbox"/>                                 |
| 4.                       | I understand that relevant sections of my child's medical notes and data collected during the study may be looked at by individuals in the study team, from the Sponsor (University of Edinburgh and/or NHS Lothian), from NHS <INSERT TRUST NAME> or other regulatory authorities where it is relevant to my child taking part in this study. I give permission for these individuals to have access to my child's data and/or medical records. | <input type="checkbox"/>                                 |
| 5.                       | I give permission for my personal information and my child's personal information (including my child's date of birth, and my telephone number and email address) to be passed to the University of Edinburgh for administration of the study.                                                                                                                                                                                                   | <input type="checkbox"/>                                 |
| 6.                       | I understand that the nose swabs collected from my child will be tested to see which bacteria or viruses have caused my child's cold.                                                                                                                                                                                                                                                                                                            | <input type="checkbox"/>                                 |
| 7.                       | I understand that the nose swabs collected from my child may be tested for human DNA to check the samples have been taken correctly.                                                                                                                                                                                                                                                                                                             | <input type="checkbox"/>                                 |
| 8.                       | I agree to my child's anonymised data and nose swabs being kept for use in future ethically approved studies and I understand the samples will be held securely in the Lothian NRS BioResource.                                                                                                                                                                                                                                                  | Yes <input type="checkbox"/> No <input type="checkbox"/> |
| 9.                       | I understand that as part of future ethically approved studies the samples may be tested for human DNA to identify why some children get more infections or why some children have mild and others have severe illness and consent to it.                                                                                                                                                                                                        | Yes <input type="checkbox"/> No <input type="checkbox"/> |
| 10.                      | I agree to my child's General Practitioner being informed of their participation in the study.                                                                                                                                                                                                                                                                                                                                                   | <input type="checkbox"/>                                 |
| 11.                      | I give permission for the trial researchers to contact me by email, phone and text message during the study.                                                                                                                                                                                                                                                                                                                                     | <input type="checkbox"/>                                 |
| 12.                      | I agree that my child will take part in the above study.                                                                                                                                                                                                                                                                                                                                                                                         | <input type="checkbox"/>                                 |

|                                  |      |           |
|----------------------------------|------|-----------|
| Name of Person Giving Consent    | Date | Signature |
| Name of Person Receiving Consent | Date | Signature |

1x original – into Site File; 1x copy – to Participant; 1x copy – into medical record

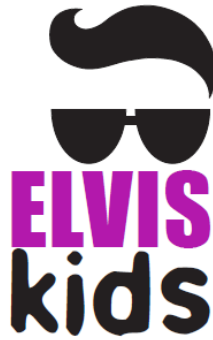

# ELVIS Kids Daily Diary (Intervention Arm)

Thanks for your help with ELVIS Kids!

Participant ID:

## Does my child have a cold?

Your child should have at least two of the cold symptoms listed **OR** one cold symptom and one symptom affecting the whole body to start the study. Please record the symptoms your child has for this cold below.

| Cold Symptoms |                           |                          | Whole body Symptoms                 |                           |                          |                                  |
|---------------|---------------------------|--------------------------|-------------------------------------|---------------------------|--------------------------|----------------------------------|
| Stuffy nose   | <input type="radio"/> Yes | <input type="radio"/> No | Fever ( $\geq 38^{\circ}\text{C}$ ) | <input type="radio"/> Yes | <input type="radio"/> No |                                  |
| Runny nose    | <input type="radio"/> Yes | <input type="radio"/> No | Low energy/tired                    | <input type="radio"/> Yes | <input type="radio"/> No |                                  |
| Cough         | <input type="radio"/> Yes | <input type="radio"/> No | Muscle aches/pains                  | <input type="radio"/> Yes | <input type="radio"/> No | <input type="radio"/> Don't Know |
| Sore throat   | <input type="radio"/> Yes | <input type="radio"/> No | Sore head                           | <input type="radio"/> Yes | <input type="radio"/> No | <input type="radio"/> Don't Know |

## When did the illness start?

*(Please do not start the study if the cold started more than 48 hours ago)*

**Date Started:**   -    -      
(DD-MMM-YYYY)

**Time Started:**   :    
(24 hour clock)

**If your child's medical details have changed since you first saw the study nurses, please contact the study nurses on STUDY NUMBER before starting the study**

## Did your child receive the nasal flu vaccine within the last 4 weeks?

Yes, my child received the nasal flu vaccine       No my child has not received the nasal flu vaccine

**If you answered YES, please contact the study nurses on STUDY NUMBER before starting the study**

**Date Flu Vaccine Received:**   -    -      
(DD-MMM-YYYY)

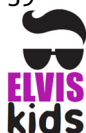

Participant ID:

# Daily Diary: Day 1

Date:   -    -     Time (24 hour clock):   :

|                                        |                        |                                |                    |                               |                             |
|----------------------------------------|------------------------|--------------------------------|--------------------|-------------------------------|-----------------------------|
| <i>Select one option</i>               | <b>Not unwell</b><br>0 | <b>Very mildly</b><br>1      2 | <b>Mildly</b><br>3 | <b>Moderately</b><br>4      5 | <b>Severely</b><br>6      7 |
| <b>How unwell is your child today?</b> |                        |                                |                    |                               |                             |

If you ticked 'Not unwell', please skip the next section and go to the 'Other Questions' section

Are these symptoms a problem for your child today? Tick the most appropriate box for each question:

| Symptom                           | No Problem | Minor Problem | Moderate Problem | Major Problem | Don't Know or N/A |
|-----------------------------------|------------|---------------|------------------|---------------|-------------------|
| Poor appetite                     |            |               |                  |               |                   |
| Not sleeping well                 |            |               |                  |               |                   |
| Irritable, cranky, fussy          |            |               |                  |               |                   |
| Feels unwell                      |            |               |                  |               |                   |
| Low energy, tired                 |            |               |                  |               |                   |
| Not playing well                  |            |               |                  |               |                   |
| Crying more than usual            |            |               |                  |               |                   |
| Needing extra care                |            |               |                  |               |                   |
| Clinginess                        |            |               |                  |               |                   |
| Headache                          |            |               |                  |               |                   |
| Sore throat                       |            |               |                  |               |                   |
| Muscle aches or pains             |            |               |                  |               |                   |
| Fever                             |            |               |                  |               |                   |
| Cough                             |            |               |                  |               |                   |
| Nasal congestion, runny nose      |            |               |                  |               |                   |
| Vomiting                          |            |               |                  |               |                   |
| Not interested in what's going on |            |               |                  |               |                   |
| Unable to get out of bed          |            |               |                  |               |                   |

## Other Questions:

How many times did you give the drops in the last day (24 hours)?

Were there any side effects?  Yes  No

If yes, please indicate the severity of symptoms by ticking the following where 0 is none and 5 is the worst it can be.

| Symptom                | None<br>0 | 1 | 2 | 3 | 4 | Max<br>5 |
|------------------------|-----------|---|---|---|---|----------|
| Runny nose             |           |   |   |   |   |          |
| Sneezing               |           |   |   |   |   |          |
| Pain / Sore            |           |   |   |   |   |          |
| Other symptom 1: _____ |           |   |   |   |   |          |
| Other symptom 2: _____ |           |   |   |   |   |          |
| Other symptom 3: _____ |           |   |   |   |   |          |

Was a nose swab collected this morning?  Yes  No

If no, what was the reason?  I forgot  My child refused  I had problems doing it  Other: \_\_\_\_\_

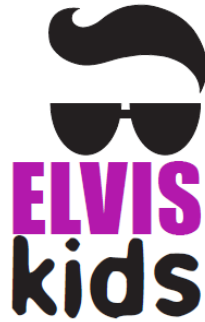

# ELVIS Kids Daily Diary (Control Arm)

Thanks for your help with ELVIS Kids!

Participant ID:

## Does my child have a cold?

Your child should have at least two of the cold symptoms listed **OR** one cold symptom and one symptom affecting the whole body to start the study. Please record the symptoms your child has for this cold below.

| Cold Symptoms |                           |                          | Whole body Symptoms                 |                           |                                                           |
|---------------|---------------------------|--------------------------|-------------------------------------|---------------------------|-----------------------------------------------------------|
| Stuffy nose   | <input type="radio"/> Yes | <input type="radio"/> No | Fever ( $\geq 38^{\circ}\text{C}$ ) | <input type="radio"/> Yes | <input type="radio"/> No                                  |
| Runny nose    | <input type="radio"/> Yes | <input type="radio"/> No | Low energy/tired                    | <input type="radio"/> Yes | <input type="radio"/> No                                  |
| Cough         | <input type="radio"/> Yes | <input type="radio"/> No | Muscle aches/pains                  | <input type="radio"/> Yes | <input type="radio"/> No <input type="radio"/> Don't Know |
| Sore throat   | <input type="radio"/> Yes | <input type="radio"/> No | Sore head                           | <input type="radio"/> Yes | <input type="radio"/> No <input type="radio"/> Don't Know |

## When did the illness start?

*(Please do not start the study if the cold started more than 48 hours ago)*

**Date Started:** --  
*(DD-MMM-YYYY)*

**Time Started:** :  
*(24 hour clock)*

**If your child's medical details have changed since you first saw the study nurses, please contact the study nurses on STUDY NUMBER before starting the study**

## Did your child receive the nasal flu vaccine within the last 4 weeks?

Yes, my child received the nasal flu vaccine       No my child has not received the nasal flu vaccine

**If you answered YES, please contact the study nurses on STUDY NUMBER before starting the study**

**Date Flu Vaccine Received:** --  
*(DD-MMM-YYYY)*

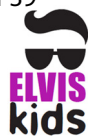Participant ID:     

# Daily Diary: Day 1

Date:   -    -    Time (24 hour clock):   :  

| Select one option               | Not unwell<br>0      | Very mildly<br>1 2   | Mildly<br>3          | Moderately<br>4 5    | Severely<br>6 7      |
|---------------------------------|----------------------|----------------------|----------------------|----------------------|----------------------|
| How unwell is your child today? | <input type="text"/> |

If you ticked 'Not unwell', please skip the next section and go to the 'Other Questions' section

Are these symptoms a problem for your child today? Tick the most appropriate box for each question:

| Symptom                           | No Problem           | Minor Problem        | Moderate Problem     | Major Problem        | Don't Know or N/A    |
|-----------------------------------|----------------------|----------------------|----------------------|----------------------|----------------------|
| Poor appetite                     | <input type="text"/> |
| Not sleeping well                 | <input type="text"/> |
| Irritable, cranky, fussy          | <input type="text"/> |
| Feels unwell                      | <input type="text"/> |
| Low energy, tired                 | <input type="text"/> |
| Not playing well                  | <input type="text"/> |
| Crying more than usual            | <input type="text"/> |
| Needing extra care                | <input type="text"/> |
| Clinginess                        | <input type="text"/> |
| Headache                          | <input type="text"/> |
| Sore throat                       | <input type="text"/> |
| Muscle aches or pains             | <input type="text"/> |
| Fever                             | <input type="text"/> |
| Cough                             | <input type="text"/> |
| Nasal congestion, runny nose      | <input type="text"/> |
| Vomiting                          | <input type="text"/> |
| Not interested in what's going on | <input type="text"/> |
| Unable to get out of bed          | <input type="text"/> |

## Other Questions:

|                                         |                                                                                                                                                           |
|-----------------------------------------|-----------------------------------------------------------------------------------------------------------------------------------------------------------|
| Was a nose swab collected this morning? | <input type="radio"/> Yes <input type="radio"/> No                                                                                                        |
| If no, what was the reason?             | <input type="radio"/> I forgot <input type="radio"/> My child refused <input type="radio"/> I had problems doing it<br><input type="radio"/> Other: _____ |

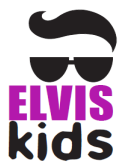

Participant ID:

# End of Illness Diary (*Intervention Arm*)

## END OF ILLNESS DETAILS

Please complete this on the first day your child is well after their cold or after 28 days if your child remains unwell

Date Diary Completed:   -    -      
(DD-MMM-YYYY)

How many adults and children live in the house (including your child who's taking part in ELVIS Kids)?

Adults   Children

Did anybody at home develop the cold after your child?

Yes  No

**If yes, how many were adults?**

**If yes, how many were children?**

How easy was it to apply the nose drops

| Very Easy            | Easy                 | Moderate             | Difficult            | Very Difficult       | Did Not              |
|----------------------|----------------------|----------------------|----------------------|----------------------|----------------------|
| <input type="text"/> |

What was your preferred option?

Cradle child in arms  Lay child on bed  Other: \_\_\_\_\_

Do you think applying nose drops made a difference to your child's symptoms?

Yes  No

Would you do it again if your child had a cold in the future?

Yes  No

**If no, what is the reason? (tick all that apply)**

No improvement  Yes  No

Too difficult  Yes  No

Child did not like it  Yes  No

There were side effects  Yes  No

Other  Yes  No Other: \_\_\_\_\_



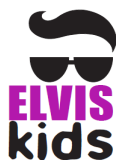

# End of Illness Diary (*Intervention Arm*)

## END OF ILLNESS DETAILS (*continued*)

Did your child take over-the-counter medication for their cold?

Yes  No

*If yes, approximately how much did you spend?*

£ .

Did you seek further medical attention related to the cold?

Yes  No

*If yes, how many times did you use each of the following?*

a. Telephone contact GP?

b. Telephone contact out of hours GP?

c. Telephone contact NHS 24?

d. Attended GP?

e. Attended out of hours GP?

f. GP Home visit?

g. Attended hospital?

h. Was your child admitted to hospital?

Yes  No

*If yes, number of days and what was the reason*

Number of days:  Reason: \_\_\_\_\_

Does your child attend nursery/school?

Yes  No

*If yes, number of days your child missed nursery/school during this cold*

Number of days or work missed by adults to take care of your child

Has your child had wheezing or whistling in the chest while they had this cold?

Yes  No

*If yes, how many days did your child have wheezing or whistling?*

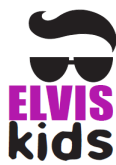Participant ID: 

# End of Illness Diary (*Control Arm*)

## END OF ILLNESS DETAILS

Please complete this on the first day your child is well after their cold or after 28 days if your child remains unwell

Date Diary Completed: --  
(DD-MMM-YYYY)

How many adults and children live in the house (including your child who's taking part in ELVIS Kids)?

Adults  Children

Did anybody at home develop the cold after your child?

Yes  No

*If yes, how many were adults?*

*If yes, how many were children?*

Did you use salt water nose drops/sprays for your child's cold?

Yes  No

*If yes, what is the name of the drops/sprays you used?*

---

*How many days did you use the drops/sprays?*

*How many times per day did you use the drops/sprays?*

Did your child take over-the-counter medication for their cold?

Yes  No

*If yes, approximately how much did you spend?*

£

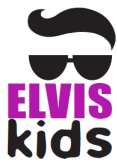

# End of Illness Diary (Control Arm)

## END OF ILLNESS DETAILS (continued)

Did you seek further medical attention related to the cold?

Yes  No

**If yes, how many times did you use each of the following?**

- a. Telephone contact GP?
- b. Telephone contact out of hours GP?
- c. Telephone contact NHS 24?
- d. Attended GP?
- e. Attended out of hours GP?
- f. GP Home visit?
- g. Attended hospital?
- h. Was your child admitted to hospital?

Yes  No

*If yes, number of days and diagnosis*

Number of days:  Diagnosis: \_\_\_\_\_

Does your child attend nursery/school?

Yes  No

**If yes, number of days your child missed nursery/school during this cold**

Number of days or work missed by adults to take care of your child

Has your child had wheezing or whistling in their chest while they had this cold?

Yes  No

**If yes, how many days did your child have wheezing or whistling?**

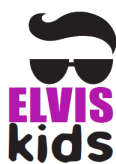

Participant ID:

# Satisfaction Questionnaire

## About the Study

**Q1. How easy was it to collect the swabs?**

| Very Easy | Easy | Moderate | Difficult | Very Difficult | Did Not |
|-----------|------|----------|-----------|----------------|---------|
|           |      |          |           |                |         |

**Q2. How would you rate the comfort level of your child with the swabs?**

| Very Comfortable | Comfortable | Moderately Comfortable | Uncomfortable | Very Uncomfortable | Did Not |
|------------------|-------------|------------------------|---------------|--------------------|---------|
|                  |             |                        |               |                    |         |

**Q3. How easy was it to return samples?**

| Very Easy | Easy | Moderate | Difficult | Very Difficult | Did Not |
|-----------|------|----------|-----------|----------------|---------|
|           |      |          |           |                |         |

**Q4. How easy was it to complete the daily diary?**

| Very Easy | Easy | Moderate | Difficult | Very Difficult | Did Not |
|-----------|------|----------|-----------|----------------|---------|
|           |      |          |           |                |         |

**Q5. Based on your experience, do you have any suggestions for improving the trial procedures in the future?**

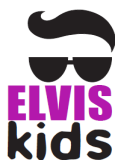

# Day 28 Wheeze Details

## DAY 28 WHEEZE DETAILS

Between your child's cold ending and today, did your child develop wheezing or whistling in their chest?

Yes  No

If yes, how many days did your child have wheezing or whistling?

*(Please enter a number, e.g. 4)*

For peer review only

1  
2  
3  
4  
5  
6  
7  
8  
9  
10  
11  
12  
13  
14  
15  
16  
17  
18  
19  
20  
21  
22  
23  
24  
25  
26  
27  
28  
29  
30  
31  
32  
33  
34  
35  
36  
37  
38  
39  
40  
41  
42  
43  
44  
45  
46  
47  
48  
49  
50  
51  
52  
53  
54  
55  
56  
57  
58  
59  
60

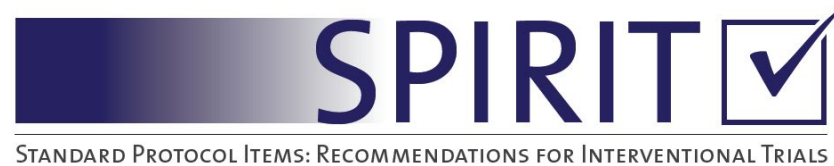

SPIRIT 2013 Checklist: Recommended items to address in a clinical trial protocol and related documents\*

| Section/item                      | Item No | Description                                                                                                                                                                                                                                                                              | Addressed on page number |
|-----------------------------------|---------|------------------------------------------------------------------------------------------------------------------------------------------------------------------------------------------------------------------------------------------------------------------------------------------|--------------------------|
| <b>Administrative information</b> |         |                                                                                                                                                                                                                                                                                          |                          |
| Title                             | 1       | Descriptive title identifying the study design, population, interventions, and, if applicable, trial acronym                                                                                                                                                                             | ___ 1 ___                |
| Trial registration                | 2a      | Trial identifier and registry name. If not yet registered, name of intended registry                                                                                                                                                                                                     | ___ 2 ___                |
|                                   | 2b      | All items from the World Health Organization Trial Registration Data Set                                                                                                                                                                                                                 | ___ 1-18 ___             |
| Protocol version                  | 3       | Date and version identifier                                                                                                                                                                                                                                                              | ___ 12 ___               |
| Funding                           | 4       | Sources and types of financial, material, and other support                                                                                                                                                                                                                              | ___ 15 ___               |
| Roles and responsibilities        | 5a      | Names, affiliations, and roles of protocol contributors                                                                                                                                                                                                                                  | ___ 14 ___               |
|                                   | 5b      | Name and contact information for the trial sponsor                                                                                                                                                                                                                                       | ___ 2,11 ___             |
|                                   | 5c      | Role of study sponsor and funders, if any, in study design; collection, management, analysis, and interpretation of data; writing of the report; and the decision to submit the report for publication, including whether they will have ultimate authority over any of these activities | ___ 11,12 ___            |
|                                   | 5d      | Composition, roles, and responsibilities of the coordinating centre, steering committee, endpoint adjudication committee, data management team, and other individuals or groups overseeing the trial, if applicable (see Item 21a for data monitoring committee)                         | ___ 11 ___               |

|    |                                                           |     |                                                                                                               |                   |
|----|-----------------------------------------------------------|-----|---------------------------------------------------------------------------------------------------------------|-------------------|
| 1  | <b>Introduction</b>                                       |     |                                                                                                               |                   |
| 2  |                                                           |     |                                                                                                               |                   |
| 3  | Background and                                            | 6a  | Description of research question and justification for undertaking the trial, including summary of relevant   | _____ 3-4 _____   |
| 4  | rationale                                                 |     | studies (published and unpublished) examining benefits and harms for each intervention                        |                   |
| 5  |                                                           |     |                                                                                                               |                   |
| 6  |                                                           | 6b  | Explanation for choice of comparators                                                                         | _____ 4 _____     |
| 7  |                                                           |     |                                                                                                               |                   |
| 8  | Objectives                                                | 7   | Specific objectives or hypotheses                                                                             | _____ 4-5 _____   |
| 9  |                                                           |     |                                                                                                               |                   |
| 10 | Trial design                                              | 8   | Description of trial design including type of trial (eg, parallel group, crossover, factorial, single group), |                   |
| 11 |                                                           |     | allocation ratio, and framework (eg, superiority, equivalence, noninferiority, exploratory)                   | _____ 5 _____     |
| 12 |                                                           |     |                                                                                                               |                   |
| 13 |                                                           |     |                                                                                                               |                   |
| 14 | <b>Methods: Participants, interventions, and outcomes</b> |     |                                                                                                               |                   |
| 15 |                                                           |     |                                                                                                               |                   |
| 16 | Study setting                                             | 9   | Description of study settings (eg, community clinic, academic hospital) and list of countries where data will | _____ 5 _____     |
| 17 |                                                           |     | be collected. Reference to where list of study sites can be obtained                                          |                   |
| 18 |                                                           |     |                                                                                                               |                   |
| 19 | Eligibility criteria                                      | 10  | Inclusion and exclusion criteria for participants. If applicable, eligibility criteria for study centres and  | _____ 6 _____     |
| 20 |                                                           |     | individuals who will perform the interventions (eg, surgeons, psychotherapists)                               |                   |
| 21 |                                                           |     |                                                                                                               |                   |
| 22 | Interventions                                             | 11a | Interventions for each group with sufficient detail to allow replication, including how and when they will be | _____ 7 _____     |
| 23 |                                                           |     | administered                                                                                                  |                   |
| 24 |                                                           |     |                                                                                                               |                   |
| 25 |                                                           | 11b | Criteria for discontinuing or modifying allocated interventions for a given trial participant (eg, drug dose  | _____ 7 _____     |
| 26 |                                                           |     | change in response to harms, participant request, or improving/worsening disease)                             |                   |
| 27 |                                                           |     |                                                                                                               |                   |
| 28 |                                                           | 11c | Strategies to improve adherence to intervention protocols, and any procedures for monitoring adherence        | _____ 8 _____     |
| 29 |                                                           |     | (eg, drug tablet return, laboratory tests)                                                                    |                   |
| 30 |                                                           |     |                                                                                                               |                   |
| 31 |                                                           | 11d | Relevant concomitant care and interventions that are permitted or prohibited during the trial                 | _____ 5,6 _____   |
| 32 |                                                           |     |                                                                                                               |                   |
| 33 | Outcomes                                                  | 12  | Primary, secondary, and other outcomes, including the specific measurement variable (eg, systolic blood       | _____ 9,10 _____  |
| 34 |                                                           |     | pressure), analysis metric (eg, change from baseline, final value, time to event), method of aggregation      |                   |
| 35 |                                                           |     | (eg, median, proportion), and time point for each outcome. Explanation of the clinical relevance of chosen    |                   |
| 36 |                                                           |     | efficacy and harm outcomes is strongly recommended                                                            |                   |
| 37 |                                                           |     |                                                                                                               |                   |
| 38 | Participant timeline                                      | 13  | Time schedule of enrolment, interventions (including any run-ins and washouts), assessments, and visits       | _____ 10,16 _____ |
| 39 |                                                           |     | for participants. A schematic diagram is highly recommended (see Figure)                                      |                   |
| 40 |                                                           |     |                                                                                                               |                   |
| 41 |                                                           |     |                                                                                                               |                   |
| 42 |                                                           |     |                                                                                                               |                   |
| 43 |                                                           |     |                                                                                                               |                   |
| 44 |                                                           |     |                                                                                                               |                   |
| 45 |                                                           |     |                                                                                                               |                   |
| 46 |                                                           |     |                                                                                                               |                   |

|   |             |    |                                                                                                                                                                                       |              |
|---|-------------|----|---------------------------------------------------------------------------------------------------------------------------------------------------------------------------------------|--------------|
| 1 | Sample size | 14 | Estimated number of participants needed to achieve study objectives and how it was determined, including clinical and statistical assumptions supporting any sample size calculations | _____10_____ |
| 2 |             |    |                                                                                                                                                                                       |              |
| 3 |             |    |                                                                                                                                                                                       |              |
| 4 | Recruitment | 15 | Strategies for achieving adequate participant enrolment to reach target sample size                                                                                                   | _____5_____  |
| 5 |             |    |                                                                                                                                                                                       |              |

### 6 **Methods: Assignment of interventions (for controlled trials)**

#### 7 Allocation:

|    |                    |     |                                                                                                                                                                                                                                                                                                                                                          |              |
|----|--------------------|-----|----------------------------------------------------------------------------------------------------------------------------------------------------------------------------------------------------------------------------------------------------------------------------------------------------------------------------------------------------------|--------------|
| 8  |                    |     |                                                                                                                                                                                                                                                                                                                                                          |              |
| 9  |                    |     |                                                                                                                                                                                                                                                                                                                                                          |              |
| 10 | Sequence           | 16a | Method of generating the allocation sequence (eg, computer-generated random numbers), and list of any factors for stratification. To reduce predictability of a random sequence, details of any planned restriction (eg, blocking) should be provided in a separate document that is unavailable to those who enrol participants or assign interventions | _____7_____  |
| 11 | generation         |     |                                                                                                                                                                                                                                                                                                                                                          |              |
| 12 |                    |     |                                                                                                                                                                                                                                                                                                                                                          |              |
| 13 |                    |     |                                                                                                                                                                                                                                                                                                                                                          |              |
| 14 |                    |     |                                                                                                                                                                                                                                                                                                                                                          |              |
| 15 |                    |     |                                                                                                                                                                                                                                                                                                                                                          |              |
| 16 | Allocation         | 16b | Mechanism of implementing the allocation sequence (eg, central telephone; sequentially numbered, opaque, sealed envelopes), describing any steps to conceal the sequence until interventions are assigned                                                                                                                                                | _____7_____  |
| 17 | concealment        |     |                                                                                                                                                                                                                                                                                                                                                          |              |
| 18 | mechanism          |     |                                                                                                                                                                                                                                                                                                                                                          |              |
| 19 |                    |     |                                                                                                                                                                                                                                                                                                                                                          |              |
| 20 | Implementation     | 16c | Who will generate the allocation sequence, who will enrol participants, and who will assign participants to interventions                                                                                                                                                                                                                                | _____7_____  |
| 21 |                    |     |                                                                                                                                                                                                                                                                                                                                                          |              |
| 22 |                    |     |                                                                                                                                                                                                                                                                                                                                                          |              |
| 23 |                    |     |                                                                                                                                                                                                                                                                                                                                                          |              |
| 24 | Blinding (masking) | 17a | Who will be blinded after assignment to interventions (eg, trial participants, care providers, outcome assessors, data analysts), and how                                                                                                                                                                                                                | _____7_____  |
| 25 |                    |     |                                                                                                                                                                                                                                                                                                                                                          |              |
| 26 |                    |     |                                                                                                                                                                                                                                                                                                                                                          |              |
| 27 |                    | 17b | If blinded, circumstances under which unblinding is permissible, and procedure for revealing a participant's allocated intervention during the trial                                                                                                                                                                                                     | _____NA_____ |
| 28 |                    |     |                                                                                                                                                                                                                                                                                                                                                          |              |
| 29 |                    |     |                                                                                                                                                                                                                                                                                                                                                          |              |
| 30 |                    |     |                                                                                                                                                                                                                                                                                                                                                          |              |

### 31 **Methods: Data collection, management, and analysis**

|    |                 |     |                                                                                                                                                                                                                                                                                                                                                                                                              |                     |
|----|-----------------|-----|--------------------------------------------------------------------------------------------------------------------------------------------------------------------------------------------------------------------------------------------------------------------------------------------------------------------------------------------------------------------------------------------------------------|---------------------|
| 32 |                 |     |                                                                                                                                                                                                                                                                                                                                                                                                              |                     |
| 33 | Data collection | 18a | Plans for assessment and collection of outcome, baseline, and other trial data, including any related processes to promote data quality (eg, duplicate measurements, training of assessors) and a description of study instruments (eg, questionnaires, laboratory tests) along with their reliability and validity, if known. Reference to where data collection forms can be found, if not in the protocol | _____8,10-12_____   |
| 34 | methods         |     |                                                                                                                                                                                                                                                                                                                                                                                                              |                     |
| 35 |                 |     |                                                                                                                                                                                                                                                                                                                                                                                                              |                     |
| 36 |                 |     |                                                                                                                                                                                                                                                                                                                                                                                                              |                     |
| 37 |                 |     |                                                                                                                                                                                                                                                                                                                                                                                                              |                     |
| 38 |                 | 18b | Plans to promote participant retention and complete follow-up, including list of any outcome data to be collected for participants who discontinue or deviate from intervention protocols                                                                                                                                                                                                                    | _____7,8,10-12_____ |
| 39 |                 |     |                                                                                                                                                                                                                                                                                                                                                                                                              |                     |
| 40 |                 |     |                                                                                                                                                                                                                                                                                                                                                                                                              |                     |
| 41 |                 |     |                                                                                                                                                                                                                                                                                                                                                                                                              |                     |
| 42 |                 |     |                                                                                                                                                                                                                                                                                                                                                                                                              |                     |



|    |                                 |     |                                                                                                                                                                                                                                                                                                                                       |               |
|----|---------------------------------|-----|---------------------------------------------------------------------------------------------------------------------------------------------------------------------------------------------------------------------------------------------------------------------------------------------------------------------------------------|---------------|
| 1  | Data management                 | 19  | Plans for data entry, coding, security, and storage, including any related processes to promote data quality (eg, double data entry; range checks for data values). Reference to where details of data management procedures can be found, if not in the protocol                                                                     | ___ 6,10 ___  |
| 2  |                                 |     |                                                                                                                                                                                                                                                                                                                                       |               |
| 3  |                                 |     |                                                                                                                                                                                                                                                                                                                                       |               |
| 4  |                                 |     |                                                                                                                                                                                                                                                                                                                                       |               |
| 5  | Statistical methods             | 20a | Statistical methods for analysing primary and secondary outcomes. Reference to where other details of the statistical analysis plan can be found, if not in the protocol                                                                                                                                                              | ___ 10,11 ___ |
| 6  |                                 |     |                                                                                                                                                                                                                                                                                                                                       |               |
| 7  |                                 |     |                                                                                                                                                                                                                                                                                                                                       |               |
| 8  |                                 | 20b | Methods for any additional analyses (eg, subgroup and adjusted analyses)                                                                                                                                                                                                                                                              | ___ 11 ___    |
| 9  |                                 |     |                                                                                                                                                                                                                                                                                                                                       |               |
| 10 |                                 | 20c | Definition of analysis population relating to protocol non-adherence (eg, as randomised analysis), and any statistical methods to handle missing data (eg, multiple imputation)                                                                                                                                                       | ___ 11 ___    |
| 11 |                                 |     |                                                                                                                                                                                                                                                                                                                                       |               |
| 12 |                                 |     |                                                                                                                                                                                                                                                                                                                                       |               |
| 13 |                                 |     |                                                                                                                                                                                                                                                                                                                                       |               |
| 14 | <b>Methods: Monitoring</b>      |     |                                                                                                                                                                                                                                                                                                                                       |               |
| 15 |                                 |     |                                                                                                                                                                                                                                                                                                                                       |               |
| 16 | Data monitoring                 | 21a | Composition of data monitoring committee (DMC); summary of its role and reporting structure; statement of whether it is independent from the sponsor and competing interests; and reference to where further details about its charter can be found, if not in the protocol. Alternatively, an explanation of why a DMC is not needed | ___ 11 ___    |
| 17 |                                 |     |                                                                                                                                                                                                                                                                                                                                       |               |
| 18 |                                 |     |                                                                                                                                                                                                                                                                                                                                       |               |
| 19 |                                 |     |                                                                                                                                                                                                                                                                                                                                       |               |
| 20 |                                 |     |                                                                                                                                                                                                                                                                                                                                       |               |
| 21 |                                 |     |                                                                                                                                                                                                                                                                                                                                       |               |
| 22 |                                 | 21b | Description of any interim analyses and stopping guidelines, including who will have access to these interim results and make the final decision to terminate the trial                                                                                                                                                               | ___ NA ___    |
| 23 |                                 |     |                                                                                                                                                                                                                                                                                                                                       |               |
| 24 |                                 |     |                                                                                                                                                                                                                                                                                                                                       |               |
| 25 | Harms                           | 22  | Plans for collecting, assessing, reporting, and managing solicited and spontaneously reported adverse events and other unintended effects of trial interventions or trial conduct                                                                                                                                                     | ___ 5,10 ___  |
| 26 |                                 |     |                                                                                                                                                                                                                                                                                                                                       |               |
| 27 |                                 |     |                                                                                                                                                                                                                                                                                                                                       |               |
| 28 | Auditing                        | 23  | Frequency and procedures for auditing trial conduct, if any, and whether the process will be independent from investigators and the sponsor                                                                                                                                                                                           | ___ NA ___    |
| 29 |                                 |     |                                                                                                                                                                                                                                                                                                                                       |               |
| 30 |                                 |     |                                                                                                                                                                                                                                                                                                                                       |               |
| 31 |                                 |     |                                                                                                                                                                                                                                                                                                                                       |               |
| 32 | <b>Ethics and dissemination</b> |     |                                                                                                                                                                                                                                                                                                                                       |               |
| 33 |                                 |     |                                                                                                                                                                                                                                                                                                                                       |               |
| 34 | Research ethics approval        | 24  | Plans for seeking research ethics committee/institutional review board (REC/IRB) approval                                                                                                                                                                                                                                             | ___ 11 ___    |
| 35 |                                 |     |                                                                                                                                                                                                                                                                                                                                       |               |
| 36 |                                 |     |                                                                                                                                                                                                                                                                                                                                       |               |
| 37 | Protocol amendments             | 25  | Plans for communicating important protocol modifications (eg, changes to eligibility criteria, outcomes, analyses) to relevant parties (eg, investigators, REC/IRBs, trial participants, trial registries, journals, regulators)                                                                                                      | ___ 11 ___    |
| 38 |                                 |     |                                                                                                                                                                                                                                                                                                                                       |               |
| 39 |                                 |     |                                                                                                                                                                                                                                                                                                                                       |               |
| 40 |                                 |     |                                                                                                                                                                                                                                                                                                                                       |               |
| 41 |                                 |     |                                                                                                                                                                                                                                                                                                                                       |               |
| 42 |                                 |     |                                                                                                                                                                                                                                                                                                                                       |               |
| 43 |                                 |     |                                                                                                                                                                                                                                                                                                                                       |               |
| 44 |                                 |     |                                                                                                                                                                                                                                                                                                                                       |               |
| 45 |                                 |     |                                                                                                                                                                                                                                                                                                                                       |               |
| 46 |                                 |     |                                                                                                                                                                                                                                                                                                                                       |               |

|    |                               |     |                                                                                                                                                                                                                                                                                     |                   |
|----|-------------------------------|-----|-------------------------------------------------------------------------------------------------------------------------------------------------------------------------------------------------------------------------------------------------------------------------------------|-------------------|
| 1  | Consent or assent             | 26a | Who will obtain informed consent or assent from potential trial participants or authorised surrogates, and how (see Item 32)                                                                                                                                                        | _____ 6,7 _____   |
| 2  |                               |     |                                                                                                                                                                                                                                                                                     |                   |
| 3  |                               |     |                                                                                                                                                                                                                                                                                     |                   |
| 4  |                               | 26b | Additional consent provisions for collection and use of participant data and biological specimens in ancillary studies, if applicable                                                                                                                                               | _____ 6,7 _____   |
| 5  |                               |     |                                                                                                                                                                                                                                                                                     |                   |
| 6  |                               |     |                                                                                                                                                                                                                                                                                     |                   |
| 7  | Confidentiality               | 27  | How personal information about potential and enrolled participants will be collected, shared, and maintained in order to protect confidentiality before, during, and after the trial                                                                                                | _____ 11,12 _____ |
| 8  |                               |     |                                                                                                                                                                                                                                                                                     |                   |
| 9  |                               |     |                                                                                                                                                                                                                                                                                     |                   |
| 10 | Declaration of interests      | 28  | Financial and other competing interests for principal investigators for the overall trial and each study site                                                                                                                                                                       | _____ 15 _____    |
| 11 |                               |     |                                                                                                                                                                                                                                                                                     |                   |
| 12 |                               |     |                                                                                                                                                                                                                                                                                     |                   |
| 13 | Access to data                | 29  | Statement of who will have access to the final trial dataset, and disclosure of contractual agreements that limit such access for investigators                                                                                                                                     | _____ 10-12 _____ |
| 14 |                               |     |                                                                                                                                                                                                                                                                                     |                   |
| 15 |                               |     |                                                                                                                                                                                                                                                                                     |                   |
| 16 | Ancillary and post-trial care | 30  | Provisions, if any, for ancillary and post-trial care, and for compensation to those who suffer harm from trial participation                                                                                                                                                       | _____ NA _____    |
| 17 |                               |     |                                                                                                                                                                                                                                                                                     |                   |
| 18 |                               |     |                                                                                                                                                                                                                                                                                     |                   |
| 19 |                               |     |                                                                                                                                                                                                                                                                                     |                   |
| 20 | Dissemination policy          | 31a | Plans for investigators and sponsor to communicate trial results to participants, healthcare professionals, the public, and other relevant groups (eg, via publication, reporting in results databases, or other data sharing arrangements), including any publication restrictions | _____ 11 _____    |
| 21 |                               |     |                                                                                                                                                                                                                                                                                     |                   |
| 22 |                               |     |                                                                                                                                                                                                                                                                                     |                   |
| 23 |                               |     |                                                                                                                                                                                                                                                                                     |                   |
| 24 |                               | 31b | Authorship eligibility guidelines and any intended use of professional writers                                                                                                                                                                                                      | _____ NA _____    |
| 25 |                               |     |                                                                                                                                                                                                                                                                                     |                   |
| 26 |                               | 31c | Plans, if any, for granting public access to the full protocol, participant-level dataset, and statistical code                                                                                                                                                                     | _____ NA _____    |
| 27 |                               |     |                                                                                                                                                                                                                                                                                     |                   |
| 28 |                               |     |                                                                                                                                                                                                                                                                                     |                   |
| 29 | <b>Appendices</b>             |     |                                                                                                                                                                                                                                                                                     |                   |
| 30 |                               |     |                                                                                                                                                                                                                                                                                     |                   |
| 31 | Informed consent materials    | 32  | Model consent form and other related documentation given to participants and authorised surrogates                                                                                                                                                                                  | _____ 7-9 _____   |
| 32 |                               |     |                                                                                                                                                                                                                                                                                     |                   |
| 33 |                               |     |                                                                                                                                                                                                                                                                                     |                   |
| 34 | Biological specimens          | 33  | Plans for collection, laboratory evaluation, and storage of biological specimens for genetic or molecular analysis in the current trial and for future use in ancillary studies, if applicable                                                                                      | _____ 9 _____     |
| 35 |                               |     |                                                                                                                                                                                                                                                                                     |                   |
| 36 |                               |     |                                                                                                                                                                                                                                                                                     |                   |

\*It is strongly recommended that this checklist be read in conjunction with the SPIRIT 2013 Explanation & Elaboration for important clarification on the items. Amendments to the protocol should be tracked and dated. The SPIRIT checklist is copyrighted by the SPIRIT Group under the Creative Commons [“Attribution-NonCommercial-NoDerivs 3.0 Unported”](https://creativecommons.org/licenses/by-nc-nd/3.0/) license.

# BMJ Open

## Study protocol of the Edinburgh and Lothian Virus Intervention Study in Kids: A randomised controlled trial of hypertonic saline nose drops in children with upper respiratory tract infections (ELVIS Kids)

|                                 |                                                                                                                                                                                                                                                                                                                                                                                                                                                                                                                                                                                                                                                                                                                                                                                    |
|---------------------------------|------------------------------------------------------------------------------------------------------------------------------------------------------------------------------------------------------------------------------------------------------------------------------------------------------------------------------------------------------------------------------------------------------------------------------------------------------------------------------------------------------------------------------------------------------------------------------------------------------------------------------------------------------------------------------------------------------------------------------------------------------------------------------------|
| Journal:                        | <i>BMJ Open</i>                                                                                                                                                                                                                                                                                                                                                                                                                                                                                                                                                                                                                                                                                                                                                                    |
| Manuscript ID                   | bmjopen-2021-049964.R1                                                                                                                                                                                                                                                                                                                                                                                                                                                                                                                                                                                                                                                                                                                                                             |
| Article Type:                   | Protocol                                                                                                                                                                                                                                                                                                                                                                                                                                                                                                                                                                                                                                                                                                                                                                           |
| Date Submitted by the Author:   | 02-Mar-2021                                                                                                                                                                                                                                                                                                                                                                                                                                                                                                                                                                                                                                                                                                                                                                        |
| Complete List of Authors:       | Ramalingam, Sandeep ; Royal Infirmary of Edinburgh, Department of Laboratory Medicine<br>Graham, Catriona; The University of Edinburgh, Edinburgh Clinical Research Facility<br>Oatey, Katherine; The University of Edinburgh Usher Institute of Population Health Sciences and Informatics<br>Rayson, Phillip; The University of Edinburgh, Edinburgh Clinical Trials Unit<br>Stoddart, Andrew; The University of Edinburgh Usher Institute of Population Health Sciences and Informatics, Edinburgh Health Services Research Unit<br>Sheikh, Aziz; The University of Edinburgh Usher Institute of Population Health Sciences and Informatics, Division of Community Health Sciences<br>Cunningham, Steven; Royal Hospital for Sick Children, Department of Child Life and Health |
| <b>Primary Subject Heading</b>: | Paediatrics                                                                                                                                                                                                                                                                                                                                                                                                                                                                                                                                                                                                                                                                                                                                                                        |
| Secondary Subject Heading:      | Infectious diseases, Global health, Public health, Research methods                                                                                                                                                                                                                                                                                                                                                                                                                                                                                                                                                                                                                                                                                                                |
| Keywords:                       | Paediatric infectious disease & immunisation < PAEDIATRICALS, VIROLOGY, PRIMARY CARE, Community child health < PAEDIATRICALS, NEONATOLOGY                                                                                                                                                                                                                                                                                                                                                                                                                                                                                                                                                                                                                                          |
|                                 |                                                                                                                                                                                                                                                                                                                                                                                                                                                                                                                                                                                                                                                                                                                                                                                    |

SCHOLARONE™  
Manuscripts



I, the Submitting Author has the right to grant and does grant on behalf of all authors of the Work (as defined in the below author licence), an exclusive licence and/or a non-exclusive licence for contributions from authors who are: i) UK Crown employees; ii) where BMJ has agreed a CC-BY licence shall apply, and/or iii) in accordance with the terms applicable for US Federal Government officers or employees acting as part of their official duties; on a worldwide, perpetual, irrevocable, royalty-free basis to BMJ Publishing Group Ltd ("BMJ") its licensees and where the relevant Journal is co-owned by BMJ to the co-owners of the Journal, to publish the Work in this journal and any other BMJ products and to exploit all rights, as set out in our [licence](#).

The Submitting Author accepts and understands that any supply made under these terms is made by BMJ to the Submitting Author unless you are acting as an employee on behalf of your employer or a postgraduate student of an affiliated institution which is paying any applicable article publishing charge ("APC") for Open Access articles. Where the Submitting Author wishes to make the Work available on an Open Access basis (and intends to pay the relevant APC), the terms of reuse of such Open Access shall be governed by a Creative Commons licence – details of these licences and which [Creative Commons](#) licence will apply to this Work are set out in our licence referred to above.

Other than as permitted in any relevant BMJ Author's Self Archiving Policies, I confirm this Work has not been accepted for publication elsewhere, is not being considered for publication elsewhere and does not duplicate material already published. I confirm all authors consent to publication of this Work and authorise the granting of this licence.

1  
2 **Study protocol of the Edinburgh and Lothian Virus Intervention Study in Kids: A**  
3 **randomised controlled trial of hypertonic saline nose drops in children with upper**  
4 **respiratory tract infections (ELVIS Kids)**  
5

6  
7 Sandeep Ramalingam<sup>1</sup>, Catriona Graham<sup>2</sup>, Katherine Oatey<sup>3</sup>, Phillip Rayson<sup>3</sup>, Andrew  
8 Stoddart<sup>3</sup>, Aziz Sheikh<sup>4</sup>, Steve Cunningham<sup>5</sup> on behalf of the ELVIS Kids Trial  
9 Investigators  
10  
11

12  
13  
14 1. Department of Laboratory Medicine, Royal Infirmary of Edinburgh, 51 Little France Crescent,  
15 Edinburgh, EH16 4SA.

16  
17 2. Edinburgh Clinical Research Facility, University of Edinburgh, Western General Hospital,  
18 Crewe Road South, Edinburgh, EH4 2XU, UK.

19  
20 3. Edinburgh Clinical Trials Unit, Usher Institute, Level 2, BioQuarter 9, 9 Little France Road  
21 Edinburgh, EH16 4UX  
22

23  
24 4. Centre of Medical Informatics, Usher Institute, The University of Edinburgh, Medical School  
25 Doorway 3, Teviot Place, Edinburgh, EH8 9AG, UK.

26  
27 5. Centre for Inflammation Research, Department of Child Life and Health, Royal Hospital for  
28 Sick Children; 9 Sciennes Road; Edinburgh EH9 1LF  
29  
30  
31  
32  
33  
34

35 **Correspondence:**

36 Dr. Sandeep Ramalingam

37 Consultant Virologist

38 Royal Infirmary of Edinburgh

39 51 Little France Crescent

40 Edinburgh EH16 4SA

41 sandeep.ramalingam@nhslothian.scot.nhs.uk  
42  
43  
44  
45  
46  
47  
48

49 Keywords: Upper respiratory tract infection, common cold, children, hypertonic saline, nose  
50 drops, rhinovirus, coronavirus, influenza, respiratory syncytial virus, metapneumovirus,  
51 adenovirus, parainfluenza virus, enterovirus.  
52  
53  
54

55 Word Count: 4462  
56  
57  
58  
59  
60

## Abstract

**Introduction:** ELVIS Kids is a parallel, open-label, randomised controlled trial (RCT) of hypertonic saline (HS) nose drops (~2.6% sodium chloride; NaCl) vs. standard care in children <7 years of age with symptoms of an upper respiratory tract infection (URTI).

**Methods and analysis:** Children are recruited prior to URTI or within 48 hours of developing URTI symptoms by advertising in areas such as local schools/nurseries, health centres/hospitals, recreational facilities, public events, workplaces, local/social media. Willing parents/guardians, of children <7 years of age will be asked to contact the research team at their local site. Children will be randomised to either a control arm (standard symptomatic care), or intervention arm (3 drops/nostril of HS, at least 4 times a day, until 24 hours after asymptomatic or a maximum of 28 days). All participants are requested to provide a nasal swab at the start of the study (intervention arm: before HS drops) and then daily for 4 more days. Parent/guardian complete a validated daily diary, an end of illness diary, a satisfaction questionnaire, and a wheeze questionnaire (day 28). The parent/guardian of a child in the intervention arm is taught to prepare HS nose drops. Parent/guardian of children asymptomatic at recruitment are requested to inform the research team within 48 hours of their child developing an URTI and follow the instructions already provided. The day 28 questionnaire determines if the child experienced a wheeze following illness. Participation in the study ends on day 28.

**Ethics and dissemination:** The study has been approved by the West of Scotland Research Ethics Service (REC) (18/WS/0080). It is co-sponsored by Academic and Clinical Central Office for Research and Development (ACCORD) - a partnership between the University of Edinburgh and NHS Lothian Health Board. The findings will be disseminated through peer-reviewed publications, conference presentations and via the study website.

**Trial registration number:** Clinicaltrials.gov: NCT03463694

### Strengths and limitations of this study

- Open label community-based randomised controlled study investigating the effectiveness of HS vs standard treatment in children under 7 years of age with a common cold
- Parents in the intervention arm are taught to safely make HS at home
- Nose swabs are collected to identify the virus(es) and to measure change in viral shedding
- A validated symptom score diary (CARIFS) is used as part of the daily diary
- There is no placebo arm

## Introduction:

Viral upper respiratory tract infections (URTI) are very common in childhood resulting in a significant burden on the population and health services<sup>1</sup>. The annual incidence rate of URTI in childhood can vary between 6-12 episodes<sup>2 3</sup>. Children have a longer duration of illness (mean 1.8 weeks; standard deviation: 1.3 weeks) compared to adults<sup>3 4</sup>. In Scotland, URTI is the leading cause of general practitioner (GP) visits in children <5 years (n=84710, 574/1000 population) and the fourth most common cause of consultation in children aged 5-14 (n=33790, 116.5/1000 population)<sup>5</sup>. In secondary care, in 2015-16, 13.3% (n=16,644) and 19.7% (14,600) of all admissions/emergency admissions respectively in children were due to upper/lower respiratory tract infections<sup>6</sup>. 12-14% of children who develop an URTI will go on to develop lower respiratory tract disease (viral induced wheeze: 80/1000<sup>7</sup>, bronchiolitis: 46/1000<sup>8</sup>, and pneumonia: 0.27 episodes/child year<sup>9</sup>). Hence interventions that reduce URTI severity may considerably benefit patients/carers and reduce pressure on the NHS. Since >200 viruses<sup>10</sup> can cause an URTI, individually targeted antiviral therapy is impractical and measures that work against all viruses are required.

New data suggest that hypertonic saline (HS) may be able to suppress viral replication, regardless of viral type and hence be a potential respiratory antiviral agent with clinical application. Saline irrigation is commonly used in clinical practice, mostly to deliver a mucolytic effect. However, we have recently identified that human epithelial (cervical-HeLa, respiratory-A549) cells utilise NaCl to mount a broad-spectrum antiviral effect against representative DNA, RNA enveloped and non-enveloped viruses<sup>11</sup>. The antiviral effect is dependent on the entry of chloride ions into the cell and the production of intracellular hypochlorous acid (HOCl)<sup>11</sup>. HOCl is the active ingredient of bleach, which can inactivate most viruses<sup>12-15</sup>. A polymorphism causing reduction in HOCl production has been reported in individuals with cervical cancer<sup>16</sup>. Since cervical cancer follows infection with high-risk types of human papilloma viruses, it suggests a key role for local antiviral mechanisms. HOCl production is an important anti-bacterial mechanism in human neutrophils<sup>17</sup>. Increased HOCl production is reported within gut epithelial cell of fruit flies after bacterial lysate ingestion<sup>18</sup>. These data suggest an anti-infective role of HOCl and its precursor NaCl in epithelial cells.

In addition, it has recently been shown that accumulation of Na<sup>+</sup> ions in human skin helps fight bacterial/parasitic infections<sup>19 20</sup>. A high salt diet increased Na<sup>+</sup> in skin leading to a hypertonic environment, increased Nitric Oxide (NO) production in macrophages and thereby pathogen removal<sup>19 20</sup>. Whilst our laboratory data point to the importance of Cl<sup>-</sup> in combating viral infections, Jantsch et al have shown the importance of Na<sup>+</sup> in fighting bacterial infections. Taken together, these data suggest that innate immunity may be dependent on NaCl in epithelial cells helping to clear bacterial and viral infection.

Nebulised HS has been used to treat bronchiolitis; an acute viral infection of young children caused by a variety of respiratory viruses. Meta-analyses of current trials suggest a possible reduction in length of hospital stay<sup>21 22</sup>, but the association is weak and there have been concerns about the replicability of this finding<sup>23-27</sup> potentially as HS has been given at the peak of disease when viral load is maximum and lower respiratory tract disease (with potential

dysregulated immune response) is established. More positive signals have been demonstrated when HS has been administered in accident and emergency department contexts to reduce hospital admission rates: data remain conflicting and a systematic review has been started to analyse data as they emerge<sup>26-28</sup>.

The role of saline (isotonic or hypertonic) in children with viral URTI has been explored in two published studies. In children aged 6-10 years administered isotonic saline as a spray (6 times/day) there was a significant reduction in reported sore throat, nasal secretions, and use of nasal decongestants/mucolytic (vs. standard care, no placebo)<sup>29</sup>. In children <2 years treated with saline/sea water drops (thrice a day for 5 days) there was a significant reduction in URTI symptoms reported when compared to untreated children<sup>30</sup>. However, a Cochrane review concluded that no definitive conclusions could be drawn as the available studies were small and had major methodological limitations: baseline symptom score was calculated over 7 days (not at the point of entry) and groups had different characteristics at baseline<sup>31</sup>.

We recently completed the Edinburgh and Lothians' Viral Intervention Study (ELVIS), an open label pilot randomised controlled trial (RCT) of hypertonic saline nasal irrigation and gargling (HSNIG) in 66 adults with an URTI ([www.elvisstudy.com](http://www.elvisstudy.com))<sup>4</sup>. Most participants were infected with rhinoviruses/coronaviruses. The intervention arm had a 22% reduction in duration of illness (mean (SD) of intervention arm: 6.8 days (2.2) and control arm 8.7 days (3.3), difference of 1.9 days;  $p=0.01$ ). 93% believed HSNIG helped improve symptoms of the cold. There was 36% reduction in over-the-counter medication use ( $p=0.003$ ), transmission within household was reduced by 35% ( $p=0.006$ ), and viral shedding reduced at a faster rate of  $\geq 0.5 \log_{10}/\text{day}$  in those receiving HSNIG ( $p=0.04$ )<sup>4</sup>. The reduction in viral shedding and transmission within household were supportive of our laboratory data and consistent with a direct cellular antiviral action by NaCl.

Given the laboratory evidence supported by our demonstration of clinical benefits in adults an RCT in children with URTI to study the effects of HS on duration of illness and viral shedding is now needed. No suitable placebo is available: Sodium bicarbonate and plain water cause discomfort when administered to nasal mucosa and normal saline, a commonly used, safe, placebo contains NaCl and so may not act as a placebo. For these reasons, the study will not be placebo controlled.

## **Methods and analysis:**

### **Study objectives**

#### **Primary objective:**

To investigate whether the use of parent/guardian-initiated HS nose drops administered to children with symptoms consistent with acute viral URTI reduces the duration of symptoms when compared to children managed using standard care.

#### **Secondary objectives:**

To determine the effect of HS nose drops on:

1. Severity of all symptoms



2. Duration and severity of individual symptoms
3. Contact with NHS 24, out of hours primary care (OOH), and primary care (GP)
4. Hospital attendance (i.e. A&E attendance and/or hospital admission) and diagnosis
5. Reduction in wheeze
6. Over the counter medication use
7. Duration, reduction or rate of reduction in viral shedding
8. Transmission within the household
9. Side effects associated with the use of saline nose drops
10. Adverse events associated with the use of saline nose drops
11. Time off from school/nursery for child and workdays lost for parent/guardian
12. Cost associated with illness (over the counter medication costs and NHS costs)

### **Study design and sample size:**

ELVIS Kids is a parallel, open label, RCT of HS nose drops (~2.6% NaCl) vs. standard care in children <7 years of age with symptoms of an URTI. The aim is to recruit a total of 480 children (240/arm).

The study will run over ~42 months at participating sites in Scotland (sites are as listed on [clinicaltrials.gov](http://clinicaltrials.gov)). Children are recruited prior to, or within 48 hours of developing URTI symptoms by advertising in areas such as local schools, nurseries, health centres, hospitals, recreational facilities, workplaces public events and the community as well as local and social media. For the purposes of this study an URTI is defined as: at least two respiratory symptoms (nasal congestion, runny nose, cough, sore throat) OR one respiratory symptoms and at least one systemic symptom (low energy/tired, muscle aches/pains, headache, fever  $\geq 38^{\circ}\text{C}$ ). Willing parents/guardians, will be directed by the study advertising to contact the research team at their local site) if they are interested in participating.

Children will be randomised to either a control arm of standard symptomatic care, or an intervention arm of 3 drops each nostril of HS at least 4 times a day and up to a maximum of 12 times a day until asymptomatic or maximum of 28 days. All parents/guardians will be requested to obtain a mid-turbinate nasal swab from the participant first thing in the morning (before nose drops in the intervention arm) for five for 5 consecutive days (unless the child is well before then), a daily diary (a global severity question, CARIFS<sup>32</sup>, a validated illness measure in the UK, side effects and compliance with trial procedures) until they report the child as "not unwell", an end of illness diary (infection in household contacts, ease of use and acceptability of intervention, medication and healthcare use, acceptability, time taken off usual activities, wheezing and whistling in the chest), a satisfaction questionnaire and adverse events. Parents/guardians of the children allocated to the intervention arm will be taught how to prepare the HS (including sterilization instructions for children under a year). Parents/guardians of children who are asymptomatic at recruitment are requested to inform their local research team when the child

1  
2 develops an URTI (within 48 hours) and follow the instructions already provided to them. On day  
3 28, parents/guardians will be contacted to determine if their child suffered from wheezing or  
4 whistling in the chest either during the illness or at any point until day 28. Participation in the  
5 study will end on day 28.  
6  
7

### 8 9 **Eligibility and consent:**

10 Pre-screening for eligibility to participate will be completed by a member of the research team  
11 at the clinical trials unit when parents/guardians phone to express interest in the study. If  
12 parents/guardians attend an appointment and take part in the study, the study number will be  
13 recorded on the screening log and details of eligibility will be recorded in the study database.  
14  
15

### 16 17 **Inclusion criteria:**

- 18 1. Children between corrected gestational age of  $\geq 40$  weeks and  $< 7$  years of age
- 19 2. Children without URTI OR  $\leq 48$  hours of URTI\* starting.

20  
21  
22 \*A URTI being defined as at least two respiratory symptoms (nasal congestion (i.e. stuffy nose),  
23 runny nose, cough, sore throat) OR one respiratory symptom + at least one systemic symptom  
24 (Low energy/tired, muscle aches/pains, headache, fever  $38^{\circ}\text{C}$ ).  
25  
26

### 27 28 29 **Exclusion criteria:**

- 30 1. Children needing immediate medical attention
- 31 2. Children using saline drops/sprays at the time of randomisation
- 32 3. Children on immunosuppressive medication, regular oral/inhaled steroids, regular  
33 antibiotics (use of antibiotics is allowed as long as the child does not need regular  
34 antibiotics)
- 35 4. Children with a known chronic illness (e.g. cystic fibrosis, cardiac, renal, liver, lung,  
36 neurological conditions) apart from wheeze or asthma which are not exclusions if the  
37 child is otherwise well and not on regular steroids)
- 38 5. Children being followed up for developmental delay
- 39 6. Children receiving the nasal flu vaccine  $\leq 14$  days ago
- 40 7. Children taking part in another interventional trial
- 41 8. If parents/guardians indicating that they are unable to comply with the study protocol  
42 prior to randomisation
- 43 9. If parents/guardians are unable to understand written or spoken English
- 44 10. Children randomised to ELVIS KIDS on a previous episode of URTI
- 45 11. Children with a concurrently participating sibling

46  
47 All ineligible and non-recruited participants will be recorded on the ELVIS Kids screening log  
48 with a reason given.  
49  
50  
51  
52  
53  
54  
55  
56  
57  
58  
59  
60

**Obtaining consent:**

Only trained and delegated members of the trial team will take consent – this will usually be the research nurse. The participant information sheet (PIS), which will explain the aims of the study and the potential risks and benefits of the study treatment, are provided to parents/guardians when they meet the research team (also available online). A children's PIS will be available to discuss with older children attending the appointment with the option of giving their assent. (Supplement)

If the parent/guardian wishes to participate in the study, then they will be asked to sign the Informed Consent Form (ICF) (Supplement). Both the parent/guardian and the person delegated to take consent will sign and personally date the ICF. The original signed ICF must be kept by the Investigator in the investigator site file, 1 copy is provided to the parent/guardian, 1 copy is placed in TRAK. The same would apply in the case of assent being given.

**Randomisation and treatment allocation:**

A member of the research team from the clinical research facility will perform the randomisation using a web-based randomisation service managed by the Edinburgh Clinical Trials Unit (ECTU). Children will be allocated to receive either HS nose drops or standard care in a 1:1 ratio using minimisation based on age (0-2, >2 year) and sex and allocated to receive the treatment which minimises the imbalance with a probability 0.8. The study is not blinded apart from those carrying out lab assessments of nasal swabs.

Sea salt will be provided by Cornish Sea Salt company in 225g pots. They will be supplied to local pharmacies where they will be labelled and stored. A working stock will be issued to the research team. If a child is allocated to an intervention arm, the parent/guardian will be given instructions on the preparation and use of HS nose drops using instructional video, verbal and written information. Parents/guardians will be asked to add 1 level measure of sea salt to a fixed volume of freshly boiled water using the measuring spoon and clean glass jar provided. This provides a NaCl concentration of ~2.6% and the drops can be used once cooled. Two glass jars are provided so that the parent / guardian could use one and have a clean spare to prepare solution the next day. Two dropper bottles are provided with which nose drops can be applied (one in use, and a clean spare).

**Withdrawal of study participants:**

Parents/guardians are free to withdraw their child from the study at any point. If withdrawal occurs, the primary reason for withdrawal will be documented in the participant's case report form, if given. All data and swabs collected before withdrawal will be retained for analysis in cases where participants withdraw.

**Study assessments:**

1  
2 The protocol is designed in accordance with the standard protocol items: recommendations for  
3 interventional trials (SPIRIT). The trial overview of the study assessments is available as a  
4 SPIRIT figure (Table 1). At the appointment, a member of the research team will train the  
5 parent/guardian how to identify a URTI, how to measure temperature, how to complete the  
6 diaries and how to collect and return the mid-turbinate swabs. In addition, those in the  
7 intervention arm will be given instructions on how to prepare and apply nose drops. Baseline  
8 information on the child, contact details of parent / guardian and number of household members  
9 at the time of recruitment will be collected in the electronic case report form (eCRF). If recruited  
10 when symptomatic, parents will be instructed to start the study assessments the same day. If  
11 recruited when asymptomatic, and there are no changes to the child's medical information,  
12 parent/guardians will be asked to start the study assessments and to inform the study team the  
13 same day if possible or at least within 2 days of onset of illness. If recruited when asymptomatic,  
14 and there are changes to the child's medical information, parent/guardians will be asked to  
15 contact the study team to ensure the child still meets the eligibility criteria before starting the  
16 study procedures. If it is not suitable for the child to take part during this URTI (e.g. received  
17 the flu vaccine in the past 2 weeks) they will remain on study and be asked to contact the team  
18 at the onset of the next URTI.

19  
20  
21  
22  
23  
24  
25  
26  
27  
28 Parents/guardians are requested to collect a nasal (mid-turbinate) swab as soon as possible  
29 on day 1 and first thing in the morning (and prior to HS nose drops being applied) on days 2-5  
30 if children remain unwell. These samples are to be packed in the transport box provided, stored  
31 in the fridge and returned in the pre-paid envelope or as soon as possible after completing  
32 collection. If samples are not received by day 10, a reminder will be sent to the parent/guardian.

33  
34  
35  
36  
37  
38  
39  
40  
41  
42  
43  
44  
45  
46  
47  
48  
49  
50  
51  
52  
53  
54  
55  
56  
57  
58  
59  
60  
Parents/guardians will complete a daily diary (Supplement) which records any symptoms the  
child is experiencing, compliance to nasal swabs and HS drops, any side effects and use of  
healthcare services. Parents will be taught how to measure temperature with TempaDot.  
Parents are advised to measure the temperature only if they think the child has a fever. If the  
child has an axillary temperature of  $\geq 38^{\circ}\text{C}$ , it should be recorded as a fever in the daily diary.  
The diaries will be provided as an online form (unless parents cannot access this in which case  
a paper copy can be provided). If the online Daily Diary is not completed a reminder will be  
sent.

An end of illness diary (Supplement) and satisfaction questionnaire (Supplement) will be  
completed by the parent/guardian once the child is asymptomatic for >24hours or after a  
maximum of 28 days. On day 28, the parent/guardian will be contacted by email and sent a text  
message to ask if their child has experienced any wheeze since the end of illness diary was  
completed (Supplement).

Participants will be sent a £30 voucher by email as compensation for any inconvenience once  
they have returned the study data.

**Analysis and storage of samples:**

Up to five nasal swabs will be collected and posted to the Department of Laboratory Medicine, Royal Infirmary of Edinburgh, 51 Little France Crescent, Edinburgh, EH16 4SA, where they will be stored and processed. Day 1 samples will be analysed by the respiratory panel and the cycle threshold (CT) of positive samples recorded. If the day one sample is missing, the first available sample will be tested to identify the virus. If an agent is identified, all samples (days 1-5) will be tested in parallel to estimate change in viral shedding and the CT recorded. If a sample is positive on day 1 and negative on subsequent days, they may be tested for human DNA to confirm a sample was collected. Log conversion of each positive result will be done using the following formula:  $(40-CT \text{ of specimen})/3.3$  to estimate change in shedding. All nucleic acid extracts and remaining original samples will be stored in the Lothian NHS research Scotland BioResource biobank (REC reference 15/ES/0094) in future ethically approved studies.

**Outcomes / endpoints:**Primary endpoint:

Duration of illness (measured as the number of days until the parent reports the child to be well)

Secondary endpoints:

1. Severity of all symptoms as measured by CARIFS
2. The length of time for individual symptoms to resolve
3. Severity of individual symptoms
4. Contacting healthcare (NHS 24, OOH, GP) (Number of participants and frequency of contacts)
5. Participants needing GP appointments (Number of participants and frequency of contacts)
6. Participants attending hospital and diagnosis (Number of participants and frequency of contacts)
7. Length of stay in hospital if admitted
8. Number of participants reporting wheeze during illness and between end of illness to 28 days.
9. Number of participants reporting over the counter medication use
10. Duration of viral shedding
11. Reduction in viral shedding
12. Rate of reduction in viral shedding
13. Reduction in transmission to household contacts
14. Number of participants reporting side effects associated with nasal drops
15. Number of participants reporting adverse events associated with nasal drops
16. Types and severity of side effects/adverse events reported
17. Number of days lost from school/nursery for child
18. Number of days lost from work for parent/guardian
19. Cost of over the counter medication used

## 20. NHS costs associated with illness

### **Participant timeline:**

The participant pathways can be seen in figure 1 and figure 2. Participants will be active in the study for 28 days. There are no long term follow up assessments after day 28 of URTI developing.

### **Data collection:**

Baseline data will be collected on the baseline electronic CRF (eCRF) by a member of the research team. Parents/guardians will record study data onto either an online form which will be saved into the eCRF. A paper CRF (pCRF) option is available if a parent/guardian prefers it. pCRF will be returned to the local research team and transcribed by a member of the research team into the database and cross-checked by another.

Virological results are downloaded (identifiable by study number) on a weekly basis on to a specific drive by the Laboratory Information Management & Technology team. These will be emailed to the ECTU on a monthly basis and uploaded into the study database.

The trial database will be created and maintained by ECTU. Trained and delegated members of the research team will be given password-protected logins to the database to complete data entry. Data completed online by parents/guardians will be transmitted into the study database. The data will be stored in a secure server in the University of Edinburgh for at least the archiving period.

### **Adverse events:**

Symptoms and side effects from the Daily Diary will be recorded in the CRF but will not be recorded as an adverse event (AE) or adverse reaction. Hospitalisation is a study outcome and is exempt from reporting to the Sponsor as a serious adverse event.

Any other adverse events identified between Day 1 and Day 28 of the study will be recorded. Any events reaching seriousness criteria will be reported to the sponsor within 24 hours.

### **Sample size calculation and statistical analysis:**

Sample size calculation is based on mean (SD) duration of illness values in a control population from Gruber et al of 13 (9) days. To detect a 20% difference in mean duration, i.e. 3 days, using a two-sided, two-sample test with 5% level of significance, 90% power and common standard deviation of 9 days we will need a sample of 191 per treatment arm, without drop-outs. Hence, we will recruit 240 participants per arm to allow for up to 20% drop-outs.

Statistical analysis will be conducted according to, and full of the details will be specified in, the pre-specified Statistical Analysis Plan (SAP). Differences in illness duration between treatment arms will be compared using a two-sample t-test or non-parametric equivalent, as appropriate. This method will also be employed to examine differences between treatment arms for other continuous outcome measures such as average symptom score, viral shedding between

1  
2 treatment arms. For binary categorical data, for example the proportion of participants per arm  
3 attending their GP, attending hospital, etc we will compare the treatment arms using a binomial  
4 test for the comparison of proportions. Where we have categorical data with more than 2  
5 categories a Chi-squared test will be used to examine the relationships between treatment  
6 arms. If the number of cases of individual viruses are sufficient, the above analysis will be  
7 repeated by virus type.  
8  
9

#### 10 11 12 **Oversight arrangements:**

13 The study is co-sponsored by ACCORD, a partnership between the University of Edinburgh  
14 and NHS Lothian Health Board based at QMRI, 47 Little France Crescent, Edinburgh Email:  
15 enquiries@accord.scot. The trial will be coordinated by a Project Management Group (PMG),  
16 consisting of the Chief Investigator, Co-investigators, Trial Manager, Statistician and  
17 Coordinating Nurse. The Trial Manager will oversee the study and will be accountable to the  
18 Chief Investigator. ECTU is responsible for trial management and oversight of data collection.  
19 The Edinburgh Clinical Research Facility are responsible for the statistical analysis. A  
20 Delegation Log will be prepared, detailing the responsibilities of each member of staff working  
21 on the trial. A Trial Steering Committee (TSC) has been established to oversee the conduct  
22 progress. As there will be no Data Monitoring Committee for this project, the TSC will review  
23 safety information as part of their remit.  
24  
25  
26  
27  
28  
29

#### 30 31 **Ethics and dissemination:**

32 The study will be conducted in accordance with the principles of the International Conference  
33 on Harmonisation Tripartite Guideline for Good Clinical Practice (ICH GCP). The study has been  
34 approved by the West of Scotland Research Ethics Service (reference: 18/WS/0080) and  
35 registered on Clinicaltrials.gov (NCT03463694). Any changes in research activity, except those  
36 necessary to remove an apparent, immediate hazard to the participant in the case of an urgent  
37 safety measure, will be reviewed and approved by the Chief Investigator. Amendments will be  
38 submitted to the sponsor for review and authorisation before being submitted in writing to the  
39 appropriate REC, and local R&D for approval prior to participants being enrolled into an  
40 amended protocol. The findings will be disseminated through peer-reviewed publications,  
41 conference presentations and on the study website.  
42  
43  
44  
45  
46  
47

#### 48 49 **Confidentiality:**

50 All laboratory specimens, evaluation forms, reports, and other records must be identified in a  
51 manner designed to maintain participant confidentiality. All records must be kept in a secure  
52 storage area with limited access. Clinical information will not be released without the written  
53 permission of the participant's parent/guardian. The Investigator and study site staff involved  
54 with this study may not disclose or use for any purpose other than performance of the study,  
55 any data, record, or other unpublished, confidential information disclosed to those individuals for  
56 the purpose of the study. Prior written agreement from the sponsor or its designee must be  
57 obtained for the disclosure of any said confidential information to other parties.  
58  
59  
60

1  
2 All Investigators and study site staff involved with this study must comply with the requirements  
3 of General Data Protection Regulations with regard to the collection, storage, processing and  
4 disclosure of personal information and will uphold the Act's core principles. Access to collated  
5 participant data will be restricted to individuals from the research team treating the participants,  
6 representatives of the sponsor(s) and representatives of regulatory authorities. Computers used  
7 to collate the data will have limited access measures via user names and passwords. Published  
8 results will not contain any personal data that could allow identification of individual participants.  
9  
10  
11  
12

13  
14 **Patient and Public involvement (PPI):** Feedback was obtained from PPI representatives on  
15 the study protocol, information sheets, diaries and consent forms and necessary modifications  
16 made prior to starting the study. A PPI representative is also invited to attend the trial steering  
17 committee meetings.  
18  
19

20  
21 **Access to data:**

22 Ownership of the data arising from this study resides with the study team. On completion of the  
23 study, the study data will be analysed and tabulated, and a clinical study report will be prepared  
24 in accordance with ICH guidelines.  
25  
26  
27

28 **Trial status:**

29 This paper describes study protocol version V4 (06/01/2020). The trial opened on 02 November  
30 2018. The first participant was recruited on 6<sup>th</sup> November 2018. The planned study end date is  
31 30 November 2021. At the time of submission, study recruitment was suspended due to the  
32 COVID-19 pandemic.  
33  
34  
35

36 **Discussion:**

37 The study is based on the recently discovered evidence that epithelial cells have an innate  
38 antiviral effect <sup>11</sup>. This effect can be augmented by supplying the cells with chloride ion through  
39 NaCl. Saline, commonly used as a placebo cannot be used in that role here as it contains NaCl  
40 – the substrate being tested. We are hence measuring viral shedding as an independent  
41 measure of any antiviral effect. The results from this trial will help determine if a simple and low-  
42 cost intervention could help reduce the duration of symptoms of URTI in children. Changes to  
43 the duration of individual symptoms, wheeze, transmission within the household, over-the-  
44 counter medication use, need for further treatment, days lost and cost of illness are all  
45 secondary outcomes.  
46  
47  
48  
49  
50

51 **Conclusion:**

52 Since numerous viruses can cause URTI and in the absence of an antiviral agent/vaccine  
53 against the vast majority of viruses, if successful, this low cost and easily accessible  
54 intervention can easily be rolled out globally.  
55  
56  
57  
58  
59  
60



## References:

1. Toivonen L, Schuez-Havupalo L, Karppinen S, et al. Rhinovirus Infections in the First 2 Years of Life. *Pediatrics* 2016;138(3) doi: 10.1542/peds.2016-1309
2. Tarafder MR, Carabin H, Gyorkos TW, et al. Diarrhea and colds in child day care centers: impact of various numerator and denominator definitions of illness episodes. *Epidemiology* 2009;20(6):796-9. doi: 10.1097/EDE.0b013e3181ba468e
3. Gruber C, Keil T, Kulig M, et al. History of respiratory infections in the first 12 yr among children from a birth cohort. *Pediatr Allergy Immunol* 2008;19(6):505-12. doi: 10.1111/j.1399-3038.2007.00688.x
4. Ramalingam S, Graham C, Dove J, et al. A pilot, open labelled, randomised controlled trial of hypertonic saline nasal irrigation and gargling for the common cold. *Sci Rep* 2019;9(1):1015. doi: 10.1038/s41598-018-37703-3
5. Scotland I. How often do people in Scotland consult their GP practice and why? Reasons for consulting the GP practice: Top 10 most common conditions seen. (2012/2013 29/10/2013 2013) [Available from: <http://www.isdscotland.org/Health-Topics/General-Practice/GP-Consultations/> accessed 08/02/2016 2016.
6. Scotland I. Annual Acute Hospital Activity and NHS Beds Information in Scotland - Year ending 31 March 2016 [Available from: <https://www.isdscotland.org/Health-Topics/Hospital-Care/Publications/data-tables.asp?id=8582016>.
7. Schuez-Havupalo L, Karppinen S, Toivonen L, et al. Association between infant swimming and rhinovirus-induced wheezing. *Acta Paediatr* 2014;103(11):1153-8. doi: 10.1111/apa.12736
8. Green CA, Yeates D, Goldacre A, et al. Admission to hospital for bronchiolitis in England: trends over five decades, geographical variation and association with perinatal characteristics and subsequent asthma. *Arch Dis Child* 2016;101(2):140-6. doi: 10.1136/archdischild-2015-308723
9. le Roux DM, Myer L, Nicol MP, et al. Incidence and severity of childhood pneumonia in the first year of life in a South African birth cohort: the Drakenstein Child Health Study. *Lancet Glob Health* 2015;3(2):e95-e103. doi: 10.1016/S2214-109X(14)70360-2
10. Common Cold: Centre for Disease Control; [updated 06/02/2020. accessed 01/06/2020 2020.
11. Ramalingam S, Cai B, Wong J, et al. Antiviral innate immune response in non-myeloid cells is augmented by chloride ions via an increase in intracellular hypochlorous acid levels. *Sci Rep* 2018;8(1):13630. doi: 10.1038/s41598-018-31936-y
12. Kim HJ, Lee JG, Kang JW, et al. Effects of a low concentration hypochlorous Acid nasal irrigation solution on bacteria, fungi, and virus. *Laryngoscope* 2008;118(10):1862-7. doi: 10.1097/MLG.0b013e31817f4d34
13. Yu MS, Park HW, Kwon HJ, et al. The effect of a low concentration of hypochlorous acid on rhinovirus infection of nasal epithelial cells. *Am J Rhinol Allergy* 2011;25(1):40-4. doi: 10.2500/ajra.2011.25.3545
14. Rutala WA, Weber DJ. Uses of inorganic hypochlorite (bleach) in health-care facilities. *Clin Microbiol Rev* 1997;10(4):597-610.
15. Jordan WE, Jones DV, Klein M. Antiviral effectiveness of chlorine bleach in household laundry use. *Am J Dis Child* 1969;117(3):313-6.
16. Castelao C, da Silva AP, Matos A, et al. Association of myeloperoxidase polymorphism (G463A) with cervix cancer. *Mol Cell Biochem* 2015;404(1-2):1-4. doi: 10.1007/s11010-015-2359-5
17. Winterbourn CC, Kettle AJ. Redox reactions and microbial killing in the neutrophil phagosome. *Antioxid Redox Signal* 2013;18(6):642-60. doi: 10.1089/ars.2012.4827
18. Chen X, Lee KA, Ha EM, et al. A specific and sensitive method for detection of hypochlorous acid for the imaging of microbe-induced HOCl production. *Chem Commun (Camb)* 2011;47(15):4373-5. doi: 10.1039/c1cc10589b
19. Jantsch J, Schatz V, Friedrich D, et al. Cutaneous Na<sup>+</sup> storage strengthens the antimicrobial barrier function of the skin and boosts macrophage-driven host defense. *Cell Metab* 2015;21(3):493-501. doi: 10.1016/j.cmet.2015.02.003
20. Minton K. Antibacterial immunity: a pinch of salt. *Nat Rev Immunol* 2015;15(4):202. doi: 10.1038/nri3835
21. Zhang L, Mendoza-Sassi RA, Wainwright C, et al. Nebulised hypertonic saline solution for acute bronchiolitis in infants. *Cochrane Database Syst Rev* 2013(7):CD006458. doi: 10.1002/14651858.CD006458.pub3

- 1  
2  
3  
4  
5  
6  
7  
8  
9  
10  
11  
12  
13  
14  
15  
16  
17  
18  
19  
20  
21  
22  
23  
24  
25  
26  
27  
28  
29  
30  
31  
32  
33  
34  
35  
36  
37  
38  
39  
40  
41  
42  
43  
44  
45  
46  
47  
48  
49  
50  
51  
52  
53  
54  
55  
56  
57  
58  
59  
60
22. Zhang L, Mendoza-Sassi RA, Klassen TP, et al. Nebulized Hypertonic Saline for Acute Bronchiolitis: A Systematic Review. *Pediatrics* 2015;136(4):687-701. doi: 10.1542/peds.2015-1914
  23. Silver AH, Esteban-Cruciani N, Azzarone G, et al. 3% Hypertonic Saline Versus Normal Saline in Inpatient Bronchiolitis: A Randomized Controlled Trial. *Pediatrics* 2015;136(6):1036-43. doi: 10.1542/peds.2015-1037
  24. Everard ML, Hind D, Ugonna K, et al. SABRE: a multicentre randomised control trial of nebulised hypertonic saline in infants hospitalised with acute bronchiolitis. *Thorax* 2014;69(12):1105-12. doi: 10.1136/thoraxjnl-2014-205953
  25. Cunningham S, Unger SA. Nebulised hypertonic saline in bronchiolitis: take it with a pinch of salt. *Thorax* 2014;69(12):1065-6. doi: 10.1136/thoraxjnl-2014-206210
  26. Grewal S, Klassen TP. The tale of 2 trials: disentangling contradictory evidence on hypertonic saline for acute bronchiolitis. *JAMA Pediatr* 2014;168(7):607-9. doi: 10.1001/jamapediatrics.2014.423
  27. Baron J, El-Chaar G. Hypertonic Saline for the Treatment of Bronchiolitis in Infants and Young Children: A Critical Review of the Literature. *J Pediatr Pharmacol Ther* 2016;21(1):7-26. doi: 10.5863/1551-6776-21.1.7
  28. Badgett RG, Vindhyaal M, Stirnaman JT, et al. A Living Systematic Review of Nebulized Hypertonic Saline for Acute Bronchiolitis in Infants. *JAMA Pediatr* 2015;169(8):788-9. doi: 10.1001/jamapediatrics.2015.0681
  29. Slapak I, Skoupa J, Strnad P, et al. Efficacy of isotonic nasal wash (seawater) in the treatment and prevention of rhinitis in children. *Arch Otolaryngol Head Neck Surg* 2008;134(1):67-74. doi: 10.1001/archoto.2007.19
  30. Koksall T, Cizmeci MN, Bozkaya D, et al. Comparison between the use of saline and seawater for nasal obstruction in children under 2 years of age with acute upper respiratory infection. *Turk J Med Sci* 2016;46(4):1004-13. doi: 10.3906/sag-1507-18
  31. Kassel JC, King D, Spurling GK. Saline nasal irrigation for acute upper respiratory tract infections. *Cochrane Database Syst Rev* 2010(3):CD006821. doi: 10.1002/14651858.CD006821.pub2
  32. Jacobs B, Young NL, Dick PT, et al. Canadian Acute Respiratory Illness and Flu Scale (CARIFS): development of a valid measure for childhood respiratory infections. *J Clin Epidemiol* 2000;53(8):793-9.

#### Authors' contributions:

Sandeep Ramalingam – Planned the study and wrote the protocol

Catriona Graham – Planned the study, revised protocol and approved the final manuscript.

Katherine Oatey – Revised protocol, obtained approvals and approved the final manuscript.

Phillip Rayson – Revised protocol, obtained approvals and approved the final manuscript.

Andrew Stoddart – Revised protocol and approved the final manuscript.

Aziz Sheikh – Planned the study and revised protocol and approved the final manuscript.

Steve Cunningham - Planned the study and revised protocol and approved the final manuscript.

#### Acknowledgements:

The ELVIS Kids Trial Investigators are:

Chief Investigator: Sandeep Ramalingam

Children's Clinical Research Facility (Edinburgh): Brittney Abernathy, Julie Baggot, Ruaridh Buchan, Gillian Black, Steve Cunningham, Louise Frampton, Naomi Matos, Elinore McGivern, Rachel McKernan, Debbie Miller, Margaret Millar, Sheila Mortimer, Finny Paterson, Maxine Ramsay, Joan Thomson, Emma Ward, Jacqueline Waters.

1  
2 Department of Laboratory Medicine, Royal Infirmary of Edinburgh: Alistair Scott, Jenny Dove,  
3 Marianne Cunningham, Lisa Marie Wilson  
4

5 Edinburgh Clinical Trials Unit (ECTU): Ruth Armstrong, Christine Campbell, Gina Cranswick,  
6 Ronnie Harkess, Lynsey Milne, Katherine Oatey, Phillip Rayson, Pamela Sinclair, Michelle  
7 Steven, Andy Stoddart.  
8  
9

10 Pharmacy NHS Lothian. Ruaridh Buchan, Jacqueline Waters

11 Usher Institute: Aziz Sheikh

12 Edinburgh Clinical Research Facility: Emily Evans, Catriona Graham  
13  
14  
15

### 16 **Funding statement:**

17 This work was supported by the Chief Scientist Office, grant number TCS/17/12. The funder had  
18 no role in the design of this study and will not have any role during its execution, analyses,  
19 interpretation of the data, or decision to submit results. Sea Salt was provided by Cornish Sea  
20 Salt Company. Swabs and transport medium were supplied by Copan, Italy. Both Cornish Sea  
21 Salt Company and Copan, Italy had no role in the design of this study and will not have any role  
22 during its execution, analyses, interpretation of the data, or decision to submit results. AS is  
23 supported by HDR UK and BREATHE - The Health Data Research Hub for Respiratory Health  
24 [MC\_PC\_19004]. BREATHE is funded through the UK Research and Innovation Industrial  
25 Strategy Challenge Fund.  
26  
27  
28  
29  
30  
31

32 **Competing interests statement:** No conflicts of interest to declare  
33  
34

### 35 **Figure Legends:**

36  
37 Figure 1: ELVIS Kids Patient Pathway when the child has a URTI at recruitment.  
38

39 Figure 2: ELVIS Kids Patient Pathway when the child does not have a URTI at recruitment.  
40  
41  
42  
43  
44  
45  
46  
47  
48  
49  
50  
51  
52  
53  
54  
55  
56  
57  
58  
59  
60

**Table 1:**

| Study timepoints                                   | Pre-Screening | Baseline | Day 1 | Day 2 | Day 3 | Day 4 | Day 5 | Day 5-8 | Days 5-28 (as applicable) | Day 28 |
|----------------------------------------------------|---------------|----------|-------|-------|-------|-------|-------|---------|---------------------------|--------|
| Pre-Screening                                      | X             |          |       |       |       |       |       |         |                           |        |
| Informed Consent                                   |               | X        |       |       |       |       |       |         |                           |        |
| Eligibility Criteria                               |               | X        |       |       |       |       |       |         |                           |        |
| Eligibility review if change in health information |               |          | X     |       |       |       |       |         |                           |        |
| Randomisation/Treatment Allocation                 |               | X        |       |       |       |       |       |         |                           |        |
| Baseline Case Report Form                          |               | X        |       |       |       |       |       |         |                           |        |
| Nose Swab collection (if child remains unwell)     |               |          | X     | X     | X     | X     | X     |         |                           |        |
| Nose Swab return                                   |               |          |       |       |       |       |       | X       |                           |        |
| Intervention arm - HS Drops                        |               |          | X     | X     | X     | X     | X     |         | X                         |        |
| Daily diary                                        |               |          | X     | X     | X     | X     | X     |         | X                         |        |
| Adverse Events                                     |               |          | X     | X     | X     | X     | X     |         | X                         |        |
| End of illness diary                               |               |          |       |       |       |       |       |         |                           | ← →    |
| Satisfaction questionnaire                         |               |          |       |       |       |       |       |         |                           | ← →    |
| Return of diaries                                  |               |          |       |       |       |       |       |         | X                         |        |
| Day 28 Wheeze question                             |               |          |       |       |       |       |       |         |                           | X      |

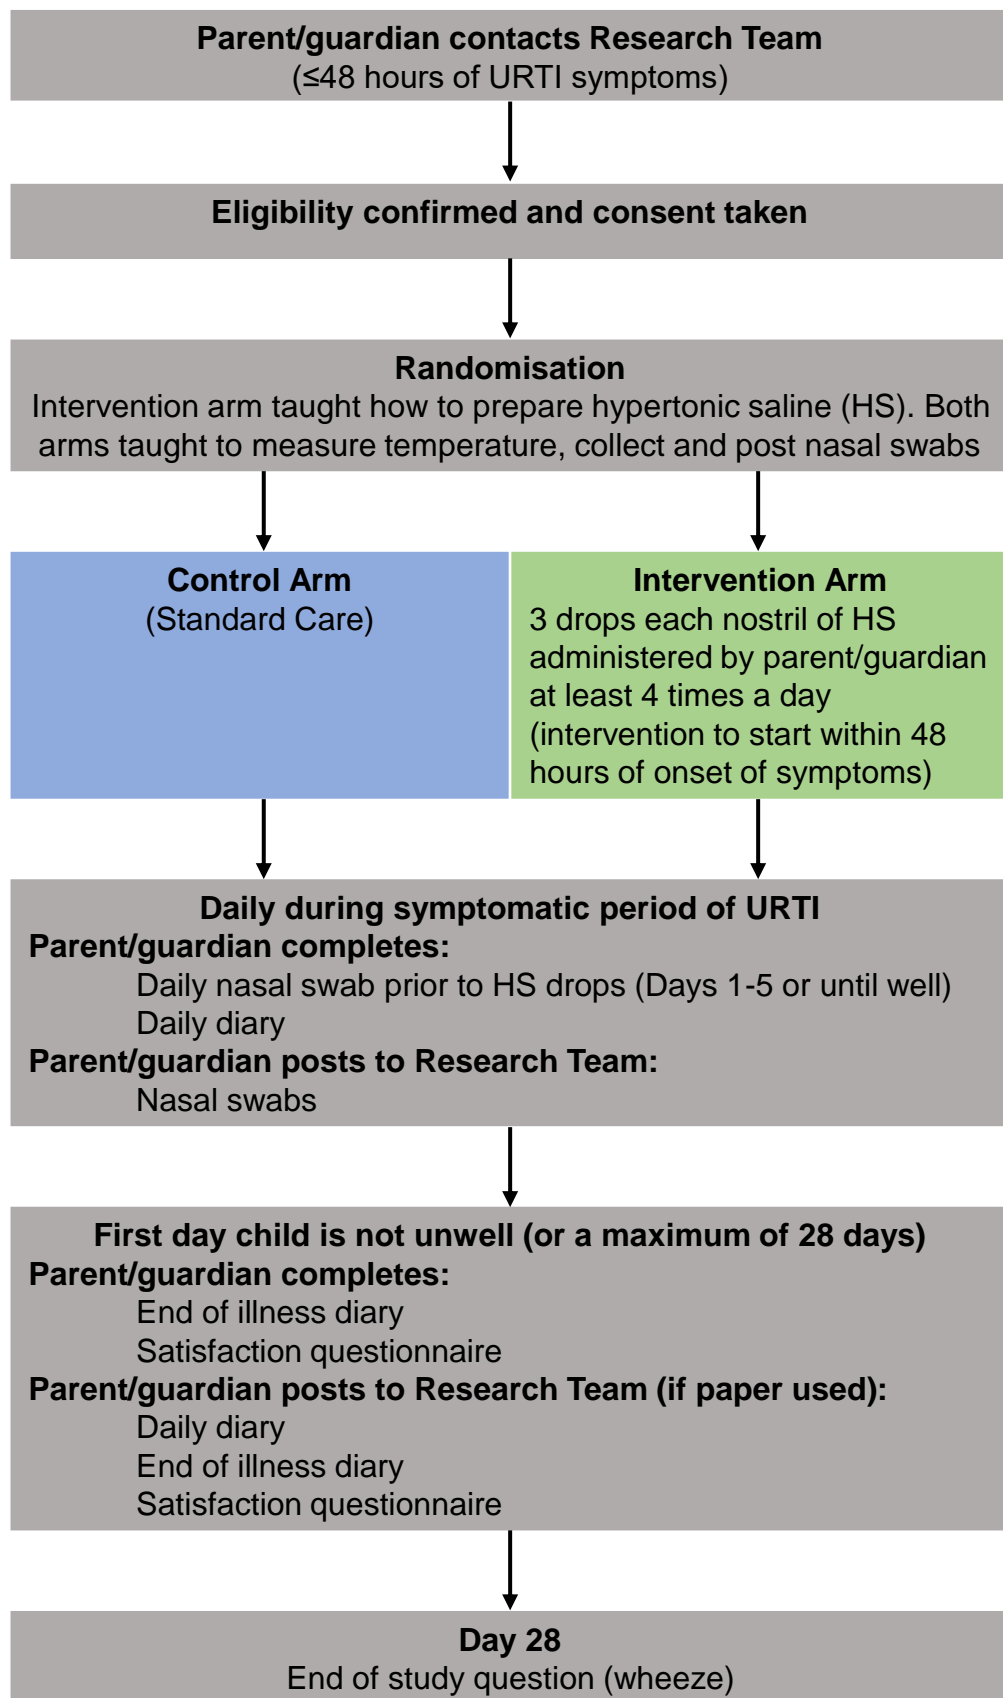

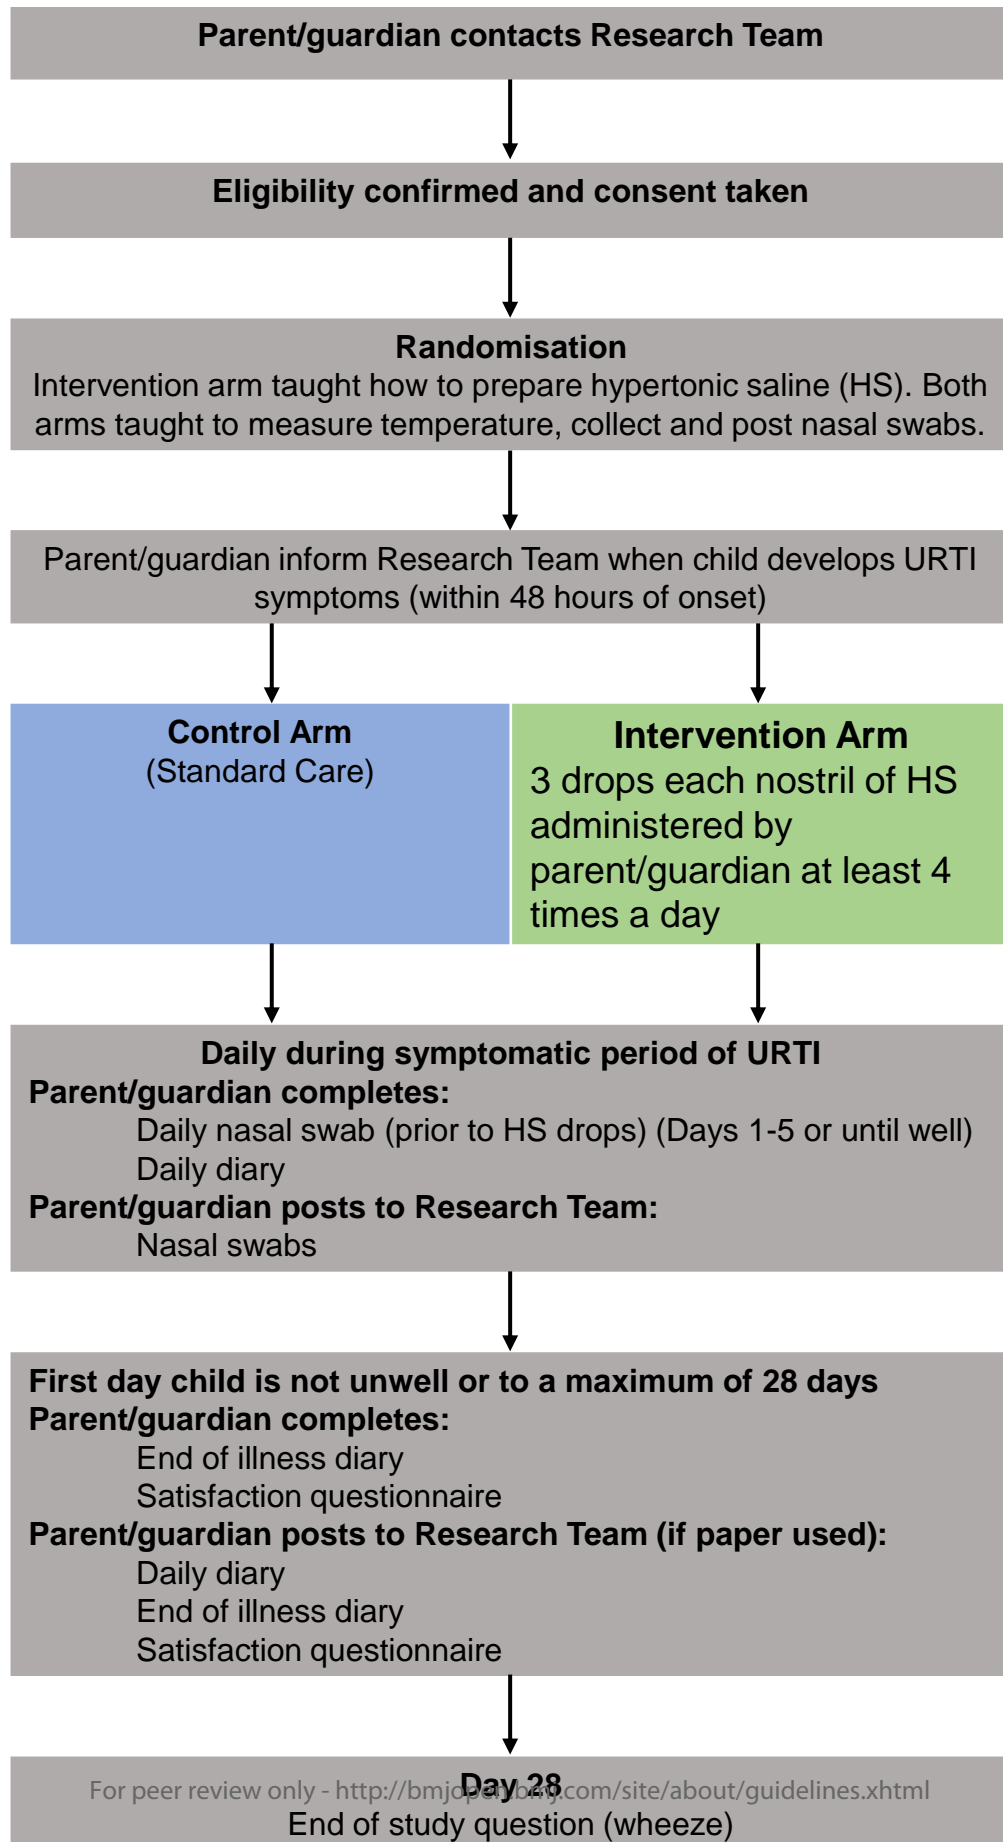



<INSERT  
TRUST  
LOGO>

## ELVIS Kids: Information Sheet for children

**Hello, this is ELVIS. He has a Cold!**



**Elvis does not like a cold.**

**It makes him cough, his nose runs, and he is too tired to play.**

**He wishes there was a cure for the cold!**

**So, Elvis goes to meet the nurse in the hospital to take part in a study.**

1  
2  
3  
4 **The nurse tells Elvis that he will need to**  
5 **take a swab from his nose for a few**  
6 **days. This is like a cotton bud wiping**  
7 **the inside of his nose. This won't hurt**  
8 **but might tickle a bit!**  
9  
10  
11  
12  
13  
14

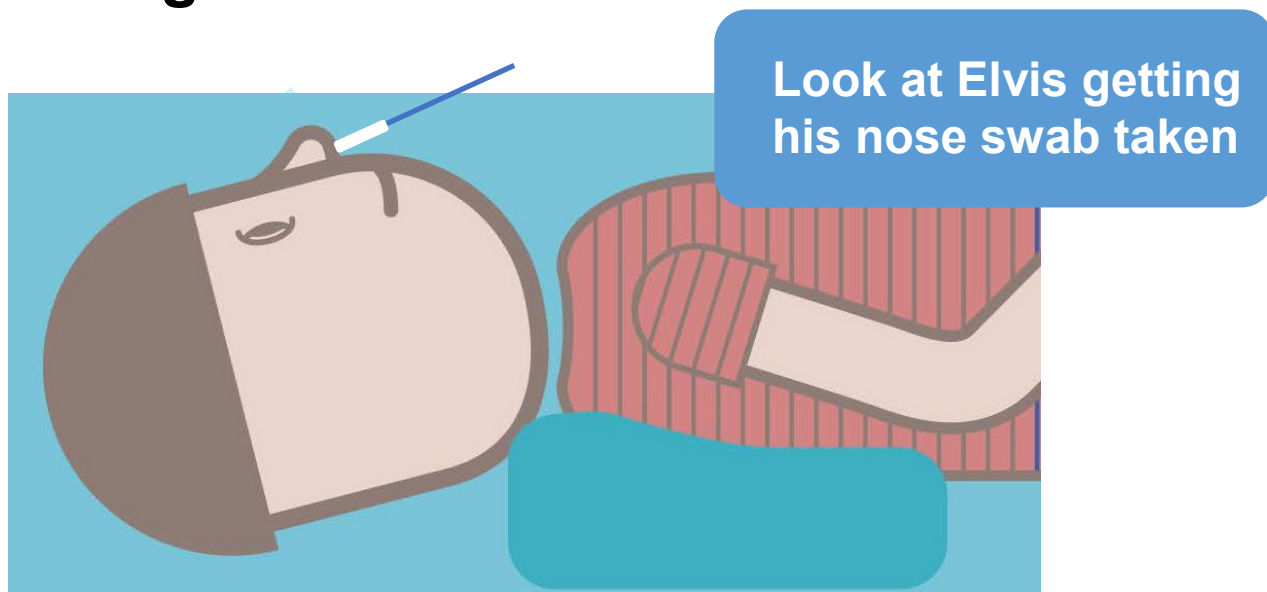

34 **The nurse tells Elvis that he may be in**  
35 **the group of children that need nose**  
36 **drops for their cold until they are well.**  
37  
38  
39  
40  
41  
42

43 **If he is, he will lie down and a few**  
44 **drops of water will be put up his nose**  
45 **by a grown up in his family. This might**  
46 **be tickly or make him want to blow his**  
47 **nose. He will do this every day until his**  
48 **cold gets better.**  
49  
50  
51  
52  
53  
54  
55  
56  
57  
58  
59  
60





Look at Elvis's Mum putting in his nose drops. He is good at lying still!

**Not all the children helping with the study will use nose drops. The nurse will look at their computer to see which children will get them.**

**The nurse tells Elvis that he doesn't have to take part if he doesn't want to and he can change his mind later if he wants. He just needs to tell a grown up.**

**The nurse thanks Elvis for his interest in the study.**

**Do you want to be like Elvis and help the nurse too?**

**What is your name: \_\_\_\_\_**

1  
2  
3  
4 **Colour in this picture of Elvis's Teddy**  
5 **who is visiting the nurse too:**  
6  
7  
8  
9  
10  
11  
12  
13  
14  
15  
16  
17  
18  
19  
20  
21  
22  
23  
24  
25  
26  
27  
28  
29  
30  
31  
32  
33  
34  
35  
36  
37  
38  
39  
40  
41  
42  
43  
44  
45  
46  
47  
48  
49  
50  
51  
52  
53  
54  
55  
56  
57  
58  
59  
60

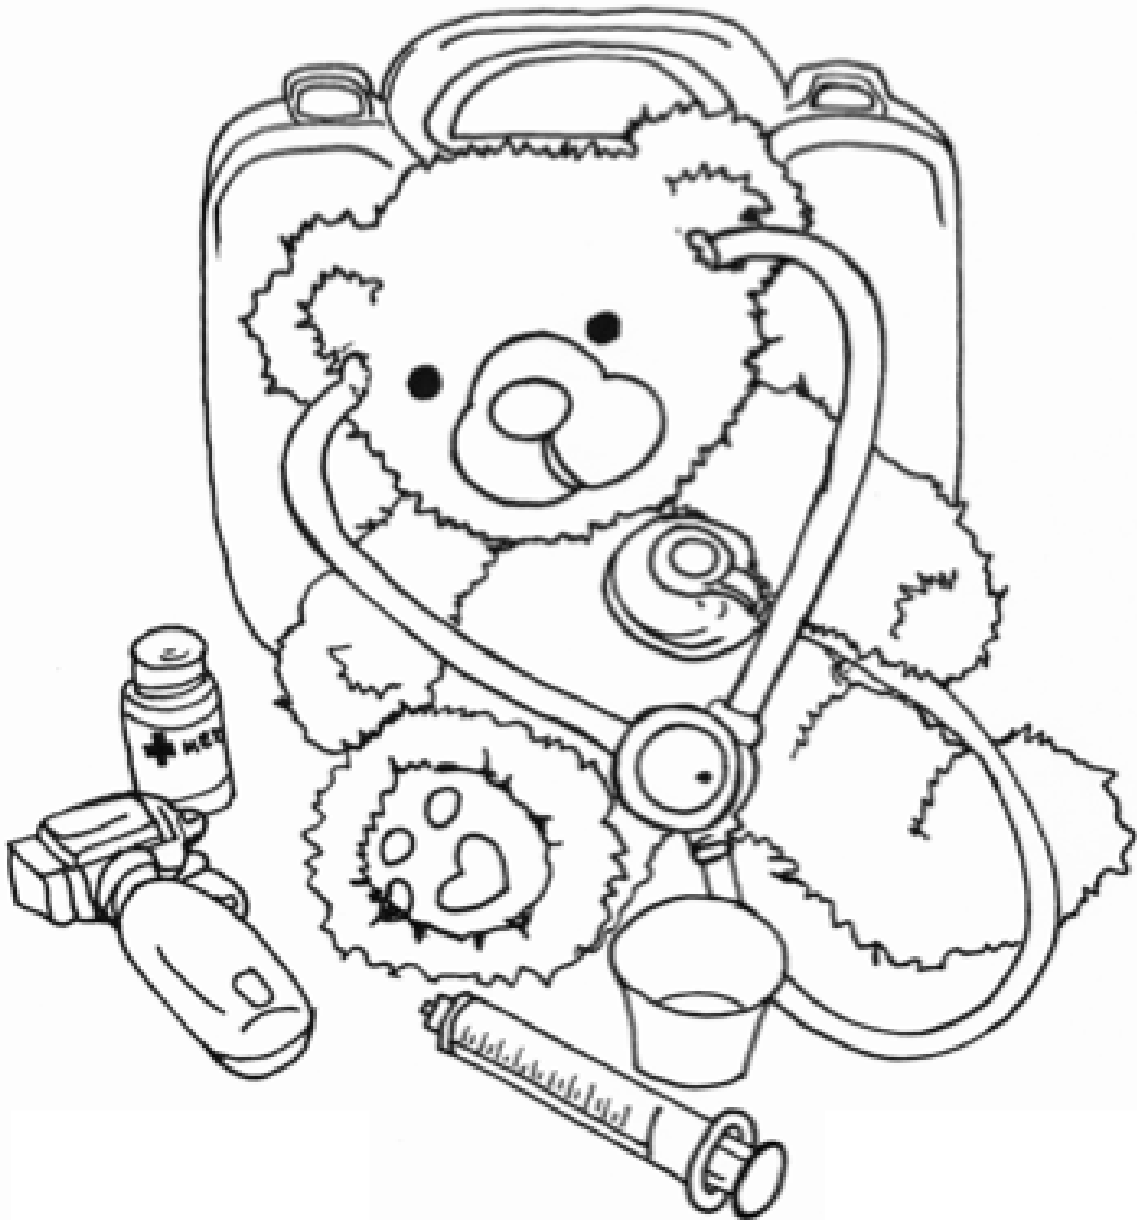

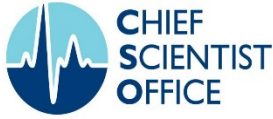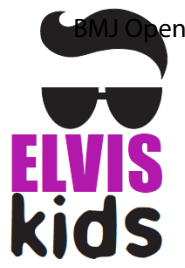

<INSERT TRUST LOGO>

### ELVIS Kids: Assent Form for children

Child to tick all they agree with:

Participant Number:

|                                                               |                                                          |
|---------------------------------------------------------------|----------------------------------------------------------|
| Do you understand what this study is about?                   | Yes <input type="checkbox"/> No <input type="checkbox"/> |
| Have you asked all the questions you want?                    | Yes <input type="checkbox"/> No <input type="checkbox"/> |
| Have you had your questions answered in a way you understand? | Yes <input type="checkbox"/> No <input type="checkbox"/> |
| Are you happy to take part?                                   | Yes <input type="checkbox"/> No <input type="checkbox"/> |

If any answers are 'no' or you don't want to take part, don't sign your name!

If you do want to take part, you can write your name below:

Your name \_\_\_\_\_

Date \_\_\_\_\_

The nurse who explained this project to you needs to sign too:

Print Name \_\_\_\_\_

Sign \_\_\_\_\_

Date \_\_\_\_\_

## Thank you for your help!

<INSERT  
TRUST LOGO>



Participant Number:

| CONSENT FORM: ELVIS Kids |                                                                                                                                                                                                                                                                                                                                                                                                                                                  | Please initial box                                       |
|--------------------------|--------------------------------------------------------------------------------------------------------------------------------------------------------------------------------------------------------------------------------------------------------------------------------------------------------------------------------------------------------------------------------------------------------------------------------------------------|----------------------------------------------------------|
| 1.                       | I confirm that I have read and understand the information sheet (Dated: _____ and Version Number _____) for the above study. I have had the opportunity to consider the information, ask questions and have had these questions answered satisfactorily.                                                                                                                                                                                         | <input type="checkbox"/>                                 |
| 2.                       | I understand that my participation and my child's participation is voluntary and that I am free to withdraw at any time without giving any reason and without my child's medical care and/or legal rights being affected.                                                                                                                                                                                                                        | <input type="checkbox"/>                                 |
| 3.                       | I give permission for the study team to access my child's medical records if needed, to collect data on visits to hospital, and treatment received and to check whether they are suitable to take part in the study.                                                                                                                                                                                                                             | <input type="checkbox"/>                                 |
| 4.                       | I understand that relevant sections of my child's medical notes and data collected during the study may be looked at by individuals in the study team, from the Sponsor (University of Edinburgh and/or NHS Lothian), from NHS <INSERT TRUST NAME> or other regulatory authorities where it is relevant to my child taking part in this study. I give permission for these individuals to have access to my child's data and/or medical records. | <input type="checkbox"/>                                 |
| 5.                       | I give permission for my personal information and my child's personal information (including my child's date of birth, and my telephone number and email address) to be passed to the University of Edinburgh for administration of the study.                                                                                                                                                                                                   | <input type="checkbox"/>                                 |
| 6.                       | I understand that the nose swabs collected from my child will be tested to see which bacteria or viruses have caused my child's cold.                                                                                                                                                                                                                                                                                                            | <input type="checkbox"/>                                 |
| 7.                       | I understand that the nose swabs collected from my child may be tested for human DNA to check the samples have been taken correctly.                                                                                                                                                                                                                                                                                                             | <input type="checkbox"/>                                 |
| 8.                       | I agree to my child's anonymised data and nose swabs being kept for use in future ethically approved studies and I understand the samples will be held securely in the Lothian NRS BioResource.                                                                                                                                                                                                                                                  | Yes <input type="checkbox"/> No <input type="checkbox"/> |
| 9.                       | I understand that as part of future ethically approved studies the samples may be tested for human DNA to identify why some children get more infections or why some children have mild and others have severe illness and consent to it.                                                                                                                                                                                                        | Yes <input type="checkbox"/> No <input type="checkbox"/> |
| 10.                      | I agree to my child's General Practitioner being informed of their participation in the study.                                                                                                                                                                                                                                                                                                                                                   | <input type="checkbox"/>                                 |
| 11.                      | I give permission for the trial researchers to contact me by email, phone and text message during the study.                                                                                                                                                                                                                                                                                                                                     | <input type="checkbox"/>                                 |
| 12.                      | I agree that my child will take part in the above study.                                                                                                                                                                                                                                                                                                                                                                                         | <input type="checkbox"/>                                 |

|                                  |      |           |
|----------------------------------|------|-----------|
| Name of Person Giving Consent    | Date | Signature |
| Name of Person Receiving Consent | Date | Signature |

1x original – into Site File; 1x copy – to Participant; 1x copy – into medical record



# ELVIS Kids Daily Diary (Intervention Arm)

Thanks for your help with ELVIS Kids!

Participant ID:

## Does my child have a cold?

Your child should have at least two of the cold symptoms listed **OR** one cold symptom and one symptom affecting the whole body to start the study. Please record the symptoms your child has for this cold below.

| Cold Symptoms |                           |                          | Whole body Symptoms                 |                           |                                                           |
|---------------|---------------------------|--------------------------|-------------------------------------|---------------------------|-----------------------------------------------------------|
| Stuffy nose   | <input type="radio"/> Yes | <input type="radio"/> No | Fever ( $\geq 38^{\circ}\text{C}$ ) | <input type="radio"/> Yes | <input type="radio"/> No                                  |
| Runny nose    | <input type="radio"/> Yes | <input type="radio"/> No | Low energy/tired                    | <input type="radio"/> Yes | <input type="radio"/> No                                  |
| Cough         | <input type="radio"/> Yes | <input type="radio"/> No | Muscle aches/pains                  | <input type="radio"/> Yes | <input type="radio"/> No <input type="radio"/> Don't Know |
| Sore throat   | <input type="radio"/> Yes | <input type="radio"/> No | Sore head                           | <input type="radio"/> Yes | <input type="radio"/> No <input type="radio"/> Don't Know |

## When did the illness start?

*(Please do not start the study if the cold started more than 48 hours ago)*

**Date Started:**   -    -      
(DD-MMM-YYYY)

**Time Started:**   :    
(24 hour clock)

**If your child's medical details have changed since you first saw the study nurses, please contact the study nurses on STUDY NUMBER before starting the study**

## Did your child receive the nasal flu vaccine within the last 4 weeks?

Yes, my child received the nasal flu vaccine       No my child has not received the nasal flu vaccine

**If you answered YES, please contact the study nurses on STUDY NUMBER before starting the study**

**Date Flu Vaccine Received:**   -    -      
(DD-MMM-YYYY)



Participant ID:

# Daily Diary: Day 1

Date:   -    -     Time (24 hour clock):   :

|                                        |                        |                                |                    |                               |                             |
|----------------------------------------|------------------------|--------------------------------|--------------------|-------------------------------|-----------------------------|
| <i>Select one option</i>               | <b>Not unwell</b><br>0 | <b>Very mildly</b><br>1      2 | <b>Mildly</b><br>3 | <b>Moderately</b><br>4      5 | <b>Severely</b><br>6      7 |
| <b>How unwell is your child today?</b> |                        |                                |                    |                               |                             |

If you ticked 'Not unwell', please skip the next section and go to the 'Other Questions' section

Are these symptoms a problem for your child today? Tick the most appropriate box for each question:

| Symptom                           | No Problem | Minor Problem | Moderate Problem | Major Problem | Don't Know or N/A |
|-----------------------------------|------------|---------------|------------------|---------------|-------------------|
| Poor appetite                     |            |               |                  |               |                   |
| Not sleeping well                 |            |               |                  |               |                   |
| Irritable, cranky, fussy          |            |               |                  |               |                   |
| Feels unwell                      |            |               |                  |               |                   |
| Low energy, tired                 |            |               |                  |               |                   |
| Not playing well                  |            |               |                  |               |                   |
| Crying more than usual            |            |               |                  |               |                   |
| Needing extra care                |            |               |                  |               |                   |
| Clinginess                        |            |               |                  |               |                   |
| Headache                          |            |               |                  |               |                   |
| Sore throat                       |            |               |                  |               |                   |
| Muscle aches or pains             |            |               |                  |               |                   |
| Fever                             |            |               |                  |               |                   |
| Cough                             |            |               |                  |               |                   |
| Nasal congestion, runny nose      |            |               |                  |               |                   |
| Vomiting                          |            |               |                  |               |                   |
| Not interested in what's going on |            |               |                  |               |                   |
| Unable to get out of bed          |            |               |                  |               |                   |

## Other Questions:

How many times did you give the drops in the last day (24 hours)?

Were there any side effects?  Yes  No

If yes, please indicate the severity of symptoms by ticking the following where 0 is none and 5 is the worst it can be.

| Symptom                | None<br>0 | 1 | 2 | 3 | 4 | Max<br>5 |
|------------------------|-----------|---|---|---|---|----------|
| Runny nose             |           |   |   |   |   |          |
| Sneezing               |           |   |   |   |   |          |
| Pain / Sore            |           |   |   |   |   |          |
| Other symptom 1: _____ |           |   |   |   |   |          |
| Other symptom 2: _____ |           |   |   |   |   |          |
| Other symptom 3: _____ |           |   |   |   |   |          |

Was a nose swab collected this morning?  Yes  No

If no, what was the reason?  I forgot  My child refused  I had problems doing it  Other: \_\_\_\_\_



# ELVIS Kids Daily Diary (Control Arm)

Thanks for your help with ELVIS Kids!

Participant ID:

## Does my child have a cold?

Your child should have at least two of the cold symptoms listed **OR** one cold symptom and one symptom affecting the whole body to start the study. Please record the symptoms your child has for this cold below.

| Cold Symptoms |                           |                          | Whole body Symptoms                 |                           |                                                           |
|---------------|---------------------------|--------------------------|-------------------------------------|---------------------------|-----------------------------------------------------------|
| Stuffy nose   | <input type="radio"/> Yes | <input type="radio"/> No | Fever ( $\geq 38^{\circ}\text{C}$ ) | <input type="radio"/> Yes | <input type="radio"/> No                                  |
| Runny nose    | <input type="radio"/> Yes | <input type="radio"/> No | Low energy/tired                    | <input type="radio"/> Yes | <input type="radio"/> No                                  |
| Cough         | <input type="radio"/> Yes | <input type="radio"/> No | Muscle aches/pains                  | <input type="radio"/> Yes | <input type="radio"/> No <input type="radio"/> Don't Know |
| Sore throat   | <input type="radio"/> Yes | <input type="radio"/> No | Sore head                           | <input type="radio"/> Yes | <input type="radio"/> No <input type="radio"/> Don't Know |

## When did the illness start?

*(Please do not start the study if the cold started more than 48 hours ago)*

**Date Started:**   -    -      
(DD-MMM-YYYY)

**Time Started:**   :    
(24 hour clock)

**If your child's medical details have changed since you first saw the study nurses, please contact the study nurses on STUDY NUMBER before starting the study**

## Did your child receive the nasal flu vaccine within the last 4 weeks?

Yes, my child received the nasal flu vaccine       No my child has not received the nasal flu vaccine

**If you answered YES, please contact the study nurses on STUDY NUMBER before starting the study**

**Date Flu Vaccine Received:**   -    -      
(DD-MMM-YYYY)

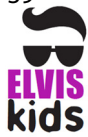

# Daily Diary: Day 1

Date:   -    -

Time (24 hour clock):   :

| Select one option               | Not unwell<br>0      | Very mildly<br>1 2   | Mildly<br>3          | Moderately<br>4 5    | Severely<br>6 7      |
|---------------------------------|----------------------|----------------------|----------------------|----------------------|----------------------|
| How unwell is your child today? | <input type="text"/> |

If you ticked 'Not unwell', please skip the next section and go to the 'Other Questions' section

Are these symptoms a problem for your child today? Tick the most appropriate box for each question:

| Symptom                           | No Problem           | Minor Problem        | Moderate Problem     | Major Problem        | Don't Know or N/A    |
|-----------------------------------|----------------------|----------------------|----------------------|----------------------|----------------------|
| Poor appetite                     | <input type="text"/> |
| Not sleeping well                 | <input type="text"/> |
| Irritable, cranky, fussy          | <input type="text"/> |
| Feels unwell                      | <input type="text"/> |
| Low energy, tired                 | <input type="text"/> |
| Not playing well                  | <input type="text"/> |
| Crying more than usual            | <input type="text"/> |
| Needing extra care                | <input type="text"/> |
| Clinginess                        | <input type="text"/> |
| Headache                          | <input type="text"/> |
| Sore throat                       | <input type="text"/> |
| Muscle aches or pains             | <input type="text"/> |
| Fever                             | <input type="text"/> |
| Cough                             | <input type="text"/> |
| Nasal congestion, runny nose      | <input type="text"/> |
| Vomiting                          | <input type="text"/> |
| Not interested in what's going on | <input type="text"/> |
| Unable to get out of bed          | <input type="text"/> |

## Other Questions:

|                                         |                                                                                                                                                           |
|-----------------------------------------|-----------------------------------------------------------------------------------------------------------------------------------------------------------|
| Was a nose swab collected this morning? | <input type="radio"/> Yes <input type="radio"/> No                                                                                                        |
| If no, what was the reason?             | <input type="radio"/> I forgot <input type="radio"/> My child refused <input type="radio"/> I had problems doing it<br><input type="radio"/> Other: _____ |



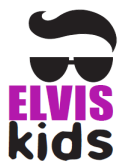

Participant ID:

# End of Illness Diary (*Intervention Arm*)

## END OF ILLNESS DETAILS

Please complete this on the first day your child is well after their cold or after 28 days if your child remains unwell

Date Diary Completed:   -    -      
(DD-MMM-YYYY)

How many adults and children live in the house (including your child who's taking part in ELVIS Kids)?

Adults   Children

Did anybody at home develop the cold after your child?

Yes  No

**If yes, how many were adults?**

**If yes, how many were children?**

How easy was it to apply the nose drops

| Very Easy            | Easy                 | Moderate             | Difficult            | Very Difficult       | Did Not              |
|----------------------|----------------------|----------------------|----------------------|----------------------|----------------------|
| <input type="text"/> |

What was your preferred option?

Cradle child in arms  Lay child on bed  Other: \_\_\_\_\_

Do you think applying nose drops made a difference to your child's symptoms?

Yes  No

Would you do it again if your child had a cold in the future?

Yes  No

**If no, what is the reason? (tick all that apply)**

No improvement  Yes  No

Too difficult  Yes  No

Child did not like it  Yes  No

There were side effects  Yes  No

Other  Yes  No Other: \_\_\_\_\_



# End of Illness Diary (*Intervention Arm*)

## END OF ILLNESS DETAILS (*continued*)

Did your child take over-the-counter medication for their cold?

Yes  No

*If yes, approximately how much did you spend?*

£ .

Did you seek further medical attention related to the cold?

Yes  No

*If yes, how many times did you use each of the following?*

a. Telephone contact GP?

b. Telephone contact out of hours GP?

c. Telephone contact NHS 24?

d. Attended GP?

e. Attended out of hours GP?

f. GP Home visit?

g. Attended hospital?

h. Was your child admitted to hospital?

Yes  No

*If yes, number of days and what was the reason*

Number of days:  Reason: \_\_\_\_\_

Does your child attend nursery/school?

Yes  No

*If yes, number of days your child missed nursery/school during this cold*

Number of days or work missed by adults to take care of your child

Has your child had wheezing or whistling in the chest while they had this cold?

Yes  No

*If yes, how many days did your child have wheezing or whistling?*

Participant ID: 

# End of Illness Diary (*Control Arm*)

## END OF ILLNESS DETAILS

Please complete this on the first day your child is well after their cold or after 28 days if your child remains unwell

Date Diary Completed: --  
(DD-MMM-YYYY)

How many adults and children live in the house (including your child who's taking part in ELVIS Kids)?

Adults  Children

Did anybody at home develop the cold after your child?

Yes  No

*If yes, how many were adults?*

*If yes, how many were children?*

Did you use salt water nose drops/sprays for your child's cold?

Yes  No

*If yes, what is the name of the drops/sprays you used?*

*How many days did you use the drops/sprays?*

*How many times per day did you use the drops/sprays?*

Did your child take over-the-counter medication for their cold?

Yes  No

*If yes, approximately how much did you spend?*

£



# End of Illness Diary (Control Arm)

## END OF ILLNESS DETAILS (continued)

Did you seek further medical attention related to the cold?

Yes  No

***If yes, how many times did you use each of the following?***

- a. Telephone contact GP?
- b. Telephone contact out of hours GP?
- c. Telephone contact NHS 24?
- d. Attended GP?
- e. Attended out of hours GP?
- f. GP Home visit?
- g. Attended hospital?
- h. Was your child admitted to hospital?

Yes  No

*If yes, number of days and diagnosis*

Number of days:  Diagnosis: \_\_\_\_\_

Does your child attend nursery/school?

Yes  No

***If yes, number of days your child missed nursery/school during this cold***

Number of days or work missed by adults to take care of your child

Has your child had wheezing or whistling in their chest while they had this cold?

Yes  No

***If yes, how many days did your child have wheezing or whistling?***

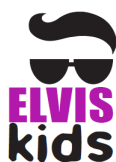

Participant ID:

# Satisfaction Questionnaire

## About the Study

**Q1. How easy was it to collect the swabs?**

| Very Easy | Easy | Moderate | Difficult | Very Difficult | Did Not |
|-----------|------|----------|-----------|----------------|---------|
|           |      |          |           |                |         |

**Q2. How would you rate the comfort level of your child with the swabs?**

| Very Comfortable | Comfortable | Moderately Comfortable | Uncomfortable | Very Uncomfortable | Did Not |
|------------------|-------------|------------------------|---------------|--------------------|---------|
|                  |             |                        |               |                    |         |

**Q3. How easy was it to return samples?**

| Very Easy | Easy | Moderate | Difficult | Very Difficult | Did Not |
|-----------|------|----------|-----------|----------------|---------|
|           |      |          |           |                |         |

**Q4. How easy was it to complete the daily diary?**

| Very Easy | Easy | Moderate | Difficult | Very Difficult | Did Not |
|-----------|------|----------|-----------|----------------|---------|
|           |      |          |           |                |         |

**Q5. Based on your experience, do you have any suggestions for improving the trial procedures in the future?**



# Day 28 Wheeze Details

## DAY 28 WHEEZE DETAILS

Between your child's cold ending and today, did your child develop wheezing or whistling in their chest?

Yes  No

If yes, how many days did your child have wheezing or whistling?

*(Please enter a number, e.g. 4)*

For peer review only

1  
2  
3  
4  
5  
6  
7  
8  
9  
10  
11  
12  
13  
14  
15  
16  
17  
18  
19  
20  
21  
22  
23  
24  
25  
26  
27  
28  
29  
30  
31  
32  
33  
34  
35  
36  
37  
38  
39  
40  
41  
42  
43  
44  
45  
46  
47  
48  
49  
50  
51  
52  
53  
54  
55  
56  
57  
58  
59  
60



SPIRIT 2013 Checklist: Recommended items to address in a clinical trial protocol and related documents\*

| Section/item                      | Item No | Description                                                                                                                                                                                                                                                                              | Addressed on page number |
|-----------------------------------|---------|------------------------------------------------------------------------------------------------------------------------------------------------------------------------------------------------------------------------------------------------------------------------------------------|--------------------------|
| <b>Administrative information</b> |         |                                                                                                                                                                                                                                                                                          |                          |
| Title                             | 1       | Descriptive title identifying the study design, population, interventions, and, if applicable, trial acronym                                                                                                                                                                             | ___ 1 ___                |
| Trial registration                | 2a      | Trial identifier and registry name. If not yet registered, name of intended registry                                                                                                                                                                                                     | ___ 2 ___                |
|                                   | 2b      | All items from the World Health Organization Trial Registration Data Set                                                                                                                                                                                                                 | ___ 1-18 ___             |
| Protocol version                  | 3       | Date and version identifier                                                                                                                                                                                                                                                              | ___ 12 ___               |
| Funding                           | 4       | Sources and types of financial, material, and other support                                                                                                                                                                                                                              | ___ 15 ___               |
| Roles and responsibilities        | 5a      | Names, affiliations, and roles of protocol contributors                                                                                                                                                                                                                                  | ___ 14 ___               |
|                                   | 5b      | Name and contact information for the trial sponsor                                                                                                                                                                                                                                       | ___ 2,11 ___             |
|                                   | 5c      | Role of study sponsor and funders, if any, in study design; collection, management, analysis, and interpretation of data; writing of the report; and the decision to submit the report for publication, including whether they will have ultimate authority over any of these activities | ___ 11,12 ___            |
|                                   | 5d      | Composition, roles, and responsibilities of the coordinating centre, steering committee, endpoint adjudication committee, data management team, and other individuals or groups overseeing the trial, if applicable (see Item 21a for data monitoring committee)                         | ___ 11 ___               |

|    |                                                           |     |                                                                                                               |                   |
|----|-----------------------------------------------------------|-----|---------------------------------------------------------------------------------------------------------------|-------------------|
| 1  | <b>Introduction</b>                                       |     |                                                                                                               |                   |
| 2  |                                                           |     |                                                                                                               |                   |
| 3  | Background and                                            | 6a  | Description of research question and justification for undertaking the trial, including summary of relevant   | _____ 3-4 _____   |
| 4  | rationale                                                 |     | studies (published and unpublished) examining benefits and harms for each intervention                        |                   |
| 5  |                                                           |     |                                                                                                               |                   |
| 6  |                                                           | 6b  | Explanation for choice of comparators                                                                         | _____ 4 _____     |
| 7  |                                                           |     |                                                                                                               |                   |
| 8  | Objectives                                                | 7   | Specific objectives or hypotheses                                                                             | _____ 4-5 _____   |
| 9  |                                                           |     |                                                                                                               |                   |
| 10 | Trial design                                              | 8   | Description of trial design including type of trial (eg, parallel group, crossover, factorial, single group), |                   |
| 11 |                                                           |     | allocation ratio, and framework (eg, superiority, equivalence, noninferiority, exploratory)                   | _____ 5 _____     |
| 12 |                                                           |     |                                                                                                               |                   |
| 13 |                                                           |     |                                                                                                               |                   |
| 14 | <b>Methods: Participants, interventions, and outcomes</b> |     |                                                                                                               |                   |
| 15 |                                                           |     |                                                                                                               |                   |
| 16 | Study setting                                             | 9   | Description of study settings (eg, community clinic, academic hospital) and list of countries where data will | _____ 5 _____     |
| 17 |                                                           |     | be collected. Reference to where list of study sites can be obtained                                          |                   |
| 18 |                                                           |     |                                                                                                               |                   |
| 19 | Eligibility criteria                                      | 10  | Inclusion and exclusion criteria for participants. If applicable, eligibility criteria for study centres and  | _____ 6 _____     |
| 20 |                                                           |     | individuals who will perform the interventions (eg, surgeons, psychotherapists)                               |                   |
| 21 |                                                           |     |                                                                                                               |                   |
| 22 | Interventions                                             | 11a | Interventions for each group with sufficient detail to allow replication, including how and when they will be | _____ 7 _____     |
| 23 |                                                           |     | administered                                                                                                  |                   |
| 24 |                                                           |     |                                                                                                               |                   |
| 25 |                                                           | 11b | Criteria for discontinuing or modifying allocated interventions for a given trial participant (eg, drug dose  | _____ 7 _____     |
| 26 |                                                           |     | change in response to harms, participant request, or improving/worsening disease)                             |                   |
| 27 |                                                           |     |                                                                                                               |                   |
| 28 |                                                           | 11c | Strategies to improve adherence to intervention protocols, and any procedures for monitoring adherence        | _____ 8 _____     |
| 29 |                                                           |     | (eg, drug tablet return, laboratory tests)                                                                    |                   |
| 30 |                                                           |     |                                                                                                               |                   |
| 31 |                                                           | 11d | Relevant concomitant care and interventions that are permitted or prohibited during the trial                 | _____ 5,6 _____   |
| 32 |                                                           |     |                                                                                                               |                   |
| 33 | Outcomes                                                  | 12  | Primary, secondary, and other outcomes, including the specific measurement variable (eg, systolic blood       |                   |
| 34 |                                                           |     | pressure), analysis metric (eg, change from baseline, final value, time to event), method of aggregation      | _____ 9,10 _____  |
| 35 |                                                           |     | (eg, median, proportion), and time point for each outcome. Explanation of the clinical relevance of chosen    |                   |
| 36 |                                                           |     | efficacy and harm outcomes is strongly recommended                                                            |                   |
| 37 |                                                           |     |                                                                                                               |                   |
| 38 | Participant timeline                                      | 13  | Time schedule of enrolment, interventions (including any run-ins and washouts), assessments, and visits       | _____ 10,16 _____ |
| 39 |                                                           |     | for participants. A schematic diagram is highly recommended (see Figure)                                      |                   |
| 40 |                                                           |     |                                                                                                               |                   |
| 41 |                                                           |     |                                                                                                               |                   |
| 42 |                                                           |     |                                                                                                               |                   |
| 43 |                                                           |     |                                                                                                               |                   |
| 44 |                                                           |     |                                                                                                               |                   |
| 45 |                                                           |     |                                                                                                               |                   |
| 46 |                                                           |     |                                                                                                               |                   |



|   |             |    |                                                                                                                                                                                       |              |
|---|-------------|----|---------------------------------------------------------------------------------------------------------------------------------------------------------------------------------------|--------------|
| 1 | Sample size | 14 | Estimated number of participants needed to achieve study objectives and how it was determined, including clinical and statistical assumptions supporting any sample size calculations | _____10_____ |
| 2 |             |    |                                                                                                                                                                                       |              |
| 3 |             |    |                                                                                                                                                                                       |              |
| 4 | Recruitment | 15 | Strategies for achieving adequate participant enrolment to reach target sample size                                                                                                   | _____5_____  |
| 5 |             |    |                                                                                                                                                                                       |              |

### 6 **Methods: Assignment of interventions (for controlled trials)**

#### 7 Allocation:

|    |                    |     |                                                                                                                                                                                                                                                                                                                                                          |              |
|----|--------------------|-----|----------------------------------------------------------------------------------------------------------------------------------------------------------------------------------------------------------------------------------------------------------------------------------------------------------------------------------------------------------|--------------|
| 8  |                    |     |                                                                                                                                                                                                                                                                                                                                                          |              |
| 9  |                    |     |                                                                                                                                                                                                                                                                                                                                                          |              |
| 10 | Sequence           | 16a | Method of generating the allocation sequence (eg, computer-generated random numbers), and list of any factors for stratification. To reduce predictability of a random sequence, details of any planned restriction (eg, blocking) should be provided in a separate document that is unavailable to those who enrol participants or assign interventions | _____7_____  |
| 11 | generation         |     |                                                                                                                                                                                                                                                                                                                                                          |              |
| 12 |                    |     |                                                                                                                                                                                                                                                                                                                                                          |              |
| 13 |                    |     |                                                                                                                                                                                                                                                                                                                                                          |              |
| 14 |                    |     |                                                                                                                                                                                                                                                                                                                                                          |              |
| 15 |                    |     |                                                                                                                                                                                                                                                                                                                                                          |              |
| 16 | Allocation         | 16b | Mechanism of implementing the allocation sequence (eg, central telephone; sequentially numbered, opaque, sealed envelopes), describing any steps to conceal the sequence until interventions are assigned                                                                                                                                                | _____7_____  |
| 17 | concealment        |     |                                                                                                                                                                                                                                                                                                                                                          |              |
| 18 | mechanism          |     |                                                                                                                                                                                                                                                                                                                                                          |              |
| 19 |                    |     |                                                                                                                                                                                                                                                                                                                                                          |              |
| 20 | Implementation     | 16c | Who will generate the allocation sequence, who will enrol participants, and who will assign participants to interventions                                                                                                                                                                                                                                | _____7_____  |
| 21 |                    |     |                                                                                                                                                                                                                                                                                                                                                          |              |
| 22 |                    |     |                                                                                                                                                                                                                                                                                                                                                          |              |
| 23 |                    |     |                                                                                                                                                                                                                                                                                                                                                          |              |
| 24 | Blinding (masking) | 17a | Who will be blinded after assignment to interventions (eg, trial participants, care providers, outcome assessors, data analysts), and how                                                                                                                                                                                                                | _____7_____  |
| 25 |                    |     |                                                                                                                                                                                                                                                                                                                                                          |              |
| 26 |                    |     |                                                                                                                                                                                                                                                                                                                                                          |              |
| 27 |                    | 17b | If blinded, circumstances under which unblinding is permissible, and procedure for revealing a participant's allocated intervention during the trial                                                                                                                                                                                                     | _____NA_____ |
| 28 |                    |     |                                                                                                                                                                                                                                                                                                                                                          |              |
| 29 |                    |     |                                                                                                                                                                                                                                                                                                                                                          |              |
| 30 |                    |     |                                                                                                                                                                                                                                                                                                                                                          |              |

### 31 **Methods: Data collection, management, and analysis**

|    |                 |     |                                                                                                                                                                                                                                                                                                                                                                                                              |                     |
|----|-----------------|-----|--------------------------------------------------------------------------------------------------------------------------------------------------------------------------------------------------------------------------------------------------------------------------------------------------------------------------------------------------------------------------------------------------------------|---------------------|
| 32 |                 |     |                                                                                                                                                                                                                                                                                                                                                                                                              |                     |
| 33 | Data collection | 18a | Plans for assessment and collection of outcome, baseline, and other trial data, including any related processes to promote data quality (eg, duplicate measurements, training of assessors) and a description of study instruments (eg, questionnaires, laboratory tests) along with their reliability and validity, if known. Reference to where data collection forms can be found, if not in the protocol | _____8,10-12_____   |
| 34 | methods         |     |                                                                                                                                                                                                                                                                                                                                                                                                              |                     |
| 35 |                 |     |                                                                                                                                                                                                                                                                                                                                                                                                              |                     |
| 36 |                 |     |                                                                                                                                                                                                                                                                                                                                                                                                              |                     |
| 37 |                 |     |                                                                                                                                                                                                                                                                                                                                                                                                              |                     |
| 38 |                 | 18b | Plans to promote participant retention and complete follow-up, including list of any outcome data to be collected for participants who discontinue or deviate from intervention protocols                                                                                                                                                                                                                    | _____7,8,10-12_____ |
| 39 |                 |     |                                                                                                                                                                                                                                                                                                                                                                                                              |                     |
| 40 |                 |     |                                                                                                                                                                                                                                                                                                                                                                                                              |                     |
| 41 |                 |     |                                                                                                                                                                                                                                                                                                                                                                                                              |                     |
| 42 |                 |     |                                                                                                                                                                                                                                                                                                                                                                                                              |                     |

|    |                                 |     |                                                                                                                                                                                                                                                                                                                                       |               |
|----|---------------------------------|-----|---------------------------------------------------------------------------------------------------------------------------------------------------------------------------------------------------------------------------------------------------------------------------------------------------------------------------------------|---------------|
| 1  | Data management                 | 19  | Plans for data entry, coding, security, and storage, including any related processes to promote data quality (eg, double data entry; range checks for data values). Reference to where details of data management procedures can be found, if not in the protocol                                                                     | ___ 6,10 ___  |
| 2  |                                 |     |                                                                                                                                                                                                                                                                                                                                       |               |
| 3  |                                 |     |                                                                                                                                                                                                                                                                                                                                       |               |
| 4  |                                 |     |                                                                                                                                                                                                                                                                                                                                       |               |
| 5  | Statistical methods             | 20a | Statistical methods for analysing primary and secondary outcomes. Reference to where other details of the statistical analysis plan can be found, if not in the protocol                                                                                                                                                              | ___ 10,11 ___ |
| 6  |                                 |     |                                                                                                                                                                                                                                                                                                                                       |               |
| 7  |                                 |     |                                                                                                                                                                                                                                                                                                                                       |               |
| 8  |                                 | 20b | Methods for any additional analyses (eg, subgroup and adjusted analyses)                                                                                                                                                                                                                                                              | ___ 11 ___    |
| 9  |                                 |     |                                                                                                                                                                                                                                                                                                                                       |               |
| 10 |                                 | 20c | Definition of analysis population relating to protocol non-adherence (eg, as randomised analysis), and any statistical methods to handle missing data (eg, multiple imputation)                                                                                                                                                       | ___ 11 ___    |
| 11 |                                 |     |                                                                                                                                                                                                                                                                                                                                       |               |
| 12 |                                 |     |                                                                                                                                                                                                                                                                                                                                       |               |
| 13 |                                 |     |                                                                                                                                                                                                                                                                                                                                       |               |
| 14 | <b>Methods: Monitoring</b>      |     |                                                                                                                                                                                                                                                                                                                                       |               |
| 15 |                                 |     |                                                                                                                                                                                                                                                                                                                                       |               |
| 16 | Data monitoring                 | 21a | Composition of data monitoring committee (DMC); summary of its role and reporting structure; statement of whether it is independent from the sponsor and competing interests; and reference to where further details about its charter can be found, if not in the protocol. Alternatively, an explanation of why a DMC is not needed | ___ 11 ___    |
| 17 |                                 |     |                                                                                                                                                                                                                                                                                                                                       |               |
| 18 |                                 |     |                                                                                                                                                                                                                                                                                                                                       |               |
| 19 |                                 |     |                                                                                                                                                                                                                                                                                                                                       |               |
| 20 |                                 |     |                                                                                                                                                                                                                                                                                                                                       |               |
| 21 |                                 |     |                                                                                                                                                                                                                                                                                                                                       |               |
| 22 |                                 | 21b | Description of any interim analyses and stopping guidelines, including who will have access to these interim results and make the final decision to terminate the trial                                                                                                                                                               | ___ NA ___    |
| 23 |                                 |     |                                                                                                                                                                                                                                                                                                                                       |               |
| 24 |                                 |     |                                                                                                                                                                                                                                                                                                                                       |               |
| 25 | Harms                           | 22  | Plans for collecting, assessing, reporting, and managing solicited and spontaneously reported adverse events and other unintended effects of trial interventions or trial conduct                                                                                                                                                     | ___ 5,10 ___  |
| 26 |                                 |     |                                                                                                                                                                                                                                                                                                                                       |               |
| 27 |                                 |     |                                                                                                                                                                                                                                                                                                                                       |               |
| 28 | Auditing                        | 23  | Frequency and procedures for auditing trial conduct, if any, and whether the process will be independent from investigators and the sponsor                                                                                                                                                                                           | ___ NA ___    |
| 29 |                                 |     |                                                                                                                                                                                                                                                                                                                                       |               |
| 30 |                                 |     |                                                                                                                                                                                                                                                                                                                                       |               |
| 31 |                                 |     |                                                                                                                                                                                                                                                                                                                                       |               |
| 32 | <b>Ethics and dissemination</b> |     |                                                                                                                                                                                                                                                                                                                                       |               |
| 33 |                                 |     |                                                                                                                                                                                                                                                                                                                                       |               |
| 34 | Research ethics approval        | 24  | Plans for seeking research ethics committee/institutional review board (REC/IRB) approval                                                                                                                                                                                                                                             | ___ 11 ___    |
| 35 |                                 |     |                                                                                                                                                                                                                                                                                                                                       |               |
| 36 |                                 |     |                                                                                                                                                                                                                                                                                                                                       |               |
| 37 | Protocol amendments             | 25  | Plans for communicating important protocol modifications (eg, changes to eligibility criteria, outcomes, analyses) to relevant parties (eg, investigators, REC/IRBs, trial participants, trial registries, journals, regulators)                                                                                                      | ___ 11 ___    |
| 38 |                                 |     |                                                                                                                                                                                                                                                                                                                                       |               |
| 39 |                                 |     |                                                                                                                                                                                                                                                                                                                                       |               |
| 40 |                                 |     |                                                                                                                                                                                                                                                                                                                                       |               |
| 41 |                                 |     |                                                                                                                                                                                                                                                                                                                                       |               |
| 42 |                                 |     |                                                                                                                                                                                                                                                                                                                                       |               |
| 43 |                                 |     |                                                                                                                                                                                                                                                                                                                                       |               |
| 44 |                                 |     |                                                                                                                                                                                                                                                                                                                                       |               |
| 45 |                                 |     |                                                                                                                                                                                                                                                                                                                                       |               |
| 46 |                                 |     |                                                                                                                                                                                                                                                                                                                                       |               |

|    |                               |     |                                                                                                                                                                                                                                                                                     |                   |
|----|-------------------------------|-----|-------------------------------------------------------------------------------------------------------------------------------------------------------------------------------------------------------------------------------------------------------------------------------------|-------------------|
| 1  | Consent or assent             | 26a | Who will obtain informed consent or assent from potential trial participants or authorised surrogates, and how (see Item 32)                                                                                                                                                        | _____ 6,7 _____   |
| 2  |                               |     |                                                                                                                                                                                                                                                                                     |                   |
| 3  |                               |     |                                                                                                                                                                                                                                                                                     |                   |
| 4  |                               | 26b | Additional consent provisions for collection and use of participant data and biological specimens in ancillary studies, if applicable                                                                                                                                               | _____ 6,7 _____   |
| 5  |                               |     |                                                                                                                                                                                                                                                                                     |                   |
| 6  |                               |     |                                                                                                                                                                                                                                                                                     |                   |
| 7  | Confidentiality               | 27  | How personal information about potential and enrolled participants will be collected, shared, and maintained in order to protect confidentiality before, during, and after the trial                                                                                                | _____ 11,12 _____ |
| 8  |                               |     |                                                                                                                                                                                                                                                                                     |                   |
| 9  |                               |     |                                                                                                                                                                                                                                                                                     |                   |
| 10 | Declaration of interests      | 28  | Financial and other competing interests for principal investigators for the overall trial and each study site                                                                                                                                                                       | _____ 15 _____    |
| 11 |                               |     |                                                                                                                                                                                                                                                                                     |                   |
| 12 |                               |     |                                                                                                                                                                                                                                                                                     |                   |
| 13 | Access to data                | 29  | Statement of who will have access to the final trial dataset, and disclosure of contractual agreements that limit such access for investigators                                                                                                                                     | _____ 10-12 _____ |
| 14 |                               |     |                                                                                                                                                                                                                                                                                     |                   |
| 15 |                               |     |                                                                                                                                                                                                                                                                                     |                   |
| 16 | Ancillary and post-trial care | 30  | Provisions, if any, for ancillary and post-trial care, and for compensation to those who suffer harm from trial participation                                                                                                                                                       | _____ NA _____    |
| 17 |                               |     |                                                                                                                                                                                                                                                                                     |                   |
| 18 |                               |     |                                                                                                                                                                                                                                                                                     |                   |
| 19 |                               |     |                                                                                                                                                                                                                                                                                     |                   |
| 20 | Dissemination policy          | 31a | Plans for investigators and sponsor to communicate trial results to participants, healthcare professionals, the public, and other relevant groups (eg, via publication, reporting in results databases, or other data sharing arrangements), including any publication restrictions | _____ 11 _____    |
| 21 |                               |     |                                                                                                                                                                                                                                                                                     |                   |
| 22 |                               |     |                                                                                                                                                                                                                                                                                     |                   |
| 23 |                               |     |                                                                                                                                                                                                                                                                                     |                   |
| 24 |                               | 31b | Authorship eligibility guidelines and any intended use of professional writers                                                                                                                                                                                                      | _____ NA _____    |
| 25 |                               |     |                                                                                                                                                                                                                                                                                     |                   |
| 26 |                               | 31c | Plans, if any, for granting public access to the full protocol, participant-level dataset, and statistical code                                                                                                                                                                     | _____ NA _____    |
| 27 |                               |     |                                                                                                                                                                                                                                                                                     |                   |
| 28 |                               |     |                                                                                                                                                                                                                                                                                     |                   |
| 29 | <b>Appendices</b>             |     |                                                                                                                                                                                                                                                                                     |                   |
| 30 |                               |     |                                                                                                                                                                                                                                                                                     |                   |
| 31 | Informed consent materials    | 32  | Model consent form and other related documentation given to participants and authorised surrogates                                                                                                                                                                                  | _____ 7-9 _____   |
| 32 |                               |     |                                                                                                                                                                                                                                                                                     |                   |
| 33 |                               |     |                                                                                                                                                                                                                                                                                     |                   |
| 34 | Biological specimens          | 33  | Plans for collection, laboratory evaluation, and storage of biological specimens for genetic or molecular analysis in the current trial and for future use in ancillary studies, if applicable                                                                                      | _____ 9 _____     |
| 35 |                               |     |                                                                                                                                                                                                                                                                                     |                   |
| 36 |                               |     |                                                                                                                                                                                                                                                                                     |                   |

\*It is strongly recommended that this checklist be read in conjunction with the SPIRIT 2013 Explanation & Elaboration for important clarification on the items. Amendments to the protocol should be tracked and dated. The SPIRIT checklist is copyrighted by the SPIRIT Group under the Creative Commons [“Attribution-NonCommercial-NoDerivs 3.0 Unported”](https://creativecommons.org/licenses/by-nc-nd/3.0/) license.
