# Supplementary material for: Study protocol of the Edinburgh and Lothian Virus Intervention Study in Kids: a randomised controlled trial of hypertonic saline nose drops in children with upper respiratory tract infections (ELVIS Kids)
Source: PubMed Central journal article supplement — BMJ Open. 2021 May 5;11(5):e049964. doi: 10.1136/bmjopen-2021-049964 (PMC8103393; doi:10.1136/bmjopen-2021-049964), 2021-05-05
Supplement: bmjopen-2021-049964.reviewer_comments.pdf [file bmjopen-2021-049964.reviewer_comments.pdf]

## PEER REVIEW HISTORY

BMJ Open publishes all reviews undertaken for accepted manuscripts. Reviewers are asked to complete a checklist review form (<http://bmjopen.bmj.com/site/about/resources/checklist.pdf>) and are provided with free text boxes to elaborate on their assessment. These free text comments are reproduced below.

## ARTICLE DETAILS

|                            |                                                                                                                                                                                                              |
|----------------------------|--------------------------------------------------------------------------------------------------------------------------------------------------------------------------------------------------------------|
| <b>TITLE (PROVISIONAL)</b> | Study protocol of the Edinburgh and Lothian Virus Intervention Study in Kids: A randomised controlled trial of hypertonic saline nose drops in children with upper respiratory tract infections (ELVIS Kids) |
| <b>AUTHORS</b>             | Ramalingam, Sandeep; Graham, Catriona; Oatey, Katherine; Rayson, Phillip; Stoddart, Andrew; Sheikh, Aziz; Cunningham, Steven                                                                                 |

This article was not externally reviewed at BMJ Open. Protocols that have been independently assessed prior to submission to BMJ Open are usually fast-tracked to publication on the grounds that further substantial changes will not be possible. This independent assessment will usually be external, independent review for both a substantial grant award from a non-commercial or government funder and ethics approval.
