# Supplementary material for: Study protocol of the Edinburgh and Lothian Virus Intervention Study in Kids: a randomised controlled trial of hypertonic saline nose drops in children with upper respiratory tract infections (ELVIS Kids)
Source: PubMed Central journal article supplement — BMJ Open. 2021 May 5;11(5):e049964. doi: 10.1136/bmjopen-2021-049964 (PMC8103393; doi:10.1136/bmjopen-2021-049964), 2021-05-05
Supplement: bmjopen-2021-049964supp001.pdf [file bmjopen-2021-049964supp001.pdf]

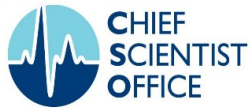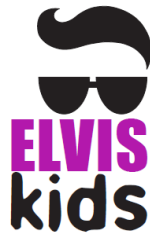

<INSERT  
TRUST  
LOGO>

## ELVIS Kids: Information Sheet for children

**Hello, this is ELVIS. He has a Cold!**

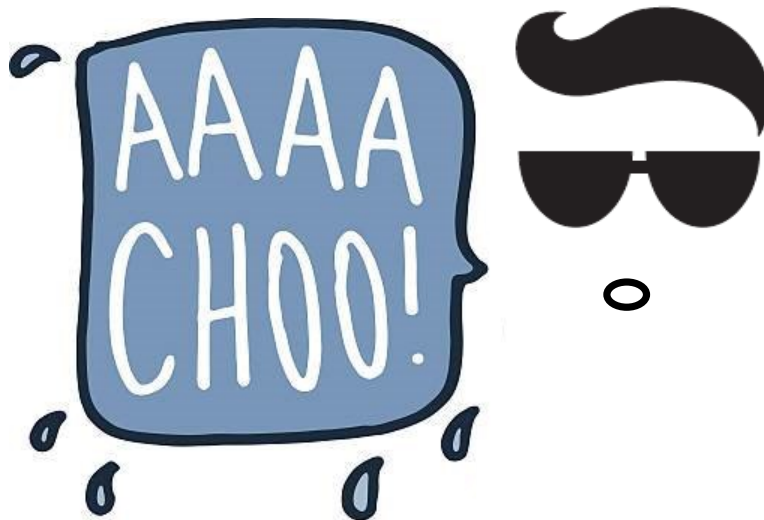

**Elvis does not like a cold.**

**It makes him cough, his nose runs, and he is too tired to play.**

**He wishes there was a cure for the cold!**

**So, Elvis goes to meet the nurse in the hospital to take part in a study.**

**The nurse tells Elvis that he will need to take a swab from his nose for a few days. This is like a cotton bud wiping the inside of his nose. This won't hurt but might tickle a bit!**

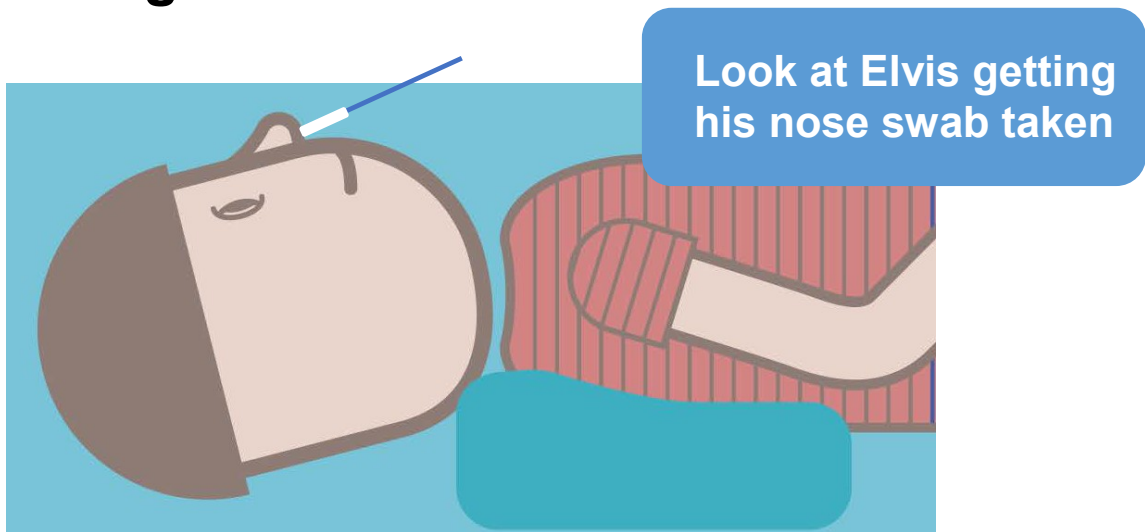

**The nurse tells Elvis that he may be in the group of children that need nose drops for their cold until they are well.**

**If he is, he will lie down and a few drops of water will be put up his nose by a grown up in his family. This might be tickly or make him want to blow his nose. He will do this every day until his cold gets better.**

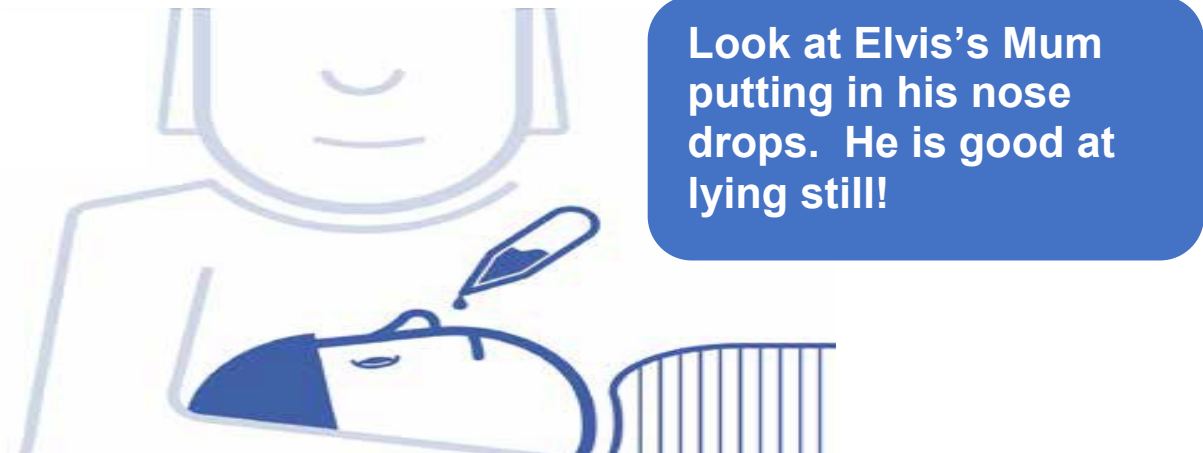

**Not all the children helping with the study will use nose drops. The nurse will look at their computer to see which children will get them.**

**The nurse tells Elvis that he doesn't have to take part if he doesn't want to and he can change his mind later if he wants. He just needs to tell a grown up.**

**The nurse thanks Elvis for his interest in the study.**

**Do you want to be like Elvis and help the nurse too?**

**What is your name: \_\_\_\_\_**

## Colour in this picture of Elvis's Teddy who is visiting the nurse too:

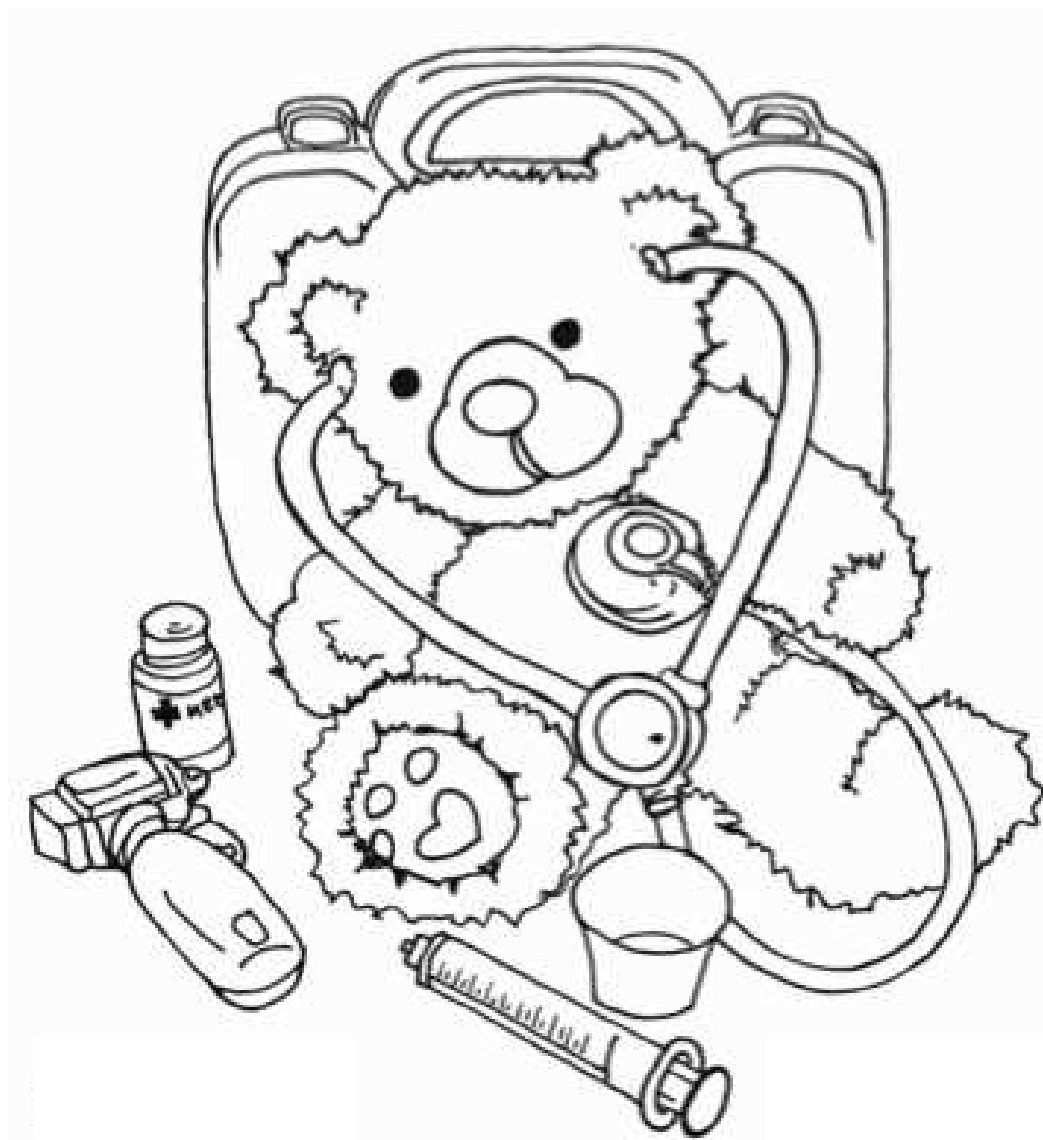

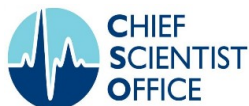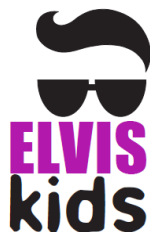

<INSERT  
TRUST  
LOGO>

## ELVIS Kids: Assent Form for children

Child to tick all they agree with:

|                                                               | Participant Number: |                                                          |
|---------------------------------------------------------------|---------------------|----------------------------------------------------------|
| Do you understand what this study is about?                   |                     | Yes <input type="checkbox"/> No <input type="checkbox"/> |
| Have you asked all the questions you want?                    |                     | Yes <input type="checkbox"/> No <input type="checkbox"/> |
| Have you had your questions answered in a way you understand? |                     | Yes <input type="checkbox"/> No <input type="checkbox"/> |
| Are you happy to take part?                                   |                     | Yes <input type="checkbox"/> No <input type="checkbox"/> |

If any answers are 'no' or you don't want to take part, don't sign your name!

If you do want to take part, you can write your name below:

Your name \_\_\_\_\_

Date \_\_\_\_\_

The nurse who explained this project to you needs to sign too:

Print Name \_\_\_\_\_

Sign \_\_\_\_\_

Date \_\_\_\_\_

**Thank you for your help!**

<INSERT  
TRUST LOGO>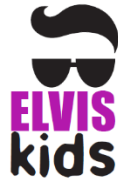Participant Number: 

| CONSENT FORM: ELVIS Kids |                                                                                                                                                                                                                                                                                                                                                                                                                                                  | Please initial box                                       |
|--------------------------|--------------------------------------------------------------------------------------------------------------------------------------------------------------------------------------------------------------------------------------------------------------------------------------------------------------------------------------------------------------------------------------------------------------------------------------------------|----------------------------------------------------------|
| 1.                       | I confirm that I have read and understand the information sheet (Dated: _____ and Version Number _____) for the above study. I have had the opportunity to consider the information, ask questions and have had these questions answered satisfactorily.                                                                                                                                                                                         | <input type="checkbox"/>                                 |
| 2.                       | I understand that my participation and my child's participation is voluntary and that I am free to withdraw at any time without giving any reason and without my child's medical care and/or legal rights being affected.                                                                                                                                                                                                                        | <input type="checkbox"/>                                 |
| 3.                       | I give permission for the study team to access my child's medical records if needed, to collect data on visits to hospital, and treatment received and to check whether they are suitable to take part in the study.                                                                                                                                                                                                                             | <input type="checkbox"/>                                 |
| 4.                       | I understand that relevant sections of my child's medical notes and data collected during the study may be looked at by individuals in the study team, from the Sponsor (University of Edinburgh and/or NHS Lothian), from NHS <INSERT TRUST NAME> or other regulatory authorities where it is relevant to my child taking part in this study. I give permission for these individuals to have access to my child's data and/or medical records. | <input type="checkbox"/>                                 |
| 5.                       | I give permission for my personal information and my child's personal information (including my child's date of birth, and my telephone number and email address) to be passed to the University of Edinburgh for administration of the study.                                                                                                                                                                                                   | <input type="checkbox"/>                                 |
| 6.                       | I understand that the nose swabs collected from my child will be tested to see which bacteria or viruses have caused my child's cold.                                                                                                                                                                                                                                                                                                            | <input type="checkbox"/>                                 |
| 7.                       | I understand that the nose swabs collected from my child may be tested for human DNA to check the samples have been taken correctly.                                                                                                                                                                                                                                                                                                             | <input type="checkbox"/>                                 |
| 8.                       | I agree to my child's anonymised data and nose swabs being kept for use in future ethically approved studies and I understand the samples will be held securely in the Lothian NRS BioResource.                                                                                                                                                                                                                                                  | Yes <input type="checkbox"/> No <input type="checkbox"/> |
| 9.                       | I understand that as part of future ethically approved studies the samples may be tested for human DNA to identify why some children get more infections or why some children have mild and others have severe illness and consent to it.                                                                                                                                                                                                        | Yes <input type="checkbox"/> No <input type="checkbox"/> |
| 10.                      | I agree to my child's General Practitioner being informed of their participation in the study.                                                                                                                                                                                                                                                                                                                                                   | <input type="checkbox"/>                                 |
| 11.                      | I give permission for the trial researchers to contact me by email, phone and text message during the study.                                                                                                                                                                                                                                                                                                                                     | <input type="checkbox"/>                                 |
| 12.                      | I agree that my child will take part in the above study.                                                                                                                                                                                                                                                                                                                                                                                         | <input type="checkbox"/>                                 |

|                                  |      |           |
|----------------------------------|------|-----------|
| Name of Person Giving Consent    | Date | Signature |
| Name of Person Receiving Consent | Date | Signature |

1x original – into Site File; 1x copy – to Participant; 1x copy – into medical record

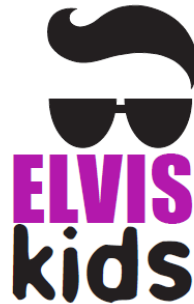

# ELVIS Kids Daily Diary (Intervention Arm)

Thanks for your help with ELVIS Kids!

Participant ID:

## Does my child have a cold?

Your child should have at least two of the cold symptoms listed **OR** one cold symptom and one symptom affecting the whole body to start the study. Please record the symptoms your child has for this cold below.

| Cold Symptoms |                                                    | Whole body Symptoms                 |                           |                                                           |
|---------------|----------------------------------------------------|-------------------------------------|---------------------------|-----------------------------------------------------------|
| Stuffy nose   | <input type="radio"/> Yes <input type="radio"/> No | Fever ( $\geq 38^{\circ}\text{C}$ ) | <input type="radio"/> Yes | <input type="radio"/> No                                  |
| Runny nose    | <input type="radio"/> Yes <input type="radio"/> No | Low energy/tired                    | <input type="radio"/> Yes | <input type="radio"/> No                                  |
| Cough         | <input type="radio"/> Yes <input type="radio"/> No | Muscle aches/pains                  | <input type="radio"/> Yes | <input type="radio"/> No <input type="radio"/> Don't Know |
| Sore throat   | <input type="radio"/> Yes <input type="radio"/> No | Sore head                           | <input type="radio"/> Yes | <input type="radio"/> No <input type="radio"/> Don't Know |

## When did the illness start?

*(Please do not start the study if the cold started more than 48 hours ago)*

**Date Started:**   -     -      
*(DD-MMM-YYYY)*

**Time Started:**   :    
*(24 hour clock)*

**If your child's medical details have changed since you first saw the study nurses, please contact the study nurses on STUDY NUMBER before starting the study**

## Did your child receive the nasal flu vaccine within the last 4 weeks?

Yes, my child received the nasal flu vaccine  No my child has not received the nasal flu vaccine

**If you answered YES, please contact the study nurses on STUDY NUMBER before starting the study**

**Date Flu Vaccine Received:**   -     -      
*(DD-MMM-YYYY)*

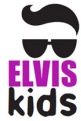Participant ID: 

# Daily Diary: Day 1

Date: -- Time (24 hour clock): :

| Select one option               | Not unwell<br>0 | Very mildly<br>1 | Mildly<br>2 | Moderately<br>3 | Moderately<br>4 | Severely<br>5 | Severely<br>6 | Severely<br>7 |
|---------------------------------|-----------------|------------------|-------------|-----------------|-----------------|---------------|---------------|---------------|
| How unwell is your child today? |                 |                  |             |                 |                 |               |               |               |

If you ticked 'Not unwell', please skip the next section and go to the 'Other Questions' section

Are these symptoms a problem for your child today? Tick the most appropriate box for each question:

| Symptom                           | No Problem | Minor Problem | Moderate Problem | Major Problem | Don't Know or N/A |
|-----------------------------------|------------|---------------|------------------|---------------|-------------------|
| Poor appetite                     |            |               |                  |               |                   |
| Not sleeping well                 |            |               |                  |               |                   |
| Irritable, cranky, fussy          |            |               |                  |               |                   |
| Feels unwell                      |            |               |                  |               |                   |
| Low energy, tired                 |            |               |                  |               |                   |
| Not playing well                  |            |               |                  |               |                   |
| Crying more than usual            |            |               |                  |               |                   |
| Needing extra care                |            |               |                  |               |                   |
| Clinginess                        |            |               |                  |               |                   |
| Headache                          |            |               |                  |               |                   |
| Sore throat                       |            |               |                  |               |                   |
| Muscle aches or pains             |            |               |                  |               |                   |
| Fever                             |            |               |                  |               |                   |
| Cough                             |            |               |                  |               |                   |
| Nasal congestion, runny nose      |            |               |                  |               |                   |
| Vomiting                          |            |               |                  |               |                   |
| Not interested in what's going on |            |               |                  |               |                   |
| Unable to get out of bed          |            |               |                  |               |                   |

## Other Questions:

How many times did you give the drops in the last day (24 hours)?

Were there any side effects?  Yes  No

If yes, please indicate the severity of symptoms by ticking the following where 0 is none and 5 is the worst it can be.

| Symptom                | Score     |   |   |   |   | Max |
|------------------------|-----------|---|---|---|---|-----|
|                        | None<br>0 | 1 | 2 | 3 | 4 |     |
| Runny nose             |           |   |   |   |   |     |
| Sneezing               |           |   |   |   |   |     |
| Pain / Sore            |           |   |   |   |   |     |
| Other symptom 1: _____ |           |   |   |   |   |     |
| Other symptom 2: _____ |           |   |   |   |   |     |
| Other symptom 3: _____ |           |   |   |   |   |     |

Was a nose swab collected this morning?  Yes  No

If no, what was the reason?

I forgot  My child refused  I had problems doing it  
 Other: \_\_\_\_\_



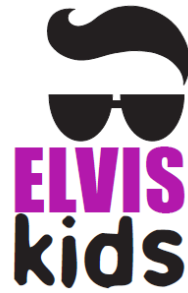

# ELVIS Kids Daily Diary (Control Arm)

Thanks for your help with ELVIS Kids!

Participant ID:

## Does my child have a cold?

Your child should have at least two of the cold symptoms listed **OR** one cold symptom and one symptom affecting the whole body to start the study. Please record the symptoms your child has for this cold below.

| Cold Symptoms |                                                    | Whole body Symptoms                 |                           |                                                           |
|---------------|----------------------------------------------------|-------------------------------------|---------------------------|-----------------------------------------------------------|
| Stuffy nose   | <input type="radio"/> Yes <input type="radio"/> No | Fever ( $\geq 38^{\circ}\text{C}$ ) | <input type="radio"/> Yes | <input type="radio"/> No                                  |
| Runny nose    | <input type="radio"/> Yes <input type="radio"/> No | Low energy/tired                    | <input type="radio"/> Yes | <input type="radio"/> No                                  |
| Cough         | <input type="radio"/> Yes <input type="radio"/> No | Muscle aches/pains                  | <input type="radio"/> Yes | <input type="radio"/> No <input type="radio"/> Don't Know |
| Sore throat   | <input type="radio"/> Yes <input type="radio"/> No | Sore head                           | <input type="radio"/> Yes | <input type="radio"/> No <input type="radio"/> Don't Know |

## When did the illness start?

*(Please do not start the study if the cold started more than 48 hours ago)*

**Date Started:**   -    -      
(DD-MMM-YYYY)

**Time Started:**   :    
(24 hour clock)

**If your child's medical details have changed since you first saw the study nurses, please contact the study nurses on STUDY NUMBER before starting the study**

## Did your child receive the nasal flu vaccine within the last 4 weeks?

Yes, my child received the nasal flu vaccine  No my child has not received the nasal flu vaccine

**If you answered YES, please contact the study nurses on STUDY NUMBER before starting the study**

**Date Flu Vaccine Received:**   -    -      
(DD-MMM-YYYY)

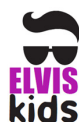Participant ID:     

## Daily Diary: Day 1

Date:   -    -    Time (24 hour clock):   :  

| Select one option               | Not unwell<br>0 | Very mildly<br>1 | Mildly<br>2 | Moderately<br>3 | Moderately<br>4 | Moderately<br>5 | Severely<br>6 | Severely<br>7 |
|---------------------------------|-----------------|------------------|-------------|-----------------|-----------------|-----------------|---------------|---------------|
| How unwell is your child today? |                 |                  |             |                 |                 |                 |               |               |

If you ticked 'Not unwell', please skip the next section and go to the 'Other Questions' section

Are these symptoms a problem for your child today? Tick the most appropriate box for each question:

| Symptom                           | No Problem | Minor Problem | Moderate Problem | Major Problem | Don't Know or N/A |
|-----------------------------------|------------|---------------|------------------|---------------|-------------------|
| Poor appetite                     |            |               |                  |               |                   |
| Not sleeping well                 |            |               |                  |               |                   |
| Irritable, cranky, fussy          |            |               |                  |               |                   |
| Feels unwell                      |            |               |                  |               |                   |
| Low energy, tired                 |            |               |                  |               |                   |
| Not playing well                  |            |               |                  |               |                   |
| Crying more than usual            |            |               |                  |               |                   |
| Needing extra care                |            |               |                  |               |                   |
| Clinginess                        |            |               |                  |               |                   |
| Headache                          |            |               |                  |               |                   |
| Sore throat                       |            |               |                  |               |                   |
| Muscle aches or pains             |            |               |                  |               |                   |
| Fever                             |            |               |                  |               |                   |
| Cough                             |            |               |                  |               |                   |
| Nasal congestion, runny nose      |            |               |                  |               |                   |
| Vomiting                          |            |               |                  |               |                   |
| Not interested in what's going on |            |               |                  |               |                   |
| Unable to get out of bed          |            |               |                  |               |                   |

### Other Questions:

|                                         |                                                                                                                                                           |
|-----------------------------------------|-----------------------------------------------------------------------------------------------------------------------------------------------------------|
| Was a nose swab collected this morning? | <input type="radio"/> Yes <input type="radio"/> No                                                                                                        |
| If no, what was the reason?             | <input type="radio"/> I forgot <input type="radio"/> My child refused <input type="radio"/> I had problems doing it<br><input type="radio"/> Other: _____ |

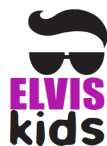Participant ID: 

## End of Illness Diary (*Intervention Arm*)

### END OF ILLNESS DETAILS

Please complete this on the first day your child is well after their cold or after 28 days if your child remains unwell

Date Diary Completed: --  
(DD-MMM-YYYY)

How many adults and children live in the house (including your child who's taking part in ELVIS Kids)?

Adults  Children

Did anybody at home develop the cold after your child?

Yes  No

*If yes, how many were adults?*

*If yes, how many were children?*

How easy was it to apply the nose drops

| Very Easy            | Easy                 | Moderate             | Difficult            | Very Difficult       | Did Not              |
|----------------------|----------------------|----------------------|----------------------|----------------------|----------------------|
| <input type="text"/> |

What was your preferred option?

Cradle child in arms  Lay child on bed  Other: \_\_\_\_\_

Do you think applying nose drops made a difference to your child's symptoms?

Yes  No

Would you do it again if your child had a cold in the future?

Yes  No

*If no, what is the reason? (tick all that apply)*

No improvement  Yes  No

Too difficult  Yes  No

Child did not like it  Yes  No

There were side effects  Yes  No

Other  Yes  No Other: \_\_\_\_\_

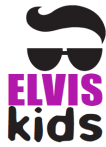Participant ID: 

## End of Illness Diary (*Intervention Arm*)

### END OF ILLNESS DETAILS (*continued*)

Did your child take over-the-counter medication for their cold?

Yes  No

*If yes, approximately how much did you spend?*

£ .

Did you seek further medical attention related to the cold?

Yes  No

*If yes, how many times did you use each of the following?*

- a. Telephone contact GP?
- b. Telephone contact out of hours GP?
- c. Telephone contact NHS 24?
- d. Attended GP?
- e. Attended out of hours GP?
- f. GP Home visit?
- g. Attended hospital?
- h. Was your child admitted to hospital?

Yes  No

*If yes, number of days and what was the reason*

Number of days:  Reason: \_\_\_\_\_

Does your child attend nursery/school?

Yes  No

*If yes, number of days your child missed nursery/school during this cold*

Number of days or work missed by adults to take care of your child

Has your child had wheezing or whistling in the chest while they had this cold?

Yes  No

*If yes, how many days did your child have wheezing or whistling?*

Participant ID: 

## End of Illness Diary (Control Arm)

### END OF ILLNESS DETAILS

Please complete this on the first day your child is well after their cold or after 28 days if your child remains unwell

Date Diary Completed: --  
(DD-MMM-YYYY)

How many adults and children live in the house (including your child who's taking part in ELVIS Kids)?

Adults  Children

Did anybody at home develop the cold after your child?

Yes  No

*If yes, how many were adults?*

*If yes, how many were children?*

Did you use salt water nose drops/sprays for your child's cold?

Yes  No

*If yes, what is the name of the drops/sprays you used?*

---

*How many days did you use the drops/sprays?*

*How many times per day did you use the drops/sprays?*

Did your child take over-the-counter medication for their cold?

Yes  No

*If yes, approximately how much did you spend?*

£ .

Participant ID:     

## End of Illness Diary (Control Arm)

### END OF ILLNESS DETAILS (continued)

Did you seek further medical attention related to the cold?

Yes  No

*If yes, how many times did you use each of the following?*

- a. Telephone contact GP?
- b. Telephone contact out of hours GP?
- c. Telephone contact NHS 24?
- d. Attended GP?
- e. Attended out of hours GP?
- f. GP Home visit?
- g. Attended hospital?
- h. Was your child admitted to hospital?

Yes  No

*If yes, number of days and diagnosis*

Number of days:   Diagnosis: \_\_\_\_\_

Does your child attend nursery/school?

Yes  No

*If yes, number of days your child missed nursery/school during this cold*

Number of days or work missed by adults to take care of your child

Has your child had wheezing or whistling in their chest while they had this cold?

Yes  No

*If yes, how many days did your child have wheezing or whistling?*

Participant ID:     

# Satisfaction Questionnaire

## About the Study

**Q1. How easy was it to collect the swabs?**

| Very Easy | Easy | Moderate | Difficult | Very Difficult | Did Not |
|-----------|------|----------|-----------|----------------|---------|
|           |      |          |           |                |         |

**Q2. How would you rate the comfort level of your child with the swabs?**

| Very Comfortable | Comfortable | Moderately Comfortable | Uncomfortable | Very Uncomfortable | Did Not |
|------------------|-------------|------------------------|---------------|--------------------|---------|
|                  |             |                        |               |                    |         |

**Q3. How easy was it to return samples?**

| Very Easy | Easy | Moderate | Difficult | Very Difficult | Did Not |
|-----------|------|----------|-----------|----------------|---------|
|           |      |          |           |                |         |

**Q4. How easy was it to complete the daily diary?**

| Very Easy | Easy | Moderate | Difficult | Very Difficult | Did Not |
|-----------|------|----------|-----------|----------------|---------|
|           |      |          |           |                |         |

**Q5. Based on your experience, do you have any suggestions for improving the trial procedures in the future?**

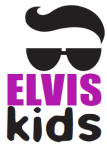Participant ID:     

## Day 28 Wheeze Details

### DAY 28 WHEEZE DETAILS

Between your child's cold ending and today, did your child develop wheezing or whistling in their chest?

Yes  No

If yes, how many days did your child have wheezing or whistling?

*(Please enter a number, e.g. 4)*
